# Supplementary material for: MolBar: a molecular identifier for inorganic and organic molecules with full support of stereoisomerism
Source: Royal Society of Chemistry journal article supplement (doi:10.1039/d4dd00208c), 2024-01-01
Supplement: d4dd00208c1.pdf [file d4dd00208c1.pdf]

---

SUPPORTING INFORMATION  
MOLBAR: A MOLECULAR IDENTIFIER FOR INORGANIC AND  
ORGANIC MOLECULES WITH FULL SUPPORT OF  
STEREOISOMERISM

---

**Nils van Staalduinen, Christoph Bannwarth**

Institute of Physical Chemistry  
RWTH Aachen University  
Aachen

{van.staalduinen, bannwarth}@pc.rwth-aachen.de

## S1 First and Second Order Derivatives of the Structure Unification Force Field

The structure unification workflow uses a force field optimization to determine the ideal geometry of a fragment. The optimizer is based on the *Newton-CG* algorithm [1]. For this, we need the first order and second order derivatives of the potential energy function with respect to the Cartesian coordinates. The energy function is given by

$$E_{\text{FF}} = E_{\text{bond}} + E_{\text{angle}} + E_{\text{dihedral}} + E_{\text{Coulomb}} \quad (1)$$

$$= \sum E_{\text{bond},ij} + \sum E_{\text{angle},ijk} + \sum E_{\text{dihedral},ijkl} + \sum E_{\text{Coulomb},ij}$$

### S1.1 Bond Potential

One single bond harmonic potential between two atoms  $i$  and  $j$  is given by

$$E_{\text{bond},ij} = k_{\text{bond}} (r_{ij}^0 - r_{ij})^2, \quad (2)$$

where distance in Cartesian space between two atoms  $i$  and  $j$  reads

$$r_{ij} = \sqrt{x_{ij}^2 + y_{ij}^2 + z_{ij}^2} \quad (3)$$

with

$$x_{ij} = x_i - x_j \quad (4)$$

and  $x_i$  is the  $x$ -coordinate of atom  $i$ .

#### S1.1.1 Derivatives of $E_{\text{bond},ij}$

The first and second order derivatives of  $E_{\text{bond},ij}$  with respect to the coordinates  $x$ ,  $y$  and  $z$  of the participating atoms  $i$  and  $j$  are:

$$\frac{d}{dx_i} E_{\text{bond},ij} = 2k_{\text{bond}} (r_{ij} - r_{ij}^0) \frac{d}{dx_i} r_{ij} \quad (5)$$

$$\frac{d}{dy_i} E_{\text{bond},ij} = 2k_{\text{bond}} (r_{ij} - r_{ij}^0) \frac{d}{dy_i} r_{ij} \quad (6)$$

$$\frac{d}{dz_i} E_{\text{bond},ij} = 2k_{\text{bond}} (r_{ij} - r_{ij}^0) \frac{d}{dz_i} r_{ij} \quad (7)$$

$$\frac{d}{dx_j} E_{\text{bond},ij} = 2k_{\text{bond}} (r_{ij} - r_{ij}^0) \frac{d}{dx_j} r_{ij} \quad (8)$$

$$\frac{d}{dy_j} E_{\text{bond},ij} = 2k_{\text{bond}} (r_{ij} - r_{ij}^0) \frac{d}{dy_j} r_{ij} \quad (9)$$

$$\frac{d}{dz_j} E_{\text{bond},ij} = 2k_{\text{bond}} (r_{ij} - r_{ij}^0) \frac{d}{dz_j} r_{ij} \quad (10)$$

$$\frac{d^2}{dx_i^2} E_{\text{bond},ij} = 2k_{\text{bond}} (r_{ij} - r_{ij}^0) \frac{d^2}{dx_i^2} r_{ij} + 2k_{\text{bond}} \left( \frac{d}{dx_i} r_{ij} \right)^2 \quad (11)$$

$$\frac{d^2}{dy_i dx_i} E_{\text{bond},ij} = 2k_{\text{bond}} (r_{ij} - r_{ij}^0) \frac{d^2}{dy_i dx_i} r_{ij} + 2k_{\text{bond}} \frac{d}{dx_i} r_{ij} \frac{d}{dy_i} r_{ij} \quad (12)$$

$$\frac{d^2}{dz_i dx_i} E_{\text{bond},ij} = 2k_{\text{bond}} (r_{ij} - r_{ij}^0) \frac{d^2}{dz_i dx_i} r_{ij} + 2k_{\text{bond}} \frac{d}{dx_i} r_{ij} \frac{d}{dz_i} r_{ij} \quad (13)$$

$$\frac{d^2}{dx_j dx_i} E_{\text{bond},ij} = 2k_{\text{bond}} (r_{ij} - r_{ij}^0) \frac{d^2}{dx_j dx_i} r_{ij} + 2k_{\text{bond}} \frac{d}{dx_i} r_{ij} \frac{d}{dx_j} r_{ij} \quad (14)$$

$$\frac{d^2}{dy_j dx_i} E_{\text{bond},ij} = 2k_{\text{bond}} (r_{ij} - r_{ij}^0) \frac{d^2}{dy_j dx_i} r_{ij} + 2k_{\text{bond}} \frac{d}{dx_i} r_{ij} \frac{d}{dy_j} r_{ij} \quad (15)$$

$$\frac{d^2}{dz_j dx_i} E_{\text{bond},ij} = 2k_{\text{bond}} (r_{ij} - r_{ij}^0) \frac{d^2}{dz_j dx_i} r_{ij} + 2k_{\text{bond}} \frac{d}{dx_i} r_{ij} \frac{d}{dz_j} r_{ij} \quad (16)$$

$$\frac{d^2}{dy_i^2} E_{\text{bond},ij} = 2k_{\text{bond}} (r_{ij} - r_{ij}^0) \frac{d^2}{dy_i^2} r_{ij} + 2k_{\text{bond}} \left( \frac{d}{dy_i} r_{ij} \right)^2 \quad (17)$$

$$\frac{d^2}{dz_i dy_i} E_{\text{bond},ij} = 2k_{\text{bond}} (r_{ij} - r_{ij}^0) \frac{d^2}{dz_i dy_i} r_{ij} + 2k_{\text{bond}} \frac{d}{dy_i} r_{ij} \frac{d}{dz_i} r_{ij} \quad (18)$$

$$\frac{d^2}{dx_j dy_i} E_{\text{bond},ij} = 2k_{\text{bond}} (r_{ij} - r_{ij}^0) \frac{d^2}{dy_i dx_j} r_{ij} + 2k_{\text{bond}} \frac{d}{dx_j} r_{ij} \frac{d}{dy_i} r_{ij} \quad (19)$$

$$\frac{d^2}{dy_j dy_i} E_{\text{bond},ij} = 2k_{\text{bond}} (r_{ij} - r_{ij}^0) \frac{d^2}{dy_j dy_i} r_{ij} + 2k_{\text{bond}} \frac{d}{dy_i} r_{ij} \frac{d}{dy_j} r_{ij} \quad (20)$$

$$\frac{d^2}{dz_j dy_i} E_{\text{bond},ij} = 2k_{\text{bond}} (r_{ij} - r_{ij}^0) \frac{d^2}{dz_j dy_i} r_{ij} + 2k_{\text{bond}} \frac{d}{dy_i} r_{ij} \frac{d}{dz_j} r_{ij} \quad (21)$$

$$\frac{d^2}{dz_i^2} E_{\text{bond},ij} = 2k_{\text{bond}} (r_{ij} - r_{ij}^0) \frac{d^2}{dz_i^2} r_{ij} + 2k_{\text{bond}} \left( \frac{d}{dz_i} r_{ij} \right)^2 \quad (22)$$

$$\frac{d^2}{dx_j dz_i} E_{\text{bond},ij} = 2k_{\text{bond}} (r_{ij} - r_{ij}^0) \frac{d^2}{dz_i dx_j} r_{ij} + 2k_{\text{bond}} \frac{d}{dx_j} r_{ij} \frac{d}{dz_i} r_{ij} \quad (23)$$

$$\frac{d^2}{dy_j dz_i} E_{\text{bond},ij} = 2k_{\text{bond}} (r_{ij} - r_{ij}^0) \frac{d^2}{dz_i dy_j} r_{ij} + 2k_{\text{bond}} \frac{d}{dy_j} r_{ij} \frac{d}{dz_i} r_{ij} \quad (24)$$

$$\frac{d^2}{dz_j dz_i} E_{\text{bond},ij} = 2k_{\text{bond}} (r_{ij} - r_{ij}^0) \frac{d^2}{dz_j dz_i} r_{ij} + 2k_{\text{bond}} \frac{d}{dz_i} r_{ij} \frac{d}{dz_j} r_{ij} \quad (25)$$

$$\frac{d^2}{dx_j^2} E_{\text{bond},ij} = 2k_{\text{bond}} (r_{ij} - r_{ij}^0) \frac{d^2}{dx_j^2} r_{ij} + 2k_{\text{bond}} \left( \frac{d}{dx_j} r_{ij} \right)^2 \quad (26)$$

$$\frac{d^2}{dy_j dx_j} E_{\text{bond},ij} = 2k_{\text{bond}} (r_{ij} - r_{ij}^0) \frac{d^2}{dy_j dx_j} r_{ij} + 2k_{\text{bond}} \frac{d}{dx_j} r_{ij} \frac{d}{dy_j} r_{ij} \quad (27)$$

$$\frac{d^2}{dz_j dx_j} E_{\text{bond},ij} = 2k_{\text{bond}} (r_{ij} - r_{ij}^0) \frac{d^2}{dz_j dx_j} r_{ij} + 2k_{\text{bond}} \frac{d}{dx_j} r_{ij} \frac{d}{dz_j} r_{ij} \quad (28)$$

$$\frac{d^2}{dy_j^2} E_{\text{bond},ij} = 2k_{\text{bond}} (r_{ij} - r_{ij}^0) \frac{d^2}{dy_j^2} r_{ij} + 2k_{\text{bond}} \left( \frac{d}{dy_j} r_{ij} \right)^2 \quad (29)$$

$$\frac{d^2}{dz_j dy_j} E_{\text{bond},ij} = 2k_{\text{bond}} (r_{ij} - r_{ij}^0) \frac{d^2}{dz_j dy_j} r_{ij} + 2k_{\text{bond}} \frac{d}{dy_j} r_{ij} \frac{d}{dz_j} r_{ij} \quad (30)$$

$$\frac{d^2}{dz_j^2} E_{\text{bond},ij} = 2k_{\text{bond}} (r_{ij} - r_{ij}^0) \frac{d^2}{dz_j^2} r_{ij} + 2k_{\text{bond}} \left( \frac{d}{dz_j} r_{ij} \right)^2 \quad (31)$$

The derivatives of  $r_{ij}$  with respect to the coordinates of the participating atoms  $i$  and  $j$  are given in Section S1.1.2.

### S1.1.2 Derivatives of $r_{ij}$

The first and second order derivatives of  $r_{ij}$  with respect to the coordinates  $x$ ,  $y$  and  $z$  of the participating atoms  $i$  and  $j$  are:

$$\frac{d}{dx_i} r_{ij} = -\frac{x_{ji}}{r_{ij}} \quad (32)$$

$$\frac{d}{dy_i} r_{ij} = -\frac{y_{ji}}{r_{ij}} \quad (33)$$

$$\frac{d}{dz_i} r_{ij} = -\frac{z_{ji}}{r_{ij}} \quad (34)$$

$$\frac{d}{dx_j} r_{ij} = \frac{x_{ji}}{r_{ij}} \quad (35)$$

$$\frac{d}{dy_j} r_{ij} = \frac{y_{ji}}{r_{ij}} \quad (36)$$

$$\frac{d}{dz_j} r_{ij} = \frac{z_{ji}}{r_{ij}} \quad (37)$$

$$\frac{d^2}{dx_i^2} r_{ij} = \frac{1}{r_{ij}} - \frac{x_{ji}^2}{r_{ij}^3} \quad (38)$$

$$\frac{d^2}{dy_i dx_i} r_{ij} = -\frac{x_{ji} y_{ji}}{r_{ij}^3} \quad (39)$$

$$\frac{d^2}{dz_i dx_i} r_{ij} = -\frac{x_{ji} z_{ji}}{r_{ij}^3} \quad (40)$$

$$\frac{d^2}{dx_j dx_i} r_{ij} = -\frac{1}{r_{ij}} + \frac{x_{ji}^2}{r_{ij}^3} \quad (41)$$

$$\frac{d^2}{dy_j dx_i} r_{ij} = \frac{x_{ji} y_{ji}}{r_{ij}^3} \quad (42)$$

$$\frac{d^2}{dz_j dx_i} r_{ij} = \frac{x_{ji} z_{ji}}{r_{ij}^3} \quad (43)$$

$$\frac{d^2}{dy_i^2} r_{ij} = \frac{1}{r_{ij}} - \frac{y_{ji}^2}{r_{ij}^3} \quad (44)$$

$$\frac{d^2}{dz_i dy_i} r_{ij} = -\frac{y_{ji} z_{ji}}{r_{ij}^3} \quad (45)$$

$$\frac{d^2}{dx_j dy_i} r_{ij} = \frac{x_{ji} y_{ji}}{r_{ij}^3} \quad (46)$$

$$\frac{d^2}{dy_j dy_i} r_{ij} = -\frac{1}{r_{ij}} + \frac{y_{ji}^2}{r_{ij}^3} \quad (47)$$

$$\frac{d^2}{dz_j dy_i} r_{ij} = \frac{y_{ji} z_{ji}}{r_{ij}^3} \quad (48)$$

$$\frac{d^2}{dz_i^2} r_{ij} = \frac{1}{r_{ij}} - \frac{z_{ji}^2}{r_{ij}^3} \quad (49)$$

$$\frac{d^2}{dx_j dz_i} r_{ij} = \frac{x_{ji} z_{ji}}{r_{ij}^3} \quad (50)$$

$$\frac{d^2}{dy_j dz_i} r_{ij} = \frac{y_{ji} z_{ji}}{r_{ij}^3} \quad (51)$$

$$\frac{d^2}{dz_j dz_i} r_{ij} = -\frac{1}{r_{ij}} + \frac{z_{ji}^2}{r_{ij}^3} \quad (52)$$

$$\frac{d^2}{dx_j^2} r_{ij} = \frac{1}{r_{ij}} - \frac{x_{ji}^2}{r_{ij}^3} \quad (53)$$

$$\frac{d^2}{dy_j dx_j} r_{ij} = -\frac{x_{ji} y_{ji}}{r_{ij}^3} \quad (54)$$

$$\frac{d^2}{dz_j dx_j} r_{ij} = -\frac{x_{ji} z_{ji}}{r_{ij}^3} \quad (55)$$

$$\frac{d^2}{dy_j^2} r_{ij} = \frac{1}{r_{ij}} - \frac{y_{ji}^2}{r_{ij}^3} \quad (56)$$

$$\frac{d^2}{dz_j dy_j} r_{ij} = -\frac{y_{ji} z_{ji}}{r_{ij}^3} \quad (57)$$

$$\frac{d^2}{dz_j^2} r_{ij} = \frac{1}{r_{ij}} - \frac{z_{ji}^2}{r_{ij}^3} \quad (58)$$

The first and second order derivatives of  $r_{ij}$  are equivalent to the derivatives of e.g.  $r_{ji}$  by interchanging atomic indices.

## S1.2 Angle Potential

The angle harmonic potential between three atoms  $i$ ,  $j$  and  $k$  is given by

$$E_{\text{angle},ijk} = k_{\text{angle}} (\alpha_{ijk}^0 - \alpha_{ijk})^2 \quad (59)$$

The angle between three atoms  $i$ ,  $j$  and  $k$  is given by

$$\alpha_{ijk} = \arccos\left(\frac{x_{ij}x_{kj} + y_{ij}y_{kj} + z_{ij}z_{kj}}{r_{ij}r_{kj}}\right) \quad (60)$$

$$= \arccos\left(\frac{a_{ijk}}{r_{ij}r_{kj}}\right), \quad (61)$$

where  $a_{ijk}$  is the dot product of the vectors  $\mathbf{r}_{ij}$  and  $\mathbf{r}_{kj}$ .

### S1.2.1 Derivatives of $E_{\text{angle},ijk}$

The first and second order derivatives of  $E_{\text{angle},ijk}$  with respect to the coordinates  $x$ ,  $y$  and  $z$  of the participating atoms  $i$ ,  $j$  and  $k$  are:

$$\frac{d}{dx_i} E_{\text{angle},ijk} = 2k_{\text{angle}} (\alpha_{ijk} - \alpha_{ijk}^0) \frac{d}{dx_i} \alpha_{ijk} \quad (62)$$

$$\frac{d}{dy_i} E_{\text{angle},ijk} = 2k_{\text{angle}} (\alpha_{ijk} - \alpha_{ijk}^0) \frac{d}{dy_i} \alpha_{ijk} \quad (63)$$

$$\frac{d}{dz_i} E_{\text{angle},ijk} = 2k_{\text{angle}} (\alpha_{ijk} - \alpha_{ijk}^0) \frac{d}{dz_i} \alpha_{ijk} \quad (64)$$

$$\frac{d}{dx_j} E_{\text{angle},ijk} = 2k_{\text{angle}} (\alpha_{ijk} - \alpha_{ijk}^0) \frac{d}{dx_j} \alpha_{ijk} \quad (65)$$

$$\frac{d}{dy_j} E_{\text{angle},ijk} = 2k_{\text{angle}} (\alpha_{ijk} - \alpha_{ijk}^0) \frac{d}{dy_j} \alpha_{ijk} \quad (66)$$

$$\frac{d}{dz_j} E_{\text{angle},ijk} = 2k_{\text{angle}} (\alpha_{ijk} - \alpha_{ijk}^0) \frac{d}{dz_j} \alpha_{ijk} \quad (67)$$

$$\frac{d}{dx_k} E_{\text{angle},ijk} = 2k_{\text{angle}} (\alpha_{ijk} - \alpha_{ijk}^0) \frac{d}{dx_k} \alpha_{ijk} \quad (68)$$

$$\frac{d}{dy_k} E_{\text{angle},ijk} = 2k_{\text{angle}} (\alpha_{ijk} - \alpha_{ijk}^0) \frac{d}{dy_k} \alpha_{ijk} \quad (69)$$

$$\frac{d}{dz_k} E_{\text{angle},ijk} = 2k_{\text{angle}} (\alpha_{ijk} - \alpha_{ijk}^0) \frac{d}{dz_k} \alpha_{ijk} \quad (70)$$

$$\frac{d^2}{dx_i^2} E_{\text{angle},ijk} = 2k_{\text{angle}} (\alpha_{ijk} - \alpha_{ijk}^0) \frac{d^2}{dx_i^2} \alpha_{ijk} + 2k_{\text{angle}} \left(\frac{d}{dx_i} \alpha_{ijk}\right)^2 \quad (71)$$

$$\frac{d^2}{dy_i dx_i} E_{\text{angle},ijk} = 2k_{\text{angle}} (\alpha_{ijk} - \alpha_{ijk}^0) \frac{d^2}{dy_i dx_i} \alpha_{ijk} + 2k_{\text{angle}} \frac{d}{dx_i} \alpha_{ijk} \frac{d}{dy_i} \alpha_{ijk} \quad (72)$$

$$\frac{d^2}{dz_i dx_i} E_{\text{angle},ijk} = 2k_{\text{angle}} (\alpha_{ijk} - \alpha_{ijk}^0) \frac{d^2}{dz_i dx_i} \alpha_{ijk} + 2k_{\text{angle}} \frac{d}{dx_i} \alpha_{ijk} \frac{d}{dz_i} \alpha_{ijk} \quad (73)$$

$$\frac{d^2}{dx_j dx_i} E_{\text{angle},ijk} = 2k_{\text{angle}} (\alpha_{ijk} - \alpha_{ijk}^0) \frac{d^2}{dx_j dx_i} \alpha_{ijk} + 2k_{\text{angle}} \frac{d}{dx_i} \alpha_{ijk} \frac{d}{dx_j} \alpha_{ijk} \quad (74)$$

$$\frac{d^2}{dy_j dx_i} E_{\text{angle},ijk} = 2k_{\text{angle}} (\alpha_{ijk} - \alpha_{ijk}^0) \frac{d^2}{dy_j dx_i} \alpha_{ijk} + 2k_{\text{angle}} \frac{d}{dx_i} \alpha_{ijk} \frac{d}{dy_j} \alpha_{ijk} \quad (75)$$

$$\frac{d^2}{dz_j dx_i} E_{\text{angle},ijk} = 2k_{\text{angle}} (\alpha_{ijk} - \alpha_{ijk}^0) \frac{d^2}{dz_j dx_i} \alpha_{ijk} + 2k_{\text{angle}} \frac{d}{dx_i} \alpha_{ijk} \frac{d}{dz_j} \alpha_{ijk} \quad (76)$$

$$\frac{d^2}{dx_k dx_i} E_{\text{angle},ijk} = 2k_{\text{angle}} (\alpha_{ijk} - \alpha_{ijk}^0) \frac{d^2}{dx_k dx_i} \alpha_{ijk} + 2k_{\text{angle}} \frac{d}{dx_i} \alpha_{ijk} \frac{d}{dx_k} \alpha_{ijk} \quad (77)$$

$$\frac{d^2}{dy_k dx_i} E_{\text{angle},ijk} = 2k_{\text{angle}} (\alpha_{ijk} - \alpha_{ijk}^0) \frac{d^2}{dy_k dx_i} \alpha_{ijk} + 2k_{\text{angle}} \frac{d}{dx_i} \alpha_{ijk} \frac{d}{dy_k} \alpha_{ijk} \quad (78)$$

$$\frac{d^2}{dz_k dx_i} E_{\text{angle},ijk} = 2k_{\text{angle}} (\alpha_{ijk} - \alpha_{ijk}^0) \frac{d^2}{dz_k dx_i} \alpha_{ijk} + 2k_{\text{angle}} \frac{d}{dx_i} \alpha_{ijk} \frac{d}{dz_k} \alpha_{ijk} \quad (79)$$

$$\frac{d^2}{dy_i^2} E_{\text{angle},ijk} = 2k_{\text{angle}} (\alpha_{ijk} - \alpha_{ijk}^0) \frac{d^2}{dy_i^2} \alpha_{ijk} + 2k_{\text{angle}} \left( \frac{d}{dy_i} \alpha_{ijk} \right)^2 \quad (80)$$

$$\frac{d^2}{dz_i dy_i} E_{\text{angle},ijk} = 2k_{\text{angle}} (\alpha_{ijk} - \alpha_{ijk}^0) \frac{d^2}{dz_i dy_i} \alpha_{ijk} + 2k_{\text{angle}} \frac{d}{dy_i} \alpha_{ijk} \frac{d}{dz_i} \alpha_{ijk} \quad (81)$$

$$\frac{d^2}{dx_j dy_i} E_{\text{angle},ijk} = 2k_{\text{angle}} (\alpha_{ijk} - \alpha_{ijk}^0) \frac{d^2}{dy_i dx_j} \alpha_{ijk} + 2k_{\text{angle}} \frac{d}{dx_j} \alpha_{ijk} \frac{d}{dy_i} \alpha_{ijk} \quad (82)$$

$$\frac{d^2}{dy_j dy_i} E_{\text{angle},ijk} = 2k_{\text{angle}} (\alpha_{ijk} - \alpha_{ijk}^0) \frac{d^2}{dy_j dy_i} \alpha_{ijk} + 2k_{\text{angle}} \frac{d}{dy_i} \alpha_{ijk} \frac{d}{dy_j} \alpha_{ijk} \quad (83)$$

$$\frac{d^2}{dz_j dy_i} E_{\text{angle},ijk} = 2k_{\text{angle}} (\alpha_{ijk} - \alpha_{ijk}^0) \frac{d^2}{dz_j dy_i} \alpha_{ijk} + 2k_{\text{angle}} \frac{d}{dy_i} \alpha_{ijk} \frac{d}{dz_j} \alpha_{ijk} \quad (84)$$

$$\frac{d^2}{dx_k dy_i} E_{\text{angle},ijk} = 2k_{\text{angle}} (\alpha_{ijk} - \alpha_{ijk}^0) \frac{d^2}{dy_i dx_k} \alpha_{ijk} + 2k_{\text{angle}} \frac{d}{dx_k} \alpha_{ijk} \frac{d}{dy_i} \alpha_{ijk} \quad (85)$$

$$\frac{d^2}{dy_k dy_i} E_{\text{angle},ijk} = 2k_{\text{angle}} (\alpha_{ijk} - \alpha_{ijk}^0) \frac{d^2}{dy_k dy_i} \alpha_{ijk} + 2k_{\text{angle}} \frac{d}{dy_i} \alpha_{ijk} \frac{d}{dy_k} \alpha_{ijk} \quad (86)$$

$$\frac{d^2}{dz_k dy_i} E_{\text{angle},ijk} = 2k_{\text{angle}} (\alpha_{ijk} - \alpha_{ijk}^0) \frac{d^2}{dz_k dy_i} \alpha_{ijk} + 2k_{\text{angle}} \frac{d}{dy_i} \alpha_{ijk} \frac{d}{dz_k} \alpha_{ijk} \quad (87)$$

$$\frac{d^2}{dz_i^2} E_{\text{angle},ijk} = 2k_{\text{angle}} (\alpha_{ijk} - \alpha_{ijk}^0) \frac{d^2}{dz_i^2} \alpha_{ijk} + 2k_{\text{angle}} \left( \frac{d}{dz_i} \alpha_{ijk} \right)^2 \quad (88)$$

$$\frac{d^2}{dx_j dz_i} E_{\text{angle},ijk} = 2k_{\text{angle}} (\alpha_{ijk} - \alpha_{ijk}^0) \frac{d^2}{dz_i dx_j} \alpha_{ijk} + 2k_{\text{angle}} \frac{d}{dx_j} \alpha_{ijk} \frac{d}{dz_i} \alpha_{ijk} \quad (89)$$

$$\frac{d^2}{dy_j dz_i} E_{\text{angle},ijk} = 2k_{\text{angle}} (\alpha_{ijk} - \alpha_{ijk}^0) \frac{d^2}{dz_i dy_j} \alpha_{ijk} + 2k_{\text{angle}} \frac{d}{dy_j} \alpha_{ijk} \frac{d}{dz_i} \alpha_{ijk} \quad (90)$$

$$\frac{d^2}{dz_j dz_i} E_{\text{angle},ijk} = 2k_{\text{angle}} (\alpha_{ijk} - \alpha_{ijk}^0) \frac{d^2}{dz_j dz_i} \alpha_{ijk} + 2k_{\text{angle}} \frac{d}{dz_i} \alpha_{ijk} \frac{d}{dz_j} \alpha_{ijk} \quad (91)$$

$$\frac{d^2}{dx_k dz_i} E_{\text{angle},ijk} = 2k_{\text{angle}} (\alpha_{ijk} - \alpha_{ijk}^0) \frac{d^2}{dz_i dx_k} \alpha_{ijk} + 2k_{\text{angle}} \frac{d}{dx_k} \alpha_{ijk} \frac{d}{dz_i} \alpha_{ijk} \quad (92)$$

$$\frac{d^2}{dy_k dz_i} E_{\text{angle},ijk} = 2k_{\text{angle}} (\alpha_{ijk} - \alpha_{ijk}^0) \frac{d^2}{dz_i dy_k} \alpha_{ijk} + 2k_{\text{angle}} \frac{d}{dy_k} \alpha_{ijk} \frac{d}{dz_i} \alpha_{ijk} \quad (93)$$

$$\frac{d^2}{dz_k dz_i} E_{\text{angle},ijk} = 2k_{\text{angle}} (\alpha_{ijk} - \alpha_{ijk}^0) \frac{d^2}{dz_k dz_i} \alpha_{ijk} + 2k_{\text{angle}} \frac{d}{dz_i} \alpha_{ijk} \frac{d}{dz_k} \alpha_{ijk} \quad (94)$$

$$\frac{d^2}{dx_j^2} E_{\text{angle},ijk} = 2k_{\text{angle}} (\alpha_{ijk} - \alpha_{ijk}^0) \frac{d^2}{dx_j^2} \alpha_{ijk} + 2k_{\text{angle}} \left( \frac{d}{dx_j} \alpha_{ijk} \right)^2 \quad (95)$$

$$\frac{d^2}{dy_j dx_j} E_{\text{angle},ijk} = 2k_{\text{angle}} (\alpha_{ijk} - \alpha_{ijk}^0) \frac{d^2}{dy_j dx_j} \alpha_{ijk} + 2k_{\text{angle}} \frac{d}{dx_j} \alpha_{ijk} \frac{d}{dy_j} \alpha_{ijk} \quad (96)$$

$$\frac{d^2}{dz_j dx_j} E_{\text{angle},ijk} = 2k_{\text{angle}} (\alpha_{ijk} - \alpha_{ijk}^0) \frac{d^2}{dz_j dx_j} \alpha_{ijk} + 2k_{\text{angle}} \frac{d}{dx_j} \alpha_{ijk} \frac{d}{dz_j} \alpha_{ijk} \quad (97)$$

$$\frac{d^2}{dx_k dx_j} E_{\text{angle},ijk} = 2k_{\text{angle}} (\alpha_{ijk} - \alpha_{ijk}^0) \frac{d^2}{dx_k dx_j} \alpha_{ijk} + 2k_{\text{angle}} \frac{d}{dx_j} \alpha_{ijk} \frac{d}{dx_k} \alpha_{ijk} \quad (98)$$

$$\frac{d^2}{dy_k dx_j} E_{\text{angle},ijk} = 2k_{\text{angle}} (\alpha_{ijk} - \alpha_{ijk}^0) \frac{d^2}{dy_k dx_j} \alpha_{ijk} + 2k_{\text{angle}} \frac{d}{dx_j} \alpha_{ijk} \frac{d}{dy_k} \alpha_{ijk} \quad (99)$$

$$\frac{d^2}{dz_k dx_j} E_{\text{angle},ijk} = 2k_{\text{angle}} (\alpha_{ijk} - \alpha_{ijk}^0) \frac{d^2}{dz_k dx_j} \alpha_{ijk} + 2k_{\text{angle}} \frac{d}{dx_j} \alpha_{ijk} \frac{d}{dz_k} \alpha_{ijk} \quad (100)$$

$$\frac{d^2}{dy_j^2} E_{\text{angle},ijk} = 2k_{\text{angle}} (\alpha_{ijk} - \alpha_{ijk}^0) \frac{d^2}{dy_j^2} \alpha_{ijk} + 2k_{\text{angle}} \left( \frac{d}{dy_j} \alpha_{ijk} \right)^2 \quad (101)$$

$$\frac{d^2}{dz_j dy_j} E_{\text{angle},ijk} = 2k_{\text{angle}} (\alpha_{ijk} - \alpha_{ijk}^0) \frac{d^2}{dz_j dy_j} \alpha_{ijk} + 2k_{\text{angle}} \frac{d}{dy_j} \alpha_{ijk} \frac{d}{dz_j} \alpha_{ijk} \quad (102)$$

$$\frac{d^2}{dx_k dy_j} E_{\text{angle},ijk} = 2k_{\text{angle}} (\alpha_{ijk} - \alpha_{ijk}^0) \frac{d^2}{dy_j dx_k} \alpha_{ijk} + 2k_{\text{angle}} \frac{d}{dx_k} \alpha_{ijk} \frac{d}{dy_j} \alpha_{ijk} \quad (103)$$

$$\frac{d^2}{dy_k dy_j} E_{\text{angle},ijk} = 2k_{\text{angle}} (\alpha_{ijk} - \alpha_{ijk}^0) \frac{d^2}{dy_k dy_j} \alpha_{ijk} + 2k_{\text{angle}} \frac{d}{dy_j} \alpha_{ijk} \frac{d}{dy_k} \alpha_{ijk} \quad (104)$$

$$\frac{d^2}{dz_k dy_j} E_{\text{angle},ijk} = 2k_{\text{angle}} (\alpha_{ijk} - \alpha_{ijk}^0) \frac{d^2}{dz_k dy_j} \alpha_{ijk} + 2k_{\text{angle}} \frac{d}{dy_j} \alpha_{ijk} \frac{d}{dz_k} \alpha_{ijk} \quad (105)$$

$$\frac{d^2}{dz_j^2} E_{\text{angle},ijk} = 2k_{\text{angle}} (\alpha_{ijk} - \alpha_{ijk}^0) \frac{d^2}{dz_j^2} \alpha_{ijk} + 2k_{\text{angle}} \left( \frac{d}{dz_j} \alpha_{ijk} \right)^2 \quad (106)$$

$$\frac{d^2}{dx_k dz_j} E_{\text{angle},ijk} = 2k_{\text{angle}} (\alpha_{ijk} - \alpha_{ijk}^0) \frac{d^2}{dz_j dx_k} \alpha_{ijk} + 2k_{\text{angle}} \frac{d}{dx_k} \alpha_{ijk} \frac{d}{dz_j} \alpha_{ijk} \quad (107)$$

$$\frac{d^2}{dy_k dz_j} E_{\text{angle},ijk} = 2k_{\text{angle}} (\alpha_{ijk} - \alpha_{ijk}^0) \frac{d^2}{dz_j dy_k} \alpha_{ijk} + 2k_{\text{angle}} \frac{d}{dy_k} \alpha_{ijk} \frac{d}{dz_j} \alpha_{ijk} \quad (108)$$

$$\frac{d^2}{dz_k dz_j} E_{\text{angle},ijk} = 2k_{\text{angle}} (\alpha_{ijk} - \alpha_{ijk}^0) \frac{d^2}{dz_k dz_j} \alpha_{ijk} + 2k_{\text{angle}} \frac{d}{dz_j} \alpha_{ijk} \frac{d}{dz_k} \alpha_{ijk} \quad (109)$$

$$\frac{d^2}{dx_k^2} E_{\text{angle},ijk} = 2k_{\text{angle}} (\alpha_{ijk} - \alpha_{ijk}^0) \frac{d^2}{dx_k^2} \alpha_{ijk} + 2k_{\text{angle}} \left( \frac{d}{dx_k} \alpha_{ijk} \right)^2 \quad (110)$$

$$\frac{d^2}{dy_k dx_k} E_{\text{angle},ijk} = 2k_{\text{angle}} (\alpha_{ijk} - \alpha_{ijk}^0) \frac{d^2}{dy_k dx_k} \alpha_{ijk} + 2k_{\text{angle}} \frac{d}{dx_k} \alpha_{ijk} \frac{d}{dy_k} \alpha_{ijk} \quad (111)$$

$$\frac{d^2}{dz_k dx_k} E_{\text{angle},ijk} = 2k_{\text{angle}} (\alpha_{ijk} - \alpha_{ijk}^0) \frac{d^2}{dz_k dx_k} \alpha_{ijk} + 2k_{\text{angle}} \frac{d}{dx_k} \alpha_{ijk} \frac{d}{dz_k} \alpha_{ijk} \quad (112)$$

$$\frac{d^2}{dy_k^2} E_{\text{angle},ijk} = 2k_{\text{angle}} (\alpha_{ijk} - \alpha_{ijk}^0) \frac{d^2}{dy_k^2} \alpha_{ijk} + 2k_{\text{angle}} \left( \frac{d}{dy_k} \alpha_{ijk} \right)^2 \quad (113)$$

$$\frac{d^2}{dz_k dy_k} E_{\text{angle},ijk} = 2k_{\text{angle}} (\alpha_{ijk} - \alpha_{ijk}^0) \frac{d^2}{dz_k dy_k} \alpha_{ijk} + 2k_{\text{angle}} \frac{d}{dy_k} \alpha_{ijk} \frac{d}{dz_k} \alpha_{ijk} \quad (114)$$

$$\frac{d^2}{dz_k^2} E_{\text{angle},ijk} = 2k_{\text{angle}} (\alpha_{ijk} - \alpha_{ijk}^0) \frac{d^2}{dz_k^2} \alpha_{ijk} + 2k_{\text{angle}} \left( \frac{d}{dz_k} \alpha_{ijk} \right)^2 \quad (115)$$

The derivatives of  $\alpha_{ijk}$  with respect to the coordinates  $x$ ,  $y$  and  $z$  of the participating atoms  $i$ ,  $j$  and  $k$  are defined in Section S1.2.2.

### S1.2.2 Derivatives of $\alpha_{ijk}$

The first and second order derivatives of  $\alpha_{ijk}$  with respect to the coordinates  $x$ ,  $y$  and  $z$  of the participating atoms  $i$ ,  $j$  and  $k$  are:

$$\frac{d}{dx_i} \alpha_{ijk} = \frac{a_{ijk} \frac{d}{dx_i} r_{ij} - r_{ij} \frac{d}{dx_i} a_{ijk}}{r_{ij}^2 r_{kj} \sqrt{-\frac{a_{ijk}^2}{r_{ij}^2 r_{kj}^2} + 1}} \quad (116)$$



$$\frac{d}{dy_i} \alpha_{ijk} = \frac{a_{ijk} \frac{d}{dy_i} r_{ij} - r_{ij} \frac{d}{dy_i} a_{ijk}}{r_{ij}^2 r_{kj} \sqrt{-\frac{a_{ijk}^2}{r_{ij}^2 r_{kj}^2} + 1}} \quad (117)$$

$$\frac{d}{dz_i} \alpha_{ijk} = \frac{a_{ijk} \frac{d}{dz_i} r_{ij} - r_{ij} \frac{d}{dz_i} a_{ijk}}{r_{ij}^2 r_{kj} \sqrt{-\frac{a_{ijk}^2}{r_{ij}^2 r_{kj}^2} + 1}} \quad (118)$$

$$\frac{d}{dx_j} \alpha_{ijk} = \frac{a_{ijk} r_{ij} \frac{d}{dx_j} r_{kj} + a_{ijk} r_{kj} \frac{d}{dx_j} r_{ij} - r_{ij} r_{kj} \frac{d}{dx_j} a_{ijk}}{r_{ij}^2 r_{kj}^2 \sqrt{-\frac{a_{ijk}^2}{r_{ij}^2 r_{kj}^2} + 1}} \quad (119)$$

$$\frac{d}{dy_j} \alpha_{ijk} = \frac{a_{ijk} r_{ij} \frac{d}{dy_j} r_{kj} + a_{ijk} r_{kj} \frac{d}{dy_j} r_{ij} - r_{ij} r_{kj} \frac{d}{dy_j} a_{ijk}}{r_{ij}^2 r_{kj}^2 \sqrt{-\frac{a_{ijk}^2}{r_{ij}^2 r_{kj}^2} + 1}} \quad (120)$$

$$\frac{d}{dz_j} \alpha_{ijk} = \frac{a_{ijk} r_{ij} \frac{d}{dz_j} r_{kj} + a_{ijk} r_{kj} \frac{d}{dz_j} r_{ij} - r_{ij} r_{kj} \frac{d}{dz_j} a_{ijk}}{r_{ij}^2 r_{kj}^2 \sqrt{-\frac{a_{ijk}^2}{r_{ij}^2 r_{kj}^2} + 1}} \quad (121)$$

$$\frac{d}{dx_k} \alpha_{ijk} = \frac{a_{ijk} \frac{d}{dx_k} r_{kj} - r_{kj} \frac{d}{dx_k} a_{ijk}}{r_{ij} r_{kj}^2 \sqrt{-\frac{a_{ijk}^2}{r_{ij}^2 r_{kj}^2} + 1}} \quad (122)$$

$$\frac{d}{dy_k} \alpha_{ijk} = \frac{a_{ijk} \frac{d}{dy_k} r_{kj} - r_{kj} \frac{d}{dy_k} a_{ijk}}{r_{ij} r_{kj}^2 \sqrt{-\frac{a_{ijk}^2}{r_{ij}^2 r_{kj}^2} + 1}} \quad (123)$$

$$\frac{d}{dz_k} \alpha_{ijk} = \frac{a_{ijk} \frac{d}{dz_k} r_{kj} - r_{kj} \frac{d}{dz_k} a_{ijk}}{r_{ij} r_{kj}^2 \sqrt{-\frac{a_{ijk}^2}{r_{ij}^2 r_{kj}^2} + 1}} \quad (124)$$

$$\frac{d^2}{dx_i^2} \alpha_{ijk} = \frac{\left( a_{ijk} \frac{d}{dx_i} r_{ij} - r_{ij} \frac{d}{dx_i} a_{ijk} \right) \left( -\frac{a_{ijk}^2 \frac{d}{dx_i} r_{ij}}{r_{ij}^3 r_{kj}^2} + \frac{a_{ijk} \frac{d}{dx_i} a_{ijk}}{r_{ij}^2 r_{kj}^2} \right)}{r_{ij}^2 r_{kj} \left( -\frac{a_{ijk}^2}{r_{ij}^2 r_{kj}^2} + 1 \right)^{\frac{3}{2}}} + \frac{a_{ijk} \frac{d^2}{dx_i^2} r_{ij} - r_{ij} \frac{d^2}{dx_i^2} a_{ijk}}{r_{ij}^2 r_{kj} \sqrt{-\frac{a_{ijk}^2}{r_{ij}^2 r_{kj}^2} + 1}} - \frac{2 \left( a_{ijk} \frac{d}{dx_i} r_{ij} - r_{ij} \frac{d}{dx_i} a_{ijk} \right) \frac{d}{dx_i} r_{ij}}{r_{ij}^3 r_{kj} \sqrt{-\frac{a_{ijk}^2}{r_{ij}^2 r_{kj}^2} + 1}} \quad (125)$$

$$\frac{d^2}{dy_i dx_i} \alpha_{ijk} = \frac{\left( a_{ijk} \frac{d}{dx_i} r_{ij} - r_{ij} \frac{d}{dx_i} a_{ijk} \right) \left( -\frac{a_{ijk}^2 \frac{d}{dy_i} r_{ij}}{r_{ij}^3 r_{kj}^2} + \frac{a_{ijk} \frac{d}{dy_i} a_{ijk}}{r_{ij}^2 r_{kj}^2} \right)}{r_{ij}^2 r_{kj} \left( -\frac{a_{ijk}^2}{r_{ij}^2 r_{kj}^2} + 1 \right)^{\frac{3}{2}}} + \frac{a_{ijk} \frac{d^2}{dy_i dx_i} r_{ij} - r_{ij} \frac{d^2}{dy_i dx_i} a_{ijk} - \frac{d}{dx_i} a_{ijk} \frac{d}{dy_i} r_{ij} + \frac{d}{dy_i} a_{ijk} \frac{d}{dx_i} r_{ij}}{r_{ij}^2 r_{kj} \sqrt{-\frac{a_{ijk}^2}{r_{ij}^2 r_{kj}^2} + 1}} \quad (126)$$

$$- \frac{2 \left( a_{ijk} \frac{d}{dx_i} r_{ij} - r_{ij} \frac{d}{dx_i} a_{ijk} \right) \frac{d}{dy_i} r_{ij}}{r_{ij}^3 r_{kj} \sqrt{-\frac{a_{ijk}^2}{r_{ij}^2 r_{kj}^2} + 1}}$$

$$\frac{d^2}{dz_i dx_i} \alpha_{ijk} = \frac{\left( a_{ijk} \frac{d}{dx_i} r_{ij} - r_{ij} \frac{d}{dx_i} a_{ijk} \right) \left( -\frac{a_{ijk}^2 \frac{d}{dz_i} r_{ij}}{r_{ij}^3 r_{kj}^2} + \frac{a_{ijk} \frac{d}{dz_i} a_{ijk}}{r_{ij}^2 r_{kj}^2} \right)}{r_{ij}^2 r_{kj} \left( -\frac{a_{ijk}^2}{r_{ij}^2 r_{kj}^2} + 1 \right)^{\frac{3}{2}}} + \frac{a_{ijk} \frac{d^2}{dz_i dx_i} r_{ij} - r_{ij} \frac{d^2}{dz_i dx_i} a_{ijk} - \frac{d}{dx_i} a_{ijk} \frac{d}{dz_i} r_{ij} + \frac{d}{dz_i} a_{ijk} \frac{d}{dx_i} r_{ij}}{r_{ij}^2 r_{kj} \sqrt{-\frac{a_{ijk}^2}{r_{ij}^2 r_{kj}^2} + 1}} \quad (127)$$

$$- \frac{2 \left( a_{ijk} \frac{d}{dx_i} r_{ij} - r_{ij} \frac{d}{dx_i} a_{ijk} \right) \frac{d}{dz_i} r_{ij}}{r_{ij}^3 r_{kj} \sqrt{-\frac{a_{ijk}^2}{r_{ij}^2 r_{kj}^2} + 1}}$$

$$\frac{d^2}{dx_j dx_i} \alpha_{ijk} = \frac{\left( a_{ijk} \frac{d}{dx_i} r_{ij} - r_{ij} \frac{d}{dx_i} a_{ijk} \right) \left( -\frac{a_{ijk}^2 \frac{d}{dx_j} r_{kj}}{r_{ij}^2 r_{kj}^3} - \frac{a_{ijk}^2 \frac{d}{dx_j} r_{ij}}{r_{ij}^3 r_{kj}^2} + \frac{a_{ijk} \frac{d}{dx_j} a_{ijk}}{r_{ij}^2 r_{kj}^2} \right)}{r_{ij}^2 r_{kj} \left( -\frac{a_{ijk}^2}{r_{ij}^2 r_{kj}^2} + 1 \right)^{\frac{3}{2}}} + \frac{a_{ijk} \frac{d^2}{dx_j dx_i} r_{ij} - r_{ij} \frac{d^2}{dx_j dx_i} a_{ijk} - \frac{d}{dx_i} a_{ijk} \frac{d}{dx_j} r_{ij} + \frac{d}{dx_j} a_{ijk} \frac{d}{dx_i} r_{ij}}{r_{ij}^2 r_{kj} \sqrt{-\frac{a_{ijk}^2}{r_{ij}^2 r_{kj}^2} + 1}} \quad (128)$$

$$- \frac{\left( a_{ijk} \frac{d}{dx_i} r_{ij} - r_{ij} \frac{d}{dx_i} a_{ijk} \right) \frac{d}{dx_j} r_{kj}}{r_{ij}^2 r_{kj}^2 \sqrt{-\frac{a_{ijk}^2}{r_{ij}^2 r_{kj}^2} + 1}} - \frac{2 \left( a_{ijk} \frac{d}{dx_i} r_{ij} - r_{ij} \frac{d}{dx_i} a_{ijk} \right) \frac{d}{dx_j} r_{ij}}{r_{ij}^3 r_{kj} \sqrt{-\frac{a_{ijk}^2}{r_{ij}^2 r_{kj}^2} + 1}}$$

$$\frac{d^2}{dy_j dx_i} \alpha_{ijk} = \frac{\left( a_{ijk} \frac{d}{dx_i} r_{ij} - r_{ij} \frac{d}{dx_i} a_{ijk} \right) \left( -\frac{a_{ijk}^2 \frac{d}{dy_j} r_{kj}}{r_{ij}^2 r_{kj}^3} - \frac{a_{ijk}^2 \frac{d}{dy_j} r_{ij}}{r_{ij}^3 r_{kj}^2} + \frac{a_{ijk} \frac{d}{dy_j} a_{ijk}}{r_{ij}^2 r_{kj}^2} \right)}{r_{ij}^2 r_{kj} \left( -\frac{a_{ijk}^2}{r_{ij}^2 r_{kj}^2} + 1 \right)^{\frac{3}{2}}} + \frac{a_{ijk} \frac{d^2}{dy_j dx_i} r_{ij} - r_{ij} \frac{d^2}{dy_j dx_i} a_{ijk} - \frac{d}{dx_i} a_{ijk} \frac{d}{dy_j} r_{ij} + \frac{d}{dy_j} a_{ijk} \frac{d}{dx_i} r_{ij}}{r_{ij}^2 r_{kj} \sqrt{-\frac{a_{ijk}^2}{r_{ij}^2 r_{kj}^2} + 1}} \quad (129)$$

$$- \frac{\left( a_{ijk} \frac{d}{dx_i} r_{ij} - r_{ij} \frac{d}{dx_i} a_{ijk} \right) \frac{d}{dy_j} r_{kj}}{r_{ij}^2 r_{kj}^2 \sqrt{-\frac{a_{ijk}^2}{r_{ij}^2 r_{kj}^2} + 1}} - \frac{2 \left( a_{ijk} \frac{d}{dx_i} r_{ij} - r_{ij} \frac{d}{dx_i} a_{ijk} \right) \frac{d}{dy_j} r_{ij}}{r_{ij}^3 r_{kj} \sqrt{-\frac{a_{ijk}^2}{r_{ij}^2 r_{kj}^2} + 1}}$$

$$\frac{d^2}{dz_j dx_i} \alpha_{ijk} = \frac{\left( a_{ijk} \frac{d}{dx_i} r_{ij} - r_{ij} \frac{d}{dx_i} a_{ijk} \right) \left( -\frac{a_{ijk}^2 \frac{d}{dz_j} r_{kj}}{r_{ij}^2 r_{kj}^3} - \frac{a_{ijk}^2 \frac{d}{dz_j} r_{ij}}{r_{ij}^3 r_{kj}^2} + \frac{a_{ijk} \frac{d}{dz_j} a_{ijk}}{r_{ij}^2 r_{kj}^2} \right)}{r_{ij}^2 r_{kj} \left( -\frac{a_{ijk}^2}{r_{ij}^2 r_{kj}^2} + 1 \right)^{\frac{3}{2}}} + \frac{a_{ijk} \frac{d^2}{dz_j dx_i} r_{ij} - r_{ij} \frac{d^2}{dz_j dx_i} a_{ijk} - \frac{d}{dx_i} a_{ijk} \frac{d}{dz_j} r_{ij} + \frac{d}{dz_j} a_{ijk} \frac{d}{dx_i} r_{ij}}{r_{ij}^2 r_{kj} \sqrt{-\frac{a_{ijk}^2}{r_{ij}^2 r_{kj}^2} + 1}} \quad (130)$$

$$\frac{d^2}{dx_k dx_i} \alpha_{ijk} = \frac{\left( a_{ijk} \frac{d}{dx_i} r_{ij} - r_{ij} \frac{d}{dx_i} a_{ijk} \right) \frac{d}{dz_j} r_{kj}}{r_{ij}^2 r_{kj}^2 \sqrt{-\frac{a_{ijk}^2}{r_{ij}^2 r_{kj}^2} + 1}} - \frac{2 \left( a_{ijk} \frac{d}{dx_i} r_{ij} - r_{ij} \frac{d}{dx_i} a_{ijk} \right) \frac{d}{dz_j} r_{ij}}{r_{ij}^3 r_{kj} \sqrt{-\frac{a_{ijk}^2}{r_{ij}^2 r_{kj}^2} + 1}} + \frac{\left( a_{ijk} \frac{d}{dx_i} r_{ij} - r_{ij} \frac{d}{dx_i} a_{ijk} \right) \left( -\frac{a_{ijk}^2 \frac{d}{dx_k} r_{kj}}{r_{ij}^2 r_{kj}^3} + \frac{a_{ijk} \frac{d}{dx_k} a_{ijk}}{r_{ij}^2 r_{kj}^2} \right)}{r_{ij}^2 r_{kj} \left( -\frac{a_{ijk}^2}{r_{ij}^2 r_{kj}^2} + 1 \right)^{\frac{3}{2}}} + \frac{-r_{ij} \frac{d^2}{dx_k dx_i} a_{ijk} + \frac{d}{dx_k} a_{ijk} \frac{d}{dx_i} r_{ij}}{r_{ij}^2 r_{kj} \sqrt{-\frac{a_{ijk}^2}{r_{ij}^2 r_{kj}^2} + 1}} - \frac{\left( a_{ijk} \frac{d}{dx_i} r_{ij} - r_{ij} \frac{d}{dx_i} a_{ijk} \right) \frac{d}{dx_k} r_{kj}}{r_{ij}^2 r_{kj}^2 \sqrt{-\frac{a_{ijk}^2}{r_{ij}^2 r_{kj}^2} + 1}} \quad (131)$$

$$\frac{d^2}{dy_k dx_i} \alpha_{ijk} = \frac{\left( a_{ijk} \frac{d}{dx_i} r_{ij} - r_{ij} \frac{d}{dx_i} a_{ijk} \right) \left( -\frac{a_{ijk}^2 \frac{d}{dy_k} r_{kj}}{r_{ij}^2 r_{kj}^3} + \frac{a_{ijk} \frac{d}{dy_k} a_{ijk}}{r_{ij}^2 r_{kj}^2} \right)}{r_{ij}^2 r_{kj} \left( -\frac{a_{ijk}^2}{r_{ij}^2 r_{kj}^2} + 1 \right)^{\frac{3}{2}}} + \frac{-r_{ij} \frac{d^2}{dy_k dx_i} a_{ijk} + \frac{d}{dy_k} a_{ijk} \frac{d}{dx_i} r_{ij}}{r_{ij}^2 r_{kj} \sqrt{-\frac{a_{ijk}^2}{r_{ij}^2 r_{kj}^2} + 1}} - \frac{\left( a_{ijk} \frac{d}{dx_i} r_{ij} - r_{ij} \frac{d}{dx_i} a_{ijk} \right) \frac{d}{dy_k} r_{kj}}{r_{ij}^2 r_{kj}^2 \sqrt{-\frac{a_{ijk}^2}{r_{ij}^2 r_{kj}^2} + 1}} \quad (132)$$

$$\frac{d^2}{dz_k dx_i} \alpha_{ijk} = \frac{\left( a_{ijk} \frac{d}{dx_i} r_{ij} - r_{ij} \frac{d}{dx_i} a_{ijk} \right) \left( -\frac{a_{ijk}^2 \frac{d}{dz_k} r_{kj}}{r_{ij}^2 r_{kj}^3} + \frac{a_{ijk} \frac{d}{dz_k} a_{ijk}}{r_{ij}^2 r_{kj}^2} \right)}{r_{ij}^2 r_{kj} \left( -\frac{a_{ijk}^2}{r_{ij}^2 r_{kj}^2} + 1 \right)^{\frac{3}{2}}} + \frac{-r_{ij} \frac{d^2}{dz_k dx_i} a_{ijk} + \frac{d}{dz_k} a_{ijk} \frac{d}{dx_i} r_{ij}}{r_{ij}^2 r_{kj} \sqrt{-\frac{a_{ijk}^2}{r_{ij}^2 r_{kj}^2} + 1}} - \frac{\left( a_{ijk} \frac{d}{dx_i} r_{ij} - r_{ij} \frac{d}{dx_i} a_{ijk} \right) \frac{d}{dz_k} r_{kj}}{r_{ij}^2 r_{kj}^2 \sqrt{-\frac{a_{ijk}^2}{r_{ij}^2 r_{kj}^2} + 1}} \quad (133)$$

$$\frac{d^2}{dy_i^2} \alpha_{ijk} = \frac{\left( a_{ijk} \frac{d}{dy_i} r_{ij} - r_{ij} \frac{d}{dy_i} a_{ijk} \right) \left( -\frac{a_{ijk}^2 \frac{d}{dy_i} r_{ij}}{r_{ij}^3 r_{kj}^2} + \frac{a_{ijk} \frac{d}{dy_i} a_{ijk}}{r_{ij}^2 r_{kj}^2} \right)}{r_{ij}^2 r_{kj} \left( -\frac{a_{ijk}^2}{r_{ij}^2 r_{kj}^2} + 1 \right)^{\frac{3}{2}}} + \frac{a_{ijk} \frac{d^2}{dy_i^2} r_{ij} - r_{ij} \frac{d^2}{dy_i^2} a_{ijk}}{r_{ij}^2 r_{kj} \sqrt{-\frac{a_{ijk}^2}{r_{ij}^2 r_{kj}^2} + 1}} - \frac{2 \left( a_{ijk} \frac{d}{dy_i} r_{ij} - r_{ij} \frac{d}{dy_i} a_{ijk} \right) \frac{d}{dy_i} r_{ij}}{r_{ij}^3 r_{kj} \sqrt{-\frac{a_{ijk}^2}{r_{ij}^2 r_{kj}^2} + 1}} \quad (134)$$

$$\frac{d^2}{dz_i dy_i} \alpha_{ijk} = \frac{\left( a_{ijk} \frac{d}{dy_i} r_{ij} - r_{ij} \frac{d}{dy_i} a_{ijk} \right) \left( -\frac{a_{ijk}^2 \frac{d}{dz_i} r_{ij}}{r_{ij}^3 r_{kj}^2} + \frac{a_{ijk} \frac{d}{dz_i} a_{ijk}}{r_{ij}^2 r_{kj}^2} \right)}{r_{ij}^2 r_{kj} \left( -\frac{a_{ijk}^2}{r_{ij}^2 r_{kj}^2} + 1 \right)^{\frac{3}{2}}} + \frac{a_{ijk} \frac{d^2}{dz_i dy_i} r_{ij} - r_{ij} \frac{d^2}{dz_i dy_i} a_{ijk} - \frac{d}{dy_i} a_{ijk} \frac{d}{dz_i} r_{ij} + \frac{d}{dz_i} a_{ijk} \frac{d}{dy_i} r_{ij}}{r_{ij}^2 r_{kj} \sqrt{-\frac{a_{ijk}^2}{r_{ij}^2 r_{kj}^2} + 1}} - \frac{2 \left( a_{ijk} \frac{d}{dy_i} r_{ij} - r_{ij} \frac{d}{dy_i} a_{ijk} \right) \frac{d}{dz_i} r_{ij}}{r_{ij}^3 r_{kj} \sqrt{-\frac{a_{ijk}^2}{r_{ij}^2 r_{kj}^2} + 1}} \quad (135)$$

$$\frac{d^2}{dx_j dy_i} \alpha_{ijk} = \frac{\left( a_{ijk} \frac{d}{dy_i} r_{ij} - r_{ij} \frac{d}{dy_i} a_{ijk} \right) \left( -\frac{a_{ijk}^2 \frac{d}{dx_j} r_{kj}}{r_{ij}^2 r_{kj}^3} - \frac{a_{ijk}^2 \frac{d}{dx_j} r_{ij}}{r_{ij}^3 r_{kj}^2} + \frac{a_{ijk} \frac{d}{dx_j} a_{ijk}}{r_{ij}^2 r_{kj}^2} \right)}{r_{ij}^2 r_{kj} \left( -\frac{a_{ijk}^2}{r_{ij}^2 r_{kj}^2} + 1 \right)^{\frac{3}{2}}} + \frac{a_{ijk} \frac{d^2}{dy_i dx_j} r_{ij} - r_{ij} \frac{d^2}{dy_i dx_j} a_{ijk} + \frac{d}{dx_j} a_{ijk} \frac{d}{dy_i} r_{ij} - \frac{d}{dy_i} a_{ijk} \frac{d}{dx_j} r_{ij}}{r_{ij}^2 r_{kj} \sqrt{-\frac{a_{ijk}^2}{r_{ij}^2 r_{kj}^2} + 1}} \quad (136)$$

$$\frac{d^2}{dy_j dy_i} \alpha_{ijk} = \frac{\left( a_{ijk} \frac{d}{dy_i} r_{ij} - r_{ij} \frac{d}{dy_i} a_{ijk} \right) \frac{d}{dx_j} r_{kj} - 2 \left( a_{ijk} \frac{d}{dy_i} r_{ij} - r_{ij} \frac{d}{dy_i} a_{ijk} \right) \frac{d}{dx_j} r_{ij}}{r_{ij}^2 r_{kj}^2 \sqrt{-\frac{a_{ijk}^2}{r_{ij}^2 r_{kj}^2} + 1} - r_{ij}^3 r_{kj} \sqrt{-\frac{a_{ijk}^2}{r_{ij}^2 r_{kj}^2} + 1}} + \frac{\left( a_{ijk} \frac{d}{dy_i} r_{ij} - r_{ij} \frac{d}{dy_i} a_{ijk} \right) \left( -\frac{a_{ijk}^2 \frac{d}{dy_j} r_{kj}}{r_{ij}^2 r_{kj}^3} - \frac{a_{ijk}^2 \frac{d}{dy_j} r_{ij}}{r_{ij}^3 r_{kj}^2} + \frac{a_{ijk} \frac{d}{dy_j} a_{ijk}}{r_{ij}^2 r_{kj}^2} \right)}{r_{ij}^2 r_{kj} \left( -\frac{a_{ijk}^2}{r_{ij}^2 r_{kj}^2} + 1 \right)^{\frac{3}{2}}} + \frac{a_{ijk} \frac{d^2}{dy_j dy_i} r_{ij} - r_{ij} \frac{d^2}{dy_j dy_i} a_{ijk} - \frac{d}{dy_i} a_{ijk} \frac{d}{dy_j} r_{ij} + \frac{d}{dy_j} a_{ijk} \frac{d}{dy_i} r_{ij}}{r_{ij}^2 r_{kj} \sqrt{-\frac{a_{ijk}^2}{r_{ij}^2 r_{kj}^2} + 1}} \quad (137)$$

$$\frac{d^2}{dz_j dy_i} \alpha_{ijk} = \frac{\left( a_{ijk} \frac{d}{dy_i} r_{ij} - r_{ij} \frac{d}{dy_i} a_{ijk} \right) \frac{d}{dy_j} r_{kj} - 2 \left( a_{ijk} \frac{d}{dy_i} r_{ij} - r_{ij} \frac{d}{dy_i} a_{ijk} \right) \frac{d}{dy_j} r_{ij}}{r_{ij}^2 r_{kj}^2 \sqrt{-\frac{a_{ijk}^2}{r_{ij}^2 r_{kj}^2} + 1} - r_{ij}^3 r_{kj} \sqrt{-\frac{a_{ijk}^2}{r_{ij}^2 r_{kj}^2} + 1}} + \frac{\left( a_{ijk} \frac{d}{dy_i} r_{ij} - r_{ij} \frac{d}{dy_i} a_{ijk} \right) \left( -\frac{a_{ijk}^2 \frac{d}{dz_j} r_{kj}}{r_{ij}^2 r_{kj}^3} - \frac{a_{ijk}^2 \frac{d}{dz_j} r_{ij}}{r_{ij}^3 r_{kj}^2} + \frac{a_{ijk} \frac{d}{dz_j} a_{ijk}}{r_{ij}^2 r_{kj}^2} \right)}{r_{ij}^2 r_{kj} \left( -\frac{a_{ijk}^2}{r_{ij}^2 r_{kj}^2} + 1 \right)^{\frac{3}{2}}} + \frac{a_{ijk} \frac{d^2}{dz_j dy_i} r_{ij} - r_{ij} \frac{d^2}{dz_j dy_i} a_{ijk} - \frac{d}{dy_i} a_{ijk} \frac{d}{dz_j} r_{ij} + \frac{d}{dz_j} a_{ijk} \frac{d}{dy_i} r_{ij}}{r_{ij}^2 r_{kj} \sqrt{-\frac{a_{ijk}^2}{r_{ij}^2 r_{kj}^2} + 1}} \quad (138)$$

$$\frac{d^2}{dx_k dy_i} \alpha_{ijk} = \frac{\left( a_{ijk} \frac{d}{dy_i} r_{ij} - r_{ij} \frac{d}{dy_i} a_{ijk} \right) \left( -\frac{a_{ijk}^2 \frac{d}{dx_k} r_{kj}}{r_{ij}^2 r_{kj}^3} + \frac{a_{ijk} \frac{d}{dx_k} a_{ijk}}{r_{ij}^2 r_{kj}^2} \right)}{r_{ij}^2 r_{kj} \left( -\frac{a_{ijk}^2}{r_{ij}^2 r_{kj}^2} + 1 \right)^{\frac{3}{2}}} + \frac{-r_{ij} \frac{d^2}{dy_i dx_k} a_{ijk} + \frac{d}{dx_k} a_{ijk} \frac{d}{dy_i} r_{ij}}{r_{ij}^2 r_{kj} \sqrt{-\frac{a_{ijk}^2}{r_{ij}^2 r_{kj}^2} + 1}} - \frac{\left( a_{ijk} \frac{d}{dy_i} r_{ij} - r_{ij} \frac{d}{dy_i} a_{ijk} \right) \frac{d}{dx_k} r_{kj}}{r_{ij}^2 r_{kj}^2 \sqrt{-\frac{a_{ijk}^2}{r_{ij}^2 r_{kj}^2} + 1}} \quad (139)$$

$$\frac{d^2}{dy_k dy_i} \alpha_{ijk} = \frac{\left( a_{ijk} \frac{d}{dy_i} r_{ij} - r_{ij} \frac{d}{dy_i} a_{ijk} \right) \left( -\frac{a_{ijk}^2 \frac{d}{dy_k} r_{kj}}{r_{ij}^2 r_{kj}^3} + \frac{a_{ijk} \frac{d}{dy_k} a_{ijk}}{r_{ij}^2 r_{kj}^2} \right)}{r_{ij}^2 r_{kj} \left( -\frac{a_{ijk}^2}{r_{ij}^2 r_{kj}^2} + 1 \right)^{\frac{3}{2}}} + \frac{-r_{ij} \frac{d^2}{dy_k dy_i} a_{ijk} + \frac{d}{dy_k} a_{ijk} \frac{d}{dy_i} r_{ij}}{r_{ij}^2 r_{kj} \sqrt{-\frac{a_{ijk}^2}{r_{ij}^2 r_{kj}^2} + 1}} - \frac{\left( a_{ijk} \frac{d}{dy_i} r_{ij} - r_{ij} \frac{d}{dy_i} a_{ijk} \right) \frac{d}{dy_k} r_{kj}}{r_{ij}^2 r_{kj}^2 \sqrt{-\frac{a_{ijk}^2}{r_{ij}^2 r_{kj}^2} + 1}} \quad (140)$$

$$\frac{d^2}{dz_k dy_i} \alpha_{ijk} = \frac{\left( a_{ijk} \frac{d}{dy_i} r_{ij} - r_{ij} \frac{d}{dy_i} a_{ijk} \right) \left( -\frac{a_{ijk}^2 \frac{d}{dz_k} r_{kj}}{r_{ij}^2 r_{kj}^3} + \frac{a_{ijk} \frac{d}{dz_k} a_{ijk}}{r_{ij}^2 r_{kj}^2} \right)}{r_{ij}^2 r_{kj} \left( -\frac{a_{ijk}^2}{r_{ij}^2 r_{kj}^2} + 1 \right)^{\frac{3}{2}}} + \frac{-r_{ij} \frac{d^2}{dz_k dy_i} a_{ijk} + \frac{d}{dz_k} a_{ijk} \frac{d}{dy_i} r_{ij}}{r_{ij}^2 r_{kj} \sqrt{-\frac{a_{ijk}^2}{r_{ij}^2 r_{kj}^2} + 1}} - \frac{\left( a_{ijk} \frac{d}{dy_i} r_{ij} - r_{ij} \frac{d}{dy_i} a_{ijk} \right) \frac{d}{dz_k} r_{kj}}{r_{ij}^2 r_{kj}^2 \sqrt{-\frac{a_{ijk}^2}{r_{ij}^2 r_{kj}^2} + 1}} \quad (141)$$

$$\frac{d^2}{dz_i^2} \alpha_{ijk} = \frac{\left( a_{ijk} \frac{d}{dz_i} r_{ij} - r_{ij} \frac{d}{dz_i} a_{ijk} \right) \left( -\frac{a_{ijk}^2 \frac{d}{dz_i} r_{ij}}{r_{ij}^3 r_{kj}^2} + \frac{a_{ijk} \frac{d}{dz_i} a_{ijk}}{r_{ij}^2 r_{kj}^2} \right)}{r_{ij}^2 r_{kj} \left( -\frac{a_{ijk}^2}{r_{ij}^2 r_{kj}^2} + 1 \right)^{\frac{3}{2}}} + \frac{a_{ijk} \frac{d^2}{dz_i^2} r_{ij} - r_{ij} \frac{d^2}{dz_i^2} a_{ijk}}{r_{ij}^2 r_{kj} \sqrt{-\frac{a_{ijk}^2}{r_{ij}^2 r_{kj}^2} + 1}} - \frac{2 \left( a_{ijk} \frac{d}{dz_i} r_{ij} - r_{ij} \frac{d}{dz_i} a_{ijk} \right) \frac{d}{dz_i} r_{ij}}{r_{ij}^3 r_{kj} \sqrt{-\frac{a_{ijk}^2}{r_{ij}^2 r_{kj}^2} + 1}} \quad (142)$$

$$\frac{d^2}{dx_j dz_i} \alpha_{ijk} = \frac{\left( a_{ijk} \frac{d}{dz_i} r_{ij} - r_{ij} \frac{d}{dz_i} a_{ijk} \right) \left( -\frac{a_{ijk}^2 \frac{d}{dx_j} r_{kj}}{r_{ij}^2 r_{kj}^3} - \frac{a_{ijk}^2 \frac{d}{dx_j} r_{ij}}{r_{ij}^3 r_{kj}^2} + \frac{a_{ijk} \frac{d}{dx_j} a_{ijk}}{r_{ij}^2 r_{kj}^2} \right)}{r_{ij}^2 r_{kj} \left( -\frac{a_{ijk}^2}{r_{ij}^2 r_{kj}^2} + 1 \right)^{\frac{3}{2}}} + \frac{a_{ijk} \frac{d^2}{dz_i dx_j} r_{ij} - r_{ij} \frac{d^2}{dz_i dx_j} a_{ijk} + \frac{d}{dx_j} a_{ijk} \frac{d}{dz_i} r_{ij} - \frac{d}{dz_i} a_{ijk} \frac{d}{dx_j} r_{ij}}{r_{ij}^2 r_{kj} \sqrt{-\frac{a_{ijk}^2}{r_{ij}^2 r_{kj}^2} + 1}} \quad (143)$$

$$- \frac{\left( a_{ijk} \frac{d}{dz_i} r_{ij} - r_{ij} \frac{d}{dz_i} a_{ijk} \right) \frac{d}{dx_j} r_{kj}}{r_{ij}^2 r_{kj}^2 \sqrt{-\frac{a_{ijk}^2}{r_{ij}^2 r_{kj}^2} + 1}} - \frac{2 \left( a_{ijk} \frac{d}{dz_i} r_{ij} - r_{ij} \frac{d}{dz_i} a_{ijk} \right) \frac{d}{dx_j} r_{ij}}{r_{ij}^3 r_{kj} \sqrt{-\frac{a_{ijk}^2}{r_{ij}^2 r_{kj}^2} + 1}}$$

$$\frac{d^2}{dy_j dz_i} \alpha_{ijk} = \frac{\left( a_{ijk} \frac{d}{dz_i} r_{ij} - r_{ij} \frac{d}{dz_i} a_{ijk} \right) \left( -\frac{a_{ijk}^2 \frac{d}{dy_j} r_{kj}}{r_{ij}^2 r_{kj}^3} - \frac{a_{ijk}^2 \frac{d}{dy_j} r_{ij}}{r_{ij}^3 r_{kj}^2} + \frac{a_{ijk} \frac{d}{dy_j} a_{ijk}}{r_{ij}^2 r_{kj}^2} \right)}{r_{ij}^2 r_{kj} \left( -\frac{a_{ijk}^2}{r_{ij}^2 r_{kj}^2} + 1 \right)^{\frac{3}{2}}} + \frac{a_{ijk} \frac{d^2}{dz_i dy_j} r_{ij} - r_{ij} \frac{d^2}{dz_i dy_j} a_{ijk} + \frac{d}{dy_j} a_{ijk} \frac{d}{dz_i} r_{ij} - \frac{d}{dz_i} a_{ijk} \frac{d}{dy_j} r_{ij}}{r_{ij}^2 r_{kj} \sqrt{-\frac{a_{ijk}^2}{r_{ij}^2 r_{kj}^2} + 1}} \quad (144)$$

$$- \frac{\left( a_{ijk} \frac{d}{dz_i} r_{ij} - r_{ij} \frac{d}{dz_i} a_{ijk} \right) \frac{d}{dy_j} r_{kj}}{r_{ij}^2 r_{kj}^2 \sqrt{-\frac{a_{ijk}^2}{r_{ij}^2 r_{kj}^2} + 1}} - \frac{2 \left( a_{ijk} \frac{d}{dz_i} r_{ij} - r_{ij} \frac{d}{dz_i} a_{ijk} \right) \frac{d}{dy_j} r_{ij}}{r_{ij}^3 r_{kj} \sqrt{-\frac{a_{ijk}^2}{r_{ij}^2 r_{kj}^2} + 1}}$$

$$\frac{d^2}{dz_j dz_i} \alpha_{ijk} = \frac{\left( a_{ijk} \frac{d}{dz_i} r_{ij} - r_{ij} \frac{d}{dz_i} a_{ijk} \right) \left( -\frac{a_{ijk}^2 \frac{d}{dz_j} r_{kj}}{r_{ij}^2 r_{kj}^3} - \frac{a_{ijk}^2 \frac{d}{dz_j} r_{ij}}{r_{ij}^3 r_{kj}^2} + \frac{a_{ijk} \frac{d}{dz_j} a_{ijk}}{r_{ij}^2 r_{kj}^2} \right)}{r_{ij}^2 r_{kj} \left( -\frac{a_{ijk}^2}{r_{ij}^2 r_{kj}^2} + 1 \right)^{\frac{3}{2}}} + \frac{a_{ijk} \frac{d^2}{dz_j dz_i} r_{ij} - r_{ij} \frac{d^2}{dz_j dz_i} a_{ijk} - \frac{d}{dz_i} a_{ijk} \frac{d}{dz_j} r_{ij} + \frac{d}{dz_j} a_{ijk} \frac{d}{dz_i} r_{ij}}{r_{ij}^2 r_{kj} \sqrt{-\frac{a_{ijk}^2}{r_{ij}^2 r_{kj}^2} + 1}} \quad (145)$$

$$- \frac{\left( a_{ijk} \frac{d}{dz_i} r_{ij} - r_{ij} \frac{d}{dz_i} a_{ijk} \right) \frac{d}{dz_j} r_{kj}}{r_{ij}^2 r_{kj}^2 \sqrt{-\frac{a_{ijk}^2}{r_{ij}^2 r_{kj}^2} + 1}} - \frac{2 \left( a_{ijk} \frac{d}{dz_i} r_{ij} - r_{ij} \frac{d}{dz_i} a_{ijk} \right) \frac{d}{dz_j} r_{ij}}{r_{ij}^3 r_{kj} \sqrt{-\frac{a_{ijk}^2}{r_{ij}^2 r_{kj}^2} + 1}}$$

$$\frac{d^2}{dx_k dz_i} \alpha_{ijk} = \frac{\left( a_{ijk} \frac{d}{dz_i} r_{ij} - r_{ij} \frac{d}{dz_i} a_{ijk} \right) \left( -\frac{a_{ijk}^2 \frac{d}{dx_k} r_{kj}}{r_{ij}^2 r_{kj}^3} + \frac{a_{ijk} \frac{d}{dx_k} a_{ijk}}{r_{ij}^2 r_{kj}^2} \right)}{r_{ij}^2 r_{kj} \left( -\frac{a_{ijk}^2}{r_{ij}^2 r_{kj}^2} + 1 \right)^{\frac{3}{2}}} + \frac{-r_{ij} \frac{d^2}{dz_i dx_k} a_{ijk} + \frac{d}{dx_k} a_{ijk} \frac{d}{dz_i} r_{ij}}{r_{ij}^2 r_{kj} \sqrt{-\frac{a_{ijk}^2}{r_{ij}^2 r_{kj}^2} + 1}} - \frac{\left( a_{ijk} \frac{d}{dz_i} r_{ij} - r_{ij} \frac{d}{dz_i} a_{ijk} \right) \frac{d}{dx_k} r_{kj}}{r_{ij}^2 r_{kj}^2 \sqrt{-\frac{a_{ijk}^2}{r_{ij}^2 r_{kj}^2} + 1}} \quad (146)$$

$$\frac{d^2}{dy_k dz_i} \alpha_{ijk} = \frac{\left( a_{ijk} \frac{d}{dz_i} r_{ij} - r_{ij} \frac{d}{dz_i} a_{ijk} \right) \left( -\frac{a_{ijk}^2 \frac{d}{dy_k} r_{kj}}{r_{ij}^2 r_{kj}^3} + \frac{a_{ijk} \frac{d}{dy_k} a_{ijk}}{r_{ij}^2 r_{kj}^2} \right)}{r_{ij}^2 r_{kj} \left( -\frac{a_{ijk}^2}{r_{ij}^2 r_{kj}^2} + 1 \right)^{\frac{3}{2}}} + \frac{-r_{ij} \frac{d^2}{dz_i dy_k} a_{ijk} + \frac{d}{dy_k} a_{ijk} \frac{d}{dz_i} r_{ij}}{r_{ij}^2 r_{kj} \sqrt{-\frac{a_{ijk}^2}{r_{ij}^2 r_{kj}^2} + 1}} - \frac{\left( a_{ijk} \frac{d}{dz_i} r_{ij} - r_{ij} \frac{d}{dz_i} a_{ijk} \right) \frac{d}{dy_k} r_{kj}}{r_{ij}^2 r_{kj}^2 \sqrt{-\frac{a_{ijk}^2}{r_{ij}^2 r_{kj}^2} + 1}} \quad (147)$$

$$\frac{d^2}{dz_k dz_i} \alpha_{ijk} = \frac{\left( a_{ijk} \frac{d}{dz_i} r_{ij} - r_{ij} \frac{d}{dz_i} a_{ijk} \right) \left( -\frac{a_{ijk}^2 \frac{d}{dz_k} r_{kj}}{r_{ij}^2 r_{kj}^3} + \frac{a_{ijk} \frac{d}{dz_k} a_{ijk}}{r_{ij}^2 r_{kj}^2} \right)}{r_{ij}^2 r_{kj} \left( -\frac{a_{ijk}^2}{r_{ij}^2 r_{kj}^2} + 1 \right)^{\frac{3}{2}}} + \frac{-r_{ij} \frac{d^2}{dz_k dz_i} a_{ijk} + \frac{d}{dz_k} a_{ijk} \frac{d}{dz_i} r_{ij}}{r_{ij}^2 r_{kj} \sqrt{-\frac{a_{ijk}^2}{r_{ij}^2 r_{kj}^2} + 1}} - \frac{\left( a_{ijk} \frac{d}{dz_i} r_{ij} - r_{ij} \frac{d}{dz_i} a_{ijk} \right) \frac{d}{dz_k} r_{kj}}{r_{ij}^2 r_{kj}^2 \sqrt{-\frac{a_{ijk}^2}{r_{ij}^2 r_{kj}^2} + 1}} \quad (148)$$

$$\begin{aligned} \frac{d^2}{dx_j^2} \alpha_{ijk} &= \frac{a_{ijk} r_{ij} \frac{d^2}{dx_j^2} r_{kj} + a_{ijk} r_{kj} \frac{d^2}{dx_j^2} r_{ij} + 2a_{ijk} \frac{d}{dx_j} r_{ij} \frac{d}{dx_j} r_{kj} - r_{ij} r_{kj} \frac{d^2}{dx_j^2} a_{ijk}}{r_{ij}^2 r_{kj}^2 \sqrt{-\frac{a_{ijk}^2}{r_{ij}^2 r_{kj}^2} + 1}} \\ &+ \frac{\left( a_{ijk} r_{ij} \frac{d}{dx_j} r_{kj} + a_{ijk} r_{kj} \frac{d}{dx_j} r_{ij} - r_{ij} r_{kj} \frac{d}{dx_j} a_{ijk} \right) \left( -\frac{a_{ijk}^2 \frac{d}{dx_j} r_{kj}}{r_{ij}^2 r_{kj}^3} - \frac{a_{ijk}^2 \frac{d}{dx_j} r_{ij}}{r_{ij}^3 r_{kj}^2} + \frac{a_{ijk} \frac{d}{dx_j} a_{ijk}}{r_{ij}^2 r_{kj}^2} \right)}{r_{ij}^2 r_{kj}^2 \left( -\frac{a_{ijk}^2}{r_{ij}^2 r_{kj}^2} + 1 \right)^{\frac{3}{2}}} \\ &- \frac{2 \left( a_{ijk} r_{ij} \frac{d}{dx_j} r_{kj} + a_{ijk} r_{kj} \frac{d}{dx_j} r_{ij} - r_{ij} r_{kj} \frac{d}{dx_j} a_{ijk} \right) \frac{d}{dx_j} r_{kj}}{r_{ij}^2 r_{kj}^3 \sqrt{-\frac{a_{ijk}^2}{r_{ij}^2 r_{kj}^2} + 1}} - \frac{2 \left( a_{ijk} r_{ij} \frac{d}{dx_j} r_{kj} + a_{ijk} r_{kj} \frac{d}{dx_j} r_{ij} - r_{ij} r_{kj} \frac{d}{dx_j} a_{ijk} \right) \frac{d}{dx_j} r_{ij}}{r_{ij}^3 r_{kj}^2 \sqrt{-\frac{a_{ijk}^2}{r_{ij}^2 r_{kj}^2} + 1}} \end{aligned} \quad (149)$$

$$\begin{aligned}
\frac{d^2}{dy_j dx_j} \alpha_{ijk} = & \frac{a_{ijk} r_{ij} \frac{d^2}{dy_j dx_j} r_{kj} + a_{ijk} r_{kj} \frac{d^2}{dy_j dx_j} r_{ij} + a_{ijk} \frac{d}{dx_j} r_{ij} \frac{d}{dy_j} r_{kj} + a_{ijk} \frac{d}{dy_j} r_{ij} \frac{d}{dx_j} r_{kj} - r_{ij} r_{kj} \frac{d^2}{dy_j dx_j} a_{ijk}}{r_{ij}^2 r_{kj}^2 \sqrt{-\frac{a_{ijk}^2}{r_{ij}^2 r_{kj}^2}}} \\
& + \frac{-r_{ij} \frac{d}{dx_j} a_{ijk} \frac{d}{dy_j} r_{kj} + r_{ij} \frac{d}{dy_j} a_{ijk} \frac{d}{dx_j} r_{kj} - r_{kj} \frac{d}{dx_j} a_{ijk} \frac{d}{dy_j} r_{ij} + r_{kj} \frac{d}{dy_j} a_{ijk} \frac{d}{dx_j} r_{ij}}{r_{ij}^2 r_{kj}^2 \sqrt{-\frac{a_{ijk}^2}{r_{ij}^2 r_{kj}^2} + 1}} \\
& + \frac{\left( a_{ijk} r_{ij} \frac{d}{dx_j} r_{kj} + a_{ijk} r_{kj} \frac{d}{dx_j} r_{ij} - r_{ij} r_{kj} \frac{d}{dx_j} a_{ijk} \right) \left( -\frac{a_{ijk}^2 \frac{d}{dy_j} r_{kj}}{r_{ij}^2 r_{kj}^3} - \frac{a_{ijk}^2 \frac{d}{dy_j} r_{ij}}{r_{ij}^3 r_{kj}^2} + \frac{a_{ijk} \frac{d}{dy_j} a_{ijk}}{r_{ij}^2 r_{kj}^2} \right)}{r_{ij}^2 r_{kj}^2 \left( -\frac{a_{ijk}^2}{r_{ij}^2 r_{kj}^2} + 1 \right)^{\frac{3}{2}}} \\
& - \frac{2 \left( a_{ijk} r_{ij} \frac{d}{dx_j} r_{kj} + a_{ijk} r_{kj} \frac{d}{dx_j} r_{ij} - r_{ij} r_{kj} \frac{d}{dx_j} a_{ijk} \right) \frac{d}{dy_j} r_{kj}}{r_{ij}^2 r_{kj}^3 \sqrt{-\frac{a_{ijk}^2}{r_{ij}^2 r_{kj}^2} + 1}} \\
& - \frac{2 \left( a_{ijk} r_{ij} \frac{d}{dx_j} r_{kj} + a_{ijk} r_{kj} \frac{d}{dx_j} r_{ij} - r_{ij} r_{kj} \frac{d}{dx_j} a_{ijk} \right) \frac{d}{dy_j} r_{ij}}{r_{ij}^3 r_{kj}^2 \sqrt{-\frac{a_{ijk}^2}{r_{ij}^2 r_{kj}^2} + 1}}
\end{aligned} \tag{150}$$

$$\begin{aligned}
\frac{d^2}{dz_j dx_j} \alpha_{ijk} = & \frac{a_{ijk} r_{ij} \frac{d^2}{dz_j dx_j} r_{kj} + a_{ijk} r_{kj} \frac{d^2}{dz_j dx_j} r_{ij} + a_{ijk} \frac{d}{dx_j} r_{ij} \frac{d}{dz_j} r_{kj} + a_{ijk} \frac{d}{dz_j} r_{ij} \frac{d}{dx_j} r_{kj} - r_{ij} r_{kj} \frac{d^2}{dz_j dx_j} a_{ijk}}{r_{ij}^2 r_{kj}^2 \sqrt{-\frac{a_{ijk}^2}{r_{ij}^2 r_{kj}^2} + 1}} \\
& + \frac{-r_{ij} \frac{d}{dx_j} a_{ijk} \frac{d}{dz_j} r_{kj} + r_{ij} \frac{d}{dz_j} a_{ijk} \frac{d}{dx_j} r_{kj} - r_{kj} \frac{d}{dx_j} a_{ijk} \frac{d}{dz_j} r_{ij} + r_{kj} \frac{d}{dz_j} a_{ijk} \frac{d}{dx_j} r_{ij}}{r_{ij}^2 r_{kj}^2 \sqrt{-\frac{a_{ijk}^2}{r_{ij}^2 r_{kj}^2} + 1}} \\
& + \frac{\left( a_{ijk} r_{ij} \frac{d}{dx_j} r_{kj} + a_{ijk} r_{kj} \frac{d}{dx_j} r_{ij} - r_{ij} r_{kj} \frac{d}{dx_j} a_{ijk} \right) \left( -\frac{a_{ijk}^2 \frac{d}{dx_j} r_{kj}}{r_{ij}^2 r_{kj}^3} - \frac{a_{ijk}^2 \frac{d}{dz_j} r_{ij}}{r_{ij}^3 r_{kj}^2} + \frac{a_{ijk} \frac{d}{dz_j} a_{ijk}}{r_{ij}^2 r_{kj}^2} \right)}{r_{ij}^2 r_{kj}^2 \left( -\frac{a_{ijk}^2}{r_{ij}^2 r_{kj}^2} + 1 \right)^{\frac{3}{2}}} \\
& - \frac{2 \left( a_{ijk} r_{ij} \frac{d}{dx_j} r_{kj} + a_{ijk} r_{kj} \frac{d}{dx_j} r_{ij} - r_{ij} r_{kj} \frac{d}{dx_j} a_{ijk} \right) \frac{d}{dz_j} r_{kj}}{r_{ij}^2 r_{kj}^3 \sqrt{-\frac{a_{ijk}^2}{r_{ij}^2 r_{kj}^2} + 1}} \\
& - \frac{2 \left( a_{ijk} r_{ij} \frac{d}{dx_j} r_{kj} + a_{ijk} r_{kj} \frac{d}{dx_j} r_{ij} - r_{ij} r_{kj} \frac{d}{dx_j} a_{ijk} \right) \frac{d}{dz_j} r_{ij}}{r_{ij}^3 r_{kj}^2 \sqrt{-\frac{a_{ijk}^2}{r_{ij}^2 r_{kj}^2} + 1}}
\end{aligned} \tag{151}$$

$$\begin{aligned}
\frac{d^2}{dx_k dx_j} \alpha_{ijk} = & \frac{a_{ijk} r_{ij} \frac{d^2}{dx_k dx_j} r_{kj} + a_{ijk} \frac{d}{dx_j} r_{ij} \frac{d}{dx_k} r_{kj} - r_{ij} r_{kj} \frac{d^2}{dx_k dx_j} a_{ijk} - r_{ij} \frac{d}{dx_j} a_{ijk} \frac{d}{dx_k} r_{kj} + r_{ij} \frac{d}{dx_k} a_{ijk} \frac{d}{dx_j} r_{kj} + r_{kj} \frac{d}{dx_k} a_{ijk} \frac{d}{dx_j} r_{ij}}{r_{ij}^2 r_{kj}^2 \sqrt{-\frac{a_{ijk}^2}{r_{ij}^2 r_{kj}^2} + 1}} \\
& + \frac{\left( -\frac{a_{ijk}^2 \frac{d}{dx_k} r_{kj}}{r_{ij}^2 r_{kj}^3} + \frac{a_{ijk} \frac{d}{dx_k} a_{ijk}}{r_{ij}^2 r_{kj}^2} \right) \left( a_{ijk} r_{ij} \frac{d}{dx_j} r_{kj} + a_{ijk} r_{kj} \frac{d}{dx_j} r_{ij} - r_{ij} r_{kj} \frac{d}{dx_j} a_{ijk} \right)}{r_{ij}^2 r_{kj}^2 \left( -\frac{a_{ijk}^2}{r_{ij}^2 r_{kj}^2} + 1 \right)^{\frac{3}{2}}} \\
& - \frac{2 \left( a_{ijk} r_{ij} \frac{d}{dx_j} r_{kj} + a_{ijk} r_{kj} \frac{d}{dx_j} r_{ij} - r_{ij} r_{kj} \frac{d}{dx_j} a_{ijk} \right) \frac{d}{dx_k} r_{kj}}{r_{ij}^2 r_{kj}^3 \sqrt{-\frac{a_{ijk}^2}{r_{ij}^2 r_{kj}^2} + 1}}
\end{aligned} \tag{152}$$



$$\frac{d^2}{dy_k dx_j} \alpha_{ijk} = \frac{a_{ijk} r_{ij} \frac{d^2}{dy_k dx_j} r_{kj} + a_{ijk} \frac{d}{dx_j} r_{ij} \frac{d}{dy_k} r_{kj} - r_{ij} r_{kj} \frac{d^2}{dy_k dx_j} a_{ijk} - r_{ij} \frac{d}{dx_j} a_{ijk} \frac{d}{dy_k} r_{kj} + r_{ij} \frac{d}{dy_k} a_{ijk} \frac{d}{dx_j} r_{kj} + r_{kj} \frac{d}{dy_k} a_{ijk} \frac{d}{dx_j} r_{ij}}{r_{ij}^2 r_{kj}^2 \sqrt{-\frac{a_{ijk}^2}{r_{ij}^2 r_{kj}^2} + 1}} \quad (153)$$

$$+ \frac{\left( -\frac{a_{ijk}^2 \frac{d}{dy_k} r_{kj}}{r_{ij}^2 r_{kj}^3} + \frac{a_{ijk} \frac{d}{dy_k} a_{ijk}}{r_{ij}^2 r_{kj}^2} \right) \left( a_{ijk} r_{ij} \frac{d}{dx_j} r_{kj} + a_{ijk} r_{kj} \frac{d}{dx_j} r_{ij} - r_{ij} r_{kj} \frac{d}{dx_j} a_{ijk} \right)}{r_{ij}^2 r_{kj}^2 \left( -\frac{a_{ijk}^2}{r_{ij}^2 r_{kj}^2} + 1 \right)^{\frac{3}{2}}}$$

$$- \frac{2 \left( a_{ijk} r_{ij} \frac{d}{dx_j} r_{kj} + a_{ijk} r_{kj} \frac{d}{dx_j} r_{ij} - r_{ij} r_{kj} \frac{d}{dx_j} a_{ijk} \right) \frac{d}{dy_k} r_{kj}}{r_{ij}^2 r_{kj}^3 \sqrt{-\frac{a_{ijk}^2}{r_{ij}^2 r_{kj}^2} + 1}}$$

$$\frac{d^2}{dz_k dx_j} \alpha_{ijk} = \frac{a_{ijk} r_{ij} \frac{d^2}{dz_k dx_j} r_{kj} + a_{ijk} \frac{d}{dx_j} r_{ij} \frac{d}{dz_k} r_{kj} - r_{ij} r_{kj} \frac{d^2}{dz_k dx_j} a_{ijk} - r_{ij} \frac{d}{dx_j} a_{ijk} \frac{d}{dz_k} r_{kj} + r_{ij} \frac{d}{dz_k} a_{ijk} \frac{d}{dx_j} r_{kj} + r_{kj} \frac{d}{dz_k} a_{ijk} \frac{d}{dx_j} r_{ij}}{r_{ij}^2 r_{kj}^2 \sqrt{-\frac{a_{ijk}^2}{r_{ij}^2 r_{kj}^2} + 1}} \quad (154)$$

$$+ \frac{\left( -\frac{a_{ijk}^2 \frac{d}{dz_k} r_{kj}}{r_{ij}^2 r_{kj}^3} + \frac{a_{ijk} \frac{d}{dz_k} a_{ijk}}{r_{ij}^2 r_{kj}^2} \right) \left( a_{ijk} r_{ij} \frac{d}{dx_j} r_{kj} + a_{ijk} r_{kj} \frac{d}{dx_j} r_{ij} - r_{ij} r_{kj} \frac{d}{dx_j} a_{ijk} \right)}{r_{ij}^2 r_{kj}^2 \left( -\frac{a_{ijk}^2}{r_{ij}^2 r_{kj}^2} + 1 \right)^{\frac{3}{2}}}$$

$$- \frac{2 \left( a_{ijk} r_{ij} \frac{d}{dx_j} r_{kj} + a_{ijk} r_{kj} \frac{d}{dx_j} r_{ij} - r_{ij} r_{kj} \frac{d}{dx_j} a_{ijk} \right) \frac{d}{dz_k} r_{kj}}{r_{ij}^2 r_{kj}^3 \sqrt{-\frac{a_{ijk}^2}{r_{ij}^2 r_{kj}^2} + 1}}$$

$$\frac{d^2}{dy_j^2} \alpha_{ijk} = \frac{a_{ijk} r_{ij} \frac{d^2}{dy_j^2} r_{kj} + a_{ijk} r_{kj} \frac{d^2}{dy_j^2} r_{ij} + 2a_{ijk} \frac{d}{dy_j} r_{ij} \frac{d}{dy_j} r_{kj} - r_{ij} r_{kj} \frac{d^2}{dy_j^2} a_{ijk}}{r_{ij}^2 r_{kj}^2 \sqrt{-\frac{a_{ijk}^2}{r_{ij}^2 r_{kj}^2} + 1}} \quad (155)$$

$$+ \frac{\left( a_{ijk} r_{ij} \frac{d}{dy_j} r_{kj} + a_{ijk} r_{kj} \frac{d}{dy_j} r_{ij} - r_{ij} r_{kj} \frac{d}{dy_j} a_{ijk} \right) \left( -\frac{a_{ijk}^2 \frac{d}{dy_j} r_{kj}}{r_{ij}^2 r_{kj}^3} - \frac{a_{ijk}^2 \frac{d}{dy_j} r_{ij}}{r_{ij}^3 r_{kj}^2} + \frac{a_{ijk} \frac{d}{dy_j} a_{ijk}}{r_{ij}^2 r_{kj}^2} \right)}{r_{ij}^2 r_{kj}^2 \left( -\frac{a_{ijk}^2}{r_{ij}^2 r_{kj}^2} + 1 \right)^{\frac{3}{2}}}$$

$$- \frac{2 \left( a_{ijk} r_{ij} \frac{d}{dy_j} r_{kj} + a_{ijk} r_{kj} \frac{d}{dy_j} r_{ij} - r_{ij} r_{kj} \frac{d}{dy_j} a_{ijk} \right) \frac{d}{dy_j} r_{kj}}{r_{ij}^2 r_{kj}^3 \sqrt{-\frac{a_{ijk}^2}{r_{ij}^2 r_{kj}^2} + 1}} - \frac{2 \left( a_{ijk} r_{ij} \frac{d}{dy_j} r_{kj} + a_{ijk} r_{kj} \frac{d}{dy_j} r_{ij} - r_{ij} r_{kj} \frac{d}{dy_j} a_{ijk} \right) \frac{d}{dy_j} r_{ij}}{r_{ij}^3 r_{kj}^2 \sqrt{-\frac{a_{ijk}^2}{r_{ij}^2 r_{kj}^2} + 1}}$$

$$\begin{aligned}
\frac{d^2}{dz_j dy_j} \alpha_{ijk} = & \frac{a_{ijk} r_{ij} \frac{d^2}{dz_j dy_j} r_{kj} + a_{ijk} r_{kj} \frac{d^2}{dz_j dy_j} r_{ij} + a_{ijk} \frac{d}{dy_j} r_{ij} \frac{d}{dz_j} r_{kj} + a_{ijk} \frac{d}{dz_j} r_{ij} \frac{d}{dy_j} r_{kj}}{r_{ij}^2 r_{kj}^2 \sqrt{-\frac{a_{ijk}^2}{r_{ij}^2 r_{kj}^2} + 1}} \\
& - \frac{r_{ij} r_{kj} \frac{d^2}{dz_j dy_j} a_{ijk} - r_{ij} \frac{d}{dy_j} a_{ijk} \frac{d}{dz_j} r_{kj} + r_{ij} \frac{d}{dz_j} a_{ijk} \frac{d}{dy_j} r_{kj} - r_{kj} \frac{d}{dy_j} a_{ijk} \frac{d}{dz_j} r_{ij} + r_{kj} \frac{d}{dz_j} a_{ijk} \frac{d}{dy_j} r_{ij}}{r_{ij}^2 r_{kj}^2 \sqrt{-\frac{a_{ijk}^2}{r_{ij}^2 r_{kj}^2} + 1}} \\
& + \frac{\left( a_{ijk} r_{ij} \frac{d}{dy_j} r_{kj} + a_{ijk} r_{kj} \frac{d}{dy_j} r_{ij} - r_{ij} r_{kj} \frac{d}{dy_j} a_{ijk} \right) \left( -\frac{a_{ijk}^2 \frac{d}{dz_j} r_{kj}}{r_{ij}^2 r_{kj}^3} - \frac{a_{ijk}^2 \frac{d}{dz_j} r_{ij}}{r_{ij}^3 r_{kj}^2} + \frac{a_{ijk} \frac{d}{dz_j} a_{ijk}}{r_{ij}^2 r_{kj}^2} \right)}{r_{ij}^2 r_{kj}^2 \left( -\frac{a_{ijk}^2}{r_{ij}^2 r_{kj}^2} + 1 \right)^{\frac{3}{2}}} \\
& - \frac{2 \left( a_{ijk} r_{ij} \frac{d}{dy_j} r_{kj} + a_{ijk} r_{kj} \frac{d}{dy_j} r_{ij} - r_{ij} r_{kj} \frac{d}{dy_j} a_{ijk} \right) \frac{d}{dz_j} r_{kj}}{r_{ij}^2 r_{kj}^3 \sqrt{-\frac{a_{ijk}^2}{r_{ij}^2 r_{kj}^2} + 1}} \\
& - \frac{2 \left( a_{ijk} r_{ij} \frac{d}{dy_j} r_{kj} + a_{ijk} r_{kj} \frac{d}{dy_j} r_{ij} - r_{ij} r_{kj} \frac{d}{dy_j} a_{ijk} \right) \frac{d}{dz_j} r_{ij}}{r_{ij}^3 r_{kj}^2 \sqrt{-\frac{a_{ijk}^2}{r_{ij}^2 r_{kj}^2} + 1}}
\end{aligned} \tag{156}$$

$$\begin{aligned}
\frac{d^2}{dx_k dy_j} \alpha_{ijk} = & \frac{a_{ijk} r_{ij} \frac{d^2}{dy_j dx_k} r_{kj} + a_{ijk} \frac{d}{dy_j} r_{ij} \frac{d}{dx_k} r_{kj} - r_{ij} r_{kj} \frac{d^2}{dy_j dx_k} a_{ijk} + r_{ij} \frac{d}{dx_k} a_{ijk} \frac{d}{dy_j} r_{kj} - r_{ij} \frac{d}{dy_j} a_{ijk} \frac{d}{dx_k} r_{kj} + r_{kj} \frac{d}{dx_k} a_{ijk} \frac{d}{dy_j} r_{ij}}{r_{ij}^2 r_{kj}^2 \sqrt{-\frac{a_{ijk}^2}{r_{ij}^2 r_{kj}^2} + 1}} \\
& + \frac{\left( -\frac{a_{ijk}^2 \frac{d}{dx_k} r_{kj}}{r_{ij}^2 r_{kj}^3} + \frac{a_{ijk} \frac{d}{dx_k} a_{ijk}}{r_{ij}^2 r_{kj}^2} \right) \left( a_{ijk} r_{ij} \frac{d}{dy_j} r_{kj} + a_{ijk} r_{kj} \frac{d}{dy_j} r_{ij} - r_{ij} r_{kj} \frac{d}{dy_j} a_{ijk} \right)}{r_{ij}^2 r_{kj}^2 \left( -\frac{a_{ijk}^2}{r_{ij}^2 r_{kj}^2} + 1 \right)^{\frac{3}{2}}} - \frac{2 \left( a_{ijk} r_{ij} \frac{d}{dy_j} r_{kj} + a_{ijk} r_{kj} \frac{d}{dy_j} r_{ij} - r_{ij} r_{kj} \frac{d}{dy_j} a_{ijk} \right) \frac{d}{dx_k} r_{kj}}{r_{ij}^2 r_{kj}^3 \sqrt{-\frac{a_{ijk}^2}{r_{ij}^2 r_{kj}^2} + 1}}
\end{aligned} \tag{157}$$

$$\begin{aligned}
\frac{d^2}{dy_k dy_j} \alpha_{ijk} = & \frac{a_{ijk} r_{ij} \frac{d^2}{dy_k dy_j} r_{kj} + a_{ijk} \frac{d}{dy_j} r_{ij} \frac{d}{dy_k} r_{kj} - r_{ij} r_{kj} \frac{d^2}{dy_k dy_j} a_{ijk} - r_{ij} \frac{d}{dy_j} a_{ijk} \frac{d}{dy_k} r_{kj} + r_{ij} \frac{d}{dy_k} a_{ijk} \frac{d}{dy_j} r_{kj} + r_{kj} \frac{d}{dy_k} a_{ijk} \frac{d}{dy_j} r_{ij}}{r_{ij}^2 r_{kj}^2 \sqrt{-\frac{a_{ijk}^2}{r_{ij}^2 r_{kj}^2} + 1}} \\
& + \frac{\left( -\frac{a_{ijk}^2 \frac{d}{dy_k} r_{kj}}{r_{ij}^2 r_{kj}^3} + \frac{a_{ijk} \frac{d}{dy_k} a_{ijk}}{r_{ij}^2 r_{kj}^2} \right) \left( a_{ijk} r_{ij} \frac{d}{dy_j} r_{kj} + a_{ijk} r_{kj} \frac{d}{dy_j} r_{ij} - r_{ij} r_{kj} \frac{d}{dy_j} a_{ijk} \right)}{r_{ij}^2 r_{kj}^2 \left( -\frac{a_{ijk}^2}{r_{ij}^2 r_{kj}^2} + 1 \right)^{\frac{3}{2}}} - \frac{2 \left( a_{ijk} r_{ij} \frac{d}{dy_j} r_{kj} + a_{ijk} r_{kj} \frac{d}{dy_j} r_{ij} - r_{ij} r_{kj} \frac{d}{dy_j} a_{ijk} \right) \frac{d}{dy_k} r_{kj}}{r_{ij}^2 r_{kj}^3 \sqrt{-\frac{a_{ijk}^2}{r_{ij}^2 r_{kj}^2} + 1}}
\end{aligned} \tag{158}$$

$$\frac{d^2}{dz_k dy_j} \alpha_{ijk} = \frac{a_{ijk} r_{ij} \frac{d^2}{dz_k dy_j} r_{kj} + a_{ijk} \frac{d}{dy_j} r_{ij} \frac{d}{dz_k} r_{kj} - r_{ij} r_{kj} \frac{d^2}{dz_k dy_j} a_{ijk} - r_{ij} \frac{d}{dy_j} a_{ijk} \frac{d}{dz_k} r_{kj} + r_{ij} \frac{d}{dz_k} a_{ijk} \frac{d}{dy_j} r_{kj} + r_{kj} \frac{d}{dz_k} a_{ijk} \frac{d}{dy_j} r_{ij}}{r_{ij}^2 r_{kj}^2 \sqrt{-\frac{a_{ijk}^2}{r_{ij}^2 r_{kj}^2} + 1}} \quad (159)$$

$$+ \frac{\left(-\frac{a_{ijk}^2 \frac{d}{dz_k} r_{kj}}{r_{ij}^2 r_{kj}^3} + \frac{a_{ijk} \frac{d}{dz_k} a_{ijk}}{r_{ij}^2 r_{kj}^2}\right) \left(a_{ijk} r_{ij} \frac{d}{dy_j} r_{kj} + a_{ijk} r_{kj} \frac{d}{dy_j} r_{ij} - r_{ij} r_{kj} \frac{d}{dy_j} a_{ijk}\right)}{r_{ij}^2 r_{kj}^2 \left(-\frac{a_{ijk}^2}{r_{ij}^2 r_{kj}^2} + 1\right)^{\frac{3}{2}}} - \frac{2 \left(a_{ijk} r_{ij} \frac{d}{dy_j} r_{kj} + a_{ijk} r_{kj} \frac{d}{dy_j} r_{ij} - r_{ij} r_{kj} \frac{d}{dy_j} a_{ijk}\right) \frac{d}{dz_k} r_{kj}}{r_{ij}^2 r_{kj}^3 \sqrt{-\frac{a_{ijk}^2}{r_{ij}^2 r_{kj}^2} + 1}}$$

$$\frac{d^2}{dz_j^2} \alpha_{ijk} = \frac{a_{ijk} r_{ij} \frac{d^2}{dz_j^2} r_{kj} + a_{ijk} r_{kj} \frac{d^2}{dz_j^2} r_{ij} + 2a_{ijk} \frac{d}{dz_j} r_{ij} \frac{d}{dz_j} r_{kj} - r_{ij} r_{kj} \frac{d^2}{dz_j^2} a_{ijk}}{r_{ij}^2 r_{kj}^2 \sqrt{-\frac{a_{ijk}^2}{r_{ij}^2 r_{kj}^2} + 1}} \quad (160)$$

$$+ \frac{\left(a_{ijk} r_{ij} \frac{d}{dz_j} r_{kj} + a_{ijk} r_{kj} \frac{d}{dz_j} r_{ij} - r_{ij} r_{kj} \frac{d}{dz_j} a_{ijk}\right) \left(-\frac{a_{ijk}^2 \frac{d}{dz_j} r_{kj}}{r_{ij}^2 r_{kj}^3} - \frac{a_{ijk}^2 \frac{d}{dz_j} r_{ij}}{r_{ij}^3 r_{kj}^2} + \frac{a_{ijk} \frac{d}{dz_j} a_{ijk}}{r_{ij}^2 r_{kj}^2}\right)}{r_{ij}^2 r_{kj}^2 \left(-\frac{a_{ijk}^2}{r_{ij}^2 r_{kj}^2} + 1\right)^{\frac{3}{2}}} - \frac{2 \left(a_{ijk} r_{ij} \frac{d}{dz_j} r_{kj} + a_{ijk} r_{kj} \frac{d}{dz_j} r_{ij} - r_{ij} r_{kj} \frac{d}{dz_j} a_{ijk}\right) \frac{d}{dz_j} r_{kj}}{r_{ij}^2 r_{kj}^3 \sqrt{-\frac{a_{ijk}^2}{r_{ij}^2 r_{kj}^2} + 1}} - \frac{2 \left(a_{ijk} r_{ij} \frac{d}{dz_j} r_{kj} + a_{ijk} r_{kj} \frac{d}{dz_j} r_{ij} - r_{ij} r_{kj} \frac{d}{dz_j} a_{ijk}\right) \frac{d}{dz_j} r_{ij}}{r_{ij}^3 r_{kj}^2 \sqrt{-\frac{a_{ijk}^2}{r_{ij}^2 r_{kj}^2} + 1}}$$

$$\frac{d^2}{dx_k dz_j} \alpha_{ijk} = \frac{a_{ijk} r_{ij} \frac{d^2}{dx_k dz_j} r_{kj} + a_{ijk} \frac{d}{dz_j} r_{ij} \frac{d}{dx_k} r_{kj} - r_{ij} r_{kj} \frac{d^2}{dx_k dz_j} a_{ijk} + r_{ij} \frac{d}{dx_k} a_{ijk} \frac{d}{dz_j} r_{kj} - r_{ij} \frac{d}{dz_j} a_{ijk} \frac{d}{dx_k} r_{kj} + r_{kj} \frac{d}{dx_k} a_{ijk} \frac{d}{dz_j} r_{ij}}{r_{ij}^2 r_{kj}^2 \sqrt{-\frac{a_{ijk}^2}{r_{ij}^2 r_{kj}^2} + 1}} \quad (161)$$

$$+ \frac{\left(-\frac{a_{ijk}^2 \frac{d}{dx_k} r_{kj}}{r_{ij}^2 r_{kj}^3} + \frac{a_{ijk} \frac{d}{dx_k} a_{ijk}}{r_{ij}^2 r_{kj}^2}\right) \left(a_{ijk} r_{ij} \frac{d}{dz_j} r_{kj} + a_{ijk} r_{kj} \frac{d}{dz_j} r_{ij} - r_{ij} r_{kj} \frac{d}{dz_j} a_{ijk}\right)}{r_{ij}^2 r_{kj}^2 \left(-\frac{a_{ijk}^2}{r_{ij}^2 r_{kj}^2} + 1\right)^{\frac{3}{2}}} - \frac{2 \left(a_{ijk} r_{ij} \frac{d}{dz_j} r_{kj} + a_{ijk} r_{kj} \frac{d}{dz_j} r_{ij} - r_{ij} r_{kj} \frac{d}{dz_j} a_{ijk}\right) \frac{d}{dx_k} r_{kj}}{r_{ij}^2 r_{kj}^3 \sqrt{-\frac{a_{ijk}^2}{r_{ij}^2 r_{kj}^2} + 1}}$$

$$\frac{d^2}{dy_k dz_j} \alpha_{ijk} = \frac{a_{ijk} r_{ij} \frac{d^2}{dy_k dz_j} r_{kj} + a_{ijk} \frac{d}{dz_j} r_{ij} \frac{d}{dy_k} r_{kj} - r_{ij} r_{kj} \frac{d^2}{dy_k dz_j} a_{ijk} + r_{ij} \frac{d}{dy_k} a_{ijk} \frac{d}{dz_j} r_{kj} - r_{ij} \frac{d}{dz_j} a_{ijk} \frac{d}{dy_k} r_{kj} + r_{kj} \frac{d}{dy_k} a_{ijk} \frac{d}{dz_j} r_{ij}}{r_{ij}^2 r_{kj}^2 \sqrt{-\frac{a_{ijk}^2}{r_{ij}^2 r_{kj}^2} + 1}} \quad (162)$$

$$+ \frac{\left(-\frac{a_{ijk}^2 \frac{d}{dy_k} r_{kj}}{r_{ij}^2 r_{kj}^3} + \frac{a_{ijk} \frac{d}{dy_k} a_{ijk}}{r_{ij}^2 r_{kj}^2}\right) \left(a_{ijk} r_{ij} \frac{d}{dz_j} r_{kj} + a_{ijk} r_{kj} \frac{d}{dz_j} r_{ij} - r_{ij} r_{kj} \frac{d}{dz_j} a_{ijk}\right)}{r_{ij}^2 r_{kj}^2 \left(-\frac{a_{ijk}^2}{r_{ij}^2 r_{kj}^2} + 1\right)^{\frac{3}{2}}} - \frac{2 \left(a_{ijk} r_{ij} \frac{d}{dz_j} r_{kj} + a_{ijk} r_{kj} \frac{d}{dz_j} r_{ij} - r_{ij} r_{kj} \frac{d}{dz_j} a_{ijk}\right) \frac{d}{dy_k} r_{kj}}{r_{ij}^2 r_{kj}^3 \sqrt{-\frac{a_{ijk}^2}{r_{ij}^2 r_{kj}^2} + 1}}$$

$$\frac{d^2}{dz_k dz_j} \alpha_{ijk} = \frac{a_{ijk} r_{ij} \frac{d^2}{dz_k dz_j} r_{kj} + a_{ijk} \frac{d}{dz_j} r_{ij} \frac{d}{dz_k} r_{kj} - r_{ij} r_{kj} \frac{d^2}{dz_k dz_j} a_{ijk} - r_{ij} \frac{d}{dz_j} a_{ijk} \frac{d}{dz_k} r_{kj} + r_{ij} \frac{d}{dz_k} a_{ijk} \frac{d}{dz_j} r_{kj} + r_{kj} \frac{d}{dz_k} a_{ijk} \frac{d}{dz_j} r_{ij}}{r_{ij}^2 r_{kj}^2 \sqrt{-\frac{a_{ijk}^2}{r_{ij}^2 r_{kj}^2} + 1}} \quad (163)$$

$$+ \frac{\left(-\frac{a_{ijk}^2 \frac{d}{dz_k} r_{kj}}{r_{ij}^2 r_{kj}^3} + \frac{a_{ijk} \frac{d}{dz_k} a_{ijk}}{r_{ij}^2 r_{kj}^2}\right) \left(a_{ijk} r_{ij} \frac{d}{dz_j} r_{kj} + a_{ijk} r_{kj} \frac{d}{dz_j} r_{ij} - r_{ij} r_{kj} \frac{d}{dz_j} a_{ijk}\right) - 2 \left(a_{ijk} r_{ij} \frac{d}{dz_j} r_{kj} + a_{ijk} r_{kj} \frac{d}{dz_j} r_{ij} - r_{ij} r_{kj} \frac{d}{dz_j} a_{ijk}\right) \frac{d}{dz_k} r_{kj}}{r_{ij}^2 r_{kj}^2 \left(-\frac{a_{ijk}^2}{r_{ij}^2 r_{kj}^2} + 1\right)^{\frac{3}{2}} r_{ij}^2 r_{kj}^3 \sqrt{-\frac{a_{ijk}^2}{r_{ij}^2 r_{kj}^2} + 1}}$$

$$\frac{d^2}{dx_k^2} \alpha_{ijk} = \frac{\left(a_{ijk} \frac{d}{dx_k} r_{kj} - r_{kj} \frac{d}{dx_k} a_{ijk}\right) \left(-\frac{a_{ijk}^2 \frac{d}{dx_k} r_{kj}}{r_{ij}^2 r_{kj}^3} + \frac{a_{ijk} \frac{d}{dx_k} a_{ijk}}{r_{ij}^2 r_{kj}^2}\right)}{r_{ij} r_{kj}^2 \left(-\frac{a_{ijk}^2}{r_{ij}^2 r_{kj}^2} + 1\right)^{\frac{3}{2}}} + \frac{a_{ijk} \frac{d^2}{dx_k^2} r_{kj} - r_{kj} \frac{d^2}{dx_k^2} a_{ijk}}{r_{ij} r_{kj}^2 \sqrt{-\frac{a_{ijk}^2}{r_{ij}^2 r_{kj}^2} + 1}} - \frac{2 \left(a_{ijk} \frac{d}{dx_k} r_{kj} - r_{kj} \frac{d}{dx_k} a_{ijk}\right) \frac{d}{dx_k} r_{kj}}{r_{ij} r_{kj}^3 \sqrt{-\frac{a_{ijk}^2}{r_{ij}^2 r_{kj}^2} + 1}} \quad (164)$$

$$\frac{d^2}{dy_k dx_k} \alpha_{ijk} = \frac{\left(a_{ijk} \frac{d}{dx_k} r_{kj} - r_{kj} \frac{d}{dx_k} a_{ijk}\right) \left(-\frac{a_{ijk}^2 \frac{d}{dy_k} r_{kj}}{r_{ij}^2 r_{kj}^3} + \frac{a_{ijk} \frac{d}{dy_k} a_{ijk}}{r_{ij}^2 r_{kj}^2}\right)}{r_{ij} r_{kj}^2 \left(-\frac{a_{ijk}^2}{r_{ij}^2 r_{kj}^2} + 1\right)^{\frac{3}{2}}} \quad (165)$$

$$+ \frac{a_{ijk} \frac{d^2}{dy_k dx_k} r_{kj} - r_{kj} \frac{d^2}{dy_k dx_k} a_{ijk} - \frac{d}{dx_k} a_{ijk} \frac{d}{dy_k} r_{kj} + \frac{d}{dy_k} a_{ijk} \frac{d}{dx_k} r_{kj}}{r_{ij} r_{kj}^2 \sqrt{-\frac{a_{ijk}^2}{r_{ij}^2 r_{kj}^2} + 1}} - \frac{2 \left(a_{ijk} \frac{d}{dx_k} r_{kj} - r_{kj} \frac{d}{dx_k} a_{ijk}\right) \frac{d}{dy_k} r_{kj}}{r_{ij} r_{kj}^3 \sqrt{-\frac{a_{ijk}^2}{r_{ij}^2 r_{kj}^2} + 1}}$$

$$\frac{d^2}{dz_k dx_k} \alpha_{ijk} = \frac{\left(a_{ijk} \frac{d}{dx_k} r_{kj} - r_{kj} \frac{d}{dx_k} a_{ijk}\right) \left(-\frac{a_{ijk}^2 \frac{d}{dz_k} r_{kj}}{r_{ij}^2 r_{kj}^3} + \frac{a_{ijk} \frac{d}{dz_k} a_{ijk}}{r_{ij}^2 r_{kj}^2}\right)}{r_{ij} r_{kj}^2 \left(-\frac{a_{ijk}^2}{r_{ij}^2 r_{kj}^2} + 1\right)^{\frac{3}{2}}} \quad (166)$$

$$+ \frac{a_{ijk} \frac{d^2}{dz_k dx_k} r_{kj} - r_{kj} \frac{d^2}{dz_k dx_k} a_{ijk} - \frac{d}{dx_k} a_{ijk} \frac{d}{dz_k} r_{kj} + \frac{d}{dz_k} a_{ijk} \frac{d}{dx_k} r_{kj}}{r_{ij} r_{kj}^2 \sqrt{-\frac{a_{ijk}^2}{r_{ij}^2 r_{kj}^2} + 1}} - \frac{2 \left(a_{ijk} \frac{d}{dx_k} r_{kj} - r_{kj} \frac{d}{dx_k} a_{ijk}\right) \frac{d}{dz_k} r_{kj}}{r_{ij} r_{kj}^3 \sqrt{-\frac{a_{ijk}^2}{r_{ij}^2 r_{kj}^2} + 1}}$$

$$\frac{d^2}{dy_k^2} \alpha_{ijk} = \frac{\left(a_{ijk} \frac{d}{dy_k} r_{kj} - r_{kj} \frac{d}{dy_k} a_{ijk}\right) \left(-\frac{a_{ijk}^2 \frac{d}{dy_k} r_{kj}}{r_{ij}^2 r_{kj}^3} + \frac{a_{ijk} \frac{d}{dy_k} a_{ijk}}{r_{ij}^2 r_{kj}^2}\right)}{r_{ij} r_{kj}^2 \left(-\frac{a_{ijk}^2}{r_{ij}^2 r_{kj}^2} + 1\right)^{\frac{3}{2}}} + \frac{a_{ijk} \frac{d^2}{dy_k^2} r_{kj} - r_{kj} \frac{d^2}{dy_k^2} a_{ijk}}{r_{ij} r_{kj}^2 \sqrt{-\frac{a_{ijk}^2}{r_{ij}^2 r_{kj}^2} + 1}} - \frac{2 \left(a_{ijk} \frac{d}{dy_k} r_{kj} - r_{kj} \frac{d}{dy_k} a_{ijk}\right) \frac{d}{dy_k} r_{kj}}{r_{ij} r_{kj}^3 \sqrt{-\frac{a_{ijk}^2}{r_{ij}^2 r_{kj}^2} + 1}} \quad (167)$$

$$\frac{d^2}{dz_k dy_k} \alpha_{ijk} = \frac{\left( a_{ijk} \frac{d}{dy_k} r_{kj} - r_{kj} \frac{d}{dy_k} a_{ijk} \right) \left( -\frac{a_{ijk}^2 \frac{d}{dz_k} r_{kj}}{r_{ij}^2 r_{kj}^3} + \frac{a_{ijk} \frac{d}{dz_k} a_{ijk}}{r_{ij}^2 r_{kj}^2} \right)}{r_{ij} r_{kj}^2 \left( -\frac{a_{ijk}^2}{r_{ij}^2 r_{kj}^2} + 1 \right)^{\frac{3}{2}}} \quad (168)$$

$$+ \frac{a_{ijk} \frac{d^2}{dz_k dy_k} r_{kj} - r_{kj} \frac{d^2}{dz_k dy_k} a_{ijk} - \frac{d}{dy_k} a_{ijk} \frac{d}{dz_k} r_{kj} + \frac{d}{dz_k} a_{ijk} \frac{d}{dy_k} r_{kj}}{r_{ij} r_{kj}^2 \sqrt{-\frac{a_{ijk}^2}{r_{ij}^2 r_{kj}^2} + 1}} - \frac{2 \left( a_{ijk} \frac{d}{dy_k} r_{kj} - r_{kj} \frac{d}{dy_k} a_{ijk} \right) \frac{d}{dz_k} r_{kj}}{r_{ij} r_{kj}^3 \sqrt{-\frac{a_{ijk}^2}{r_{ij}^2 r_{kj}^2} + 1}}$$

$$\frac{d^2}{dz_k^2} \alpha_{ijk} = \frac{\left( a_{ijk} \frac{d}{dz_k} r_{kj} - r_{kj} \frac{d}{dz_k} a_{ijk} \right) \left( -\frac{a_{ijk}^2 \frac{d}{dz_k} r_{kj}}{r_{ij}^2 r_{kj}^3} + \frac{a_{ijk} \frac{d}{dz_k} a_{ijk}}{r_{ij}^2 r_{kj}^2} \right)}{r_{ij} r_{kj}^2 \left( -\frac{a_{ijk}^2}{r_{ij}^2 r_{kj}^2} + 1 \right)^{\frac{3}{2}}} + \frac{a_{ijk} \frac{d^2}{dz_k^2} r_{kj} - r_{kj} \frac{d^2}{dz_k^2} a_{ijk}}{r_{ij} r_{kj}^2 \sqrt{-\frac{a_{ijk}^2}{r_{ij}^2 r_{kj}^2} + 1}} - \frac{2 \left( a_{ijk} \frac{d}{dz_k} r_{kj} - r_{kj} \frac{d}{dz_k} a_{ijk} \right) \frac{d}{dz_k} r_{kj}}{r_{ij} r_{kj}^3 \sqrt{-\frac{a_{ijk}^2}{r_{ij}^2 r_{kj}^2} + 1}} \quad (169)$$

The derivatives of  $a_{ijk}$  with respect to the coordinates  $x$ ,  $y$  and  $z$  of the participating atoms  $i$ ,  $j$  and  $k$  are defined in Section S1.2.3. The derivatives of  $r_{ij}$  and  $r_{kj}$  with respect to the coordinates  $x$ ,  $y$  and  $z$  of the participating atoms  $i$ ,  $j$  and  $k$  are defined in Section S1.1.2. The derivatives of  $r_{ij}$  and  $r_{kj}$  are identical, only differing the atomic indices  $i$  and  $k$ .

### S1.2.3 Derivatives of $a_{ijk}$

The first and second order derivatives of  $a_{ijk}$  with respect to the coordinates  $x$ ,  $y$  and  $z$  of the participating atoms  $i$ ,  $j$  and  $k$  are:

$$\frac{d}{dx_i} a_{ijk} = x_{kj} \quad (170)$$

$$\frac{d}{dy_i} a_{ijk} = y_{kj} \quad (171)$$

$$\frac{d}{dz_i} a_{ijk} = z_{kj} \quad (172)$$

$$\frac{d}{dx_j} a_{ijk} = -x_i + 2x_j - x_k \quad (173)$$

$$\frac{d}{dy_j} a_{ijk} = -y_i + 2y_j - y_k \quad (174)$$

$$\frac{d}{dz_j} a_{ijk} = -z_i + 2z_j - z_k \quad (175)$$

$$\frac{d}{dx_k} a_{ijk} = -x_{ji} \quad (176)$$

$$\frac{d}{dy_k} a_{ijk} = -y_{ji} \quad (177)$$

$$\frac{d}{dz_k} a_{ijk} = -z_{ji} \quad (178)$$

$$\frac{d^2}{dx_i^2} a_{ijk} = 0 \quad (179)$$

$$\frac{d^2}{dy_i dx_i} a_{ijk} = 0 \quad (180)$$

$$\frac{d^2}{dz_i dx_i} a_{ijk} = 0 \quad (181)$$

$$\frac{d^2}{dx_j dx_i} a_{ijk} = -1 \quad (182)$$

$$\frac{d^2}{dy_j dx_i} a_{ijk} = 0 \quad (183)$$

$$\frac{d^2}{dz_j dx_i} a_{ijk} = 0 \quad (184)$$

$$\frac{d^2}{dx_k dx_i} a_{ijk} = 1 \quad (185)$$

$$\frac{d^2}{dy_k dx_i} a_{ijk} = 0 \quad (186)$$

$$\frac{d^2}{dz_k dx_i} a_{ijk} = 0 \quad (187)$$

$$\frac{d^2}{dy_i^2} a_{ijk} = 0 \quad (188)$$

$$\frac{d^2}{dz_i dy_i} a_{ijk} = 0 \quad (189)$$

$$\frac{d^2}{dx_j dy_i} a_{ijk} = 0 \quad (190)$$

$$\frac{d^2}{dy_j dy_i} a_{ijk} = -1 \quad (191)$$

$$\frac{d^2}{dz_j dy_i} a_{ijk} = 0 \quad (192)$$

$$\frac{d^2}{dx_k dy_i} a_{ijk} = 0 \quad (193)$$

$$\frac{d^2}{dy_k dy_i} a_{ijk} = 1 \quad (194)$$

$$\frac{d^2}{dz_k dy_i} a_{ijk} = 0 \quad (195)$$

$$\frac{d^2}{dz_i^2} a_{ijk} = 0 \quad (196)$$

$$\frac{d^2}{dx_j dz_i} a_{ijk} = 0 \quad (197)$$

$$\frac{d^2}{dy_j dz_i} a_{ijk} = 0 \quad (198)$$

$$\frac{d^2}{dz_j dz_i} a_{ijk} = -1 \quad (199)$$

$$\frac{d^2}{dx_k dz_i} a_{ijk} = 0 \quad (200)$$

$$\frac{d^2}{dy_k dz_i} a_{ijk} = 0 \quad (201)$$

$$\frac{d^2}{dz_k dz_i} a_{ijk} = 1 \quad (202)$$

$$\frac{d^2}{dx_j^2} a_{ijk} = 2 \quad (203)$$

$$\frac{d^2}{dy_j dx_j} a_{ijk} = 0 \quad (204)$$

$$\frac{d^2}{dz_j dx_j} a_{ijk} = 0 \quad (205)$$

$$\frac{d^2}{dx_k dx_j} a_{ijk} = -1 \quad (206)$$

$$\frac{d^2}{dy_k dx_j} a_{ijk} = 0 \quad (207)$$

$$\frac{d^2}{dz_k dx_j} a_{ijk} = 0 \quad (208)$$

$$\frac{d^2}{dy_j^2} a_{ijk} = 2 \quad (209)$$

$$\frac{d^2}{dz_j dy_j} a_{ijk} = 0 \quad (210)$$

$$\frac{d^2}{dx_k dy_j} a_{ijk} = 0 \quad (211)$$

$$\frac{d^2}{dy_k dy_j} a_{ijk} = -1 \quad (212)$$

$$\frac{d^2}{dz_k dy_j} a_{ijk} = 0 \quad (213)$$

$$\frac{d^2}{dz_j^2} a_{ijk} = 2 \quad (214)$$

$$\frac{d^2}{dx_k dz_j} a_{ijk} = 0 \quad (215)$$

$$\frac{d^2}{dy_k dz_j} a_{ijk} = 0 \quad (216)$$

$$\frac{d^2}{dz_k dz_j} a_{ijk} = -1 \quad (217)$$

$$\frac{d^2}{dx_k^2} a_{ijk} = 0 \quad (218)$$

$$\frac{d^2}{dy_k dx_k} a_{ijk} = 0 \quad (219)$$

$$\frac{d^2}{dz_k dx_k} a_{ijk} = 0 \quad (220)$$

$$\frac{d^2}{dy_k^2} a_{ijk} = 0 \quad (221)$$

$$\frac{d^2}{dz_k dy_k} a_{ijk} = 0 \quad (222)$$

$$\frac{d^2}{dz_k^2} a_{ijk} = 0 \quad (223)$$



### S1.3 Dihedral Potential

The dihedral harmonic potential between three atoms  $i, j, k$  and  $l$  is given by

$$E_{\text{dihedral},ijkl} = \sum k_{\text{dihedral}} \left( (\sin \theta_{ijkl}^0 - \sin \theta_{ijkl})^2 + (\cos \theta_{ijkl}^0 - \cos \theta_{ijkl})^2 \right) + \sum \frac{Q}{r_{ij}}$$

The cosine of the dihedral angle between four atoms  $i, j, k$  and  $l$  is given by

$$\cos \theta_{ijkl} = \frac{(x_{ji}y_{kj} - x_{kj}y_{ji})(x_{kj}y_{lk} - x_{lk}y_{kj}) + (x_{ji}z_{kj} - x_{kj}z_{ji})(x_{kj}z_{lk} - x_{lk}z_{kj}) + (y_{ji}z_{kj} - y_{kj}z_{ji})(y_{kj}z_{lk} - y_{lk}z_{kj})}{\sqrt{(x_{ji}y_{kj} - x_{kj}y_{ji})^2 + (x_{ji}z_{kj} - x_{kj}z_{ji})^2 + (y_{ji}z_{kj} - y_{kj}z_{ji})^2} \sqrt{(x_{kj}y_{lk} - x_{lk}y_{kj})^2 + (x_{kj}z_{lk} - x_{lk}z_{kj})^2 + (y_{kj}z_{lk} - y_{lk}z_{kj})^2}} \quad (224)$$

$$= \frac{a_{ijkl}}{b_{ijk}b_{jkl}}, \quad (225)$$

where  $a_{ijkl}$  is the dot product of the cross product of  $\mathbf{r}_{ji}$  and  $\mathbf{r}_{kj}$  and the cross product of  $\mathbf{r}_{kj}$  and  $\mathbf{r}_{lk}$ .  $b_{ijk}$  is the norm of the first cross product and  $b_{jkl}$  is the norm of the second cross product. The sine of the dihedral angle between four atoms  $i, j, k$  and  $l$  is given by

$$\sin \theta_{ijkl} = \frac{\sqrt{x_{kj}^2 + y_{kj}^2 + z_{kj}^2} (x_{ji}(y_{kj}z_{lk} - y_{lk}z_{kj}) - y_{ji}(x_{kj}z_{lk} - x_{lk}z_{kj}) + z_{ji}(x_{kj}y_{lk} - x_{lk}y_{kj}))}{\sqrt{(x_{ji}y_{kj} - x_{kj}y_{ji})^2 + (x_{ji}z_{kj} - x_{kj}z_{ji})^2 + (y_{ji}z_{kj} - y_{kj}z_{ji})^2} \sqrt{(x_{kj}y_{lk} - x_{lk}y_{kj})^2 + (x_{kj}z_{lk} - x_{lk}z_{kj})^2 + (y_{kj}z_{lk} - y_{lk}z_{kj})^2}} \quad (226)$$

$$= \frac{d_{ijkl}}{b_{ijk}b_{jkl}}, \quad (227)$$

where  $d_{ijkl}$  is the dot product of  $\mathbf{r}_{ji}$  and the cross product of  $\mathbf{r}_{kj}$  and  $\mathbf{r}_{lk}$  multiplied by the norm of  $\mathbf{r}_{kj}$ .

#### S1.3.1 Derivatives of $E_{\text{dihedral},ijkl}$

The first and second order derivatives of  $E_{\text{angle},ijk}$  with respect to the coordinates  $x, y$  and  $z$  of the participating atoms  $i, j$  and  $k$  are:

$$\frac{d}{dx_i} E_{\text{dihedral},ijkl} = 2k_{\text{dihedral}} \left( -(-\cos \theta_{ijkl} + \cos \theta_{ijk}^0) \frac{d}{dx_i} \cos \theta_{ijkl} - (-\sin \theta_{ijkl} + \sin \theta_{ijk}^0) \frac{d}{dx_i} \sin \theta_{ijkl} \right) \quad (228)$$

$$\frac{d}{dy_i} E_{\text{dihedral},ijkl} = 2k_{\text{dihedral}} \left( -(-\cos \theta_{ijkl} + \cos \theta_{ijk}^0) \frac{d}{dy_i} \cos \theta_{ijkl} - (-\sin \theta_{ijkl} + \sin \theta_{ijk}^0) \frac{d}{dy_i} \sin \theta_{ijkl} \right) \quad (229)$$

$$\frac{d}{dz_i} E_{\text{dihedral},ijkl} = 2k_{\text{dihedral}} \left( -(-\cos \theta_{ijkl} + \cos \theta_{ijk}^0) \frac{d}{dz_i} \cos \theta_{ijkl} - (-\sin \theta_{ijkl} + \sin \theta_{ijk}^0) \frac{d}{dz_i} \sin \theta_{ijkl} \right) \quad (230)$$

$$\frac{d}{dx_j} E_{\text{dihedral},ijkl} = 2k_{\text{dihedral}} \left( -(-\cos \theta_{ijkl} + \cos \theta_{ijk}^0) \frac{d}{dx_j} \cos \theta_{ijkl} - (-\sin \theta_{ijkl} + \sin \theta_{ijk}^0) \frac{d}{dx_j} \sin \theta_{ijkl} \right) \quad (231)$$

$$\frac{d}{dy_j} E_{\text{dihedral},ijkl} = 2k_{\text{dihedral}} \left( -(-\cos \theta_{ijkl} + \cos \theta_{ijk}^0) \frac{d}{dy_j} \cos \theta_{ijkl} - (-\sin \theta_{ijkl} + \sin \theta_{ijk}^0) \frac{d}{dy_j} \sin \theta_{ijkl} \right) \quad (232)$$

$$\frac{d}{dz_j} E_{\text{dihedral},ijkl} = 2k_{\text{dihedral}} \left( -(-\cos \theta_{ijkl} + \cos \theta_{ijk}^0) \frac{d}{dz_j} \cos \theta_{ijkl} - (-\sin \theta_{ijkl} + \sin \theta_{ijk}^0) \frac{d}{dz_j} \sin \theta_{ijkl} \right) \quad (233)$$

$$\frac{d}{dx_k} E_{\text{dihedral},ijkl} = 2k_{\text{dihedral}} \left( -(-\cos \theta_{ijkl} + \cos \theta_{ijk}^0) \frac{d}{dx_k} \cos \theta_{ijkl} - (-\sin \theta_{ijkl} + \sin \theta_{ijk}^0) \frac{d}{dx_k} \sin \theta_{ijkl} \right) \quad (234)$$

$$\frac{d}{dy_k} E_{\text{dihedral},ijkl} = 2k_{\text{dihedral}} \left( -(-\cos \theta_{ijkl} + \cos \theta_{ijk}^0) \frac{d}{dy_k} \cos \theta_{ijkl} - (-\sin \theta_{ijkl} + \sin \theta_{ijk}^0) \frac{d}{dy_k} \sin \theta_{ijkl} \right) \quad (235)$$

$$\frac{d}{dz_k} E_{\text{dihedral},ijkl} = 2k_{\text{dihedral}} \left( -(-\cos \theta_{ijkl} + \cos \theta_{ijk}^0) \frac{d}{dz_k} \cos \theta_{ijkl} - (-\sin \theta_{ijkl} + \sin \theta_{ijk}^0) \frac{d}{dz_k} \sin \theta_{ijkl} \right) \quad (236)$$

$$\frac{d}{dx_l} E_{\text{dihedral},ijkl} = 2k_{\text{dihedral}} \left( -(-\cos \theta_{ijkl} + \cos \theta_{ijk}^0) \frac{d}{dx_l} \cos \theta_{ijkl} - (-\sin \theta_{ijkl} + \sin \theta_{ijk}^0) \frac{d}{dx_l} \sin \theta_{ijkl} \right) \quad (237)$$

$$\frac{d}{dy_l} E_{\text{dihedral},ijkl} = 2k_{\text{dihedral}} \left( -(-\cos \theta_{ijkl} + \cos \theta_{ijk}^0) \frac{d}{dy_l} \cos \theta_{ijkl} - (-\sin \theta_{ijkl} + \sin \theta_{ijk}^0) \frac{d}{dy_l} \sin \theta_{ijkl} \right) \quad (238)$$

$$\frac{d}{dz_l} E_{\text{dihedral},ijkl} = 2k_{\text{dihedral}} \left( -(-\cos \theta_{ijkl} + \cos \theta_{ijk}^0) \frac{d}{dz_l} \cos \theta_{ijkl} - (-\sin \theta_{ijkl} + \sin \theta_{ijk}^0) \frac{d}{dz_l} \sin \theta_{ijkl} \right) \quad (239)$$

$$\frac{d^2}{dx_i^2} E_{\text{dihedral},ijkl} = 2k_{\text{dihedral}} \left( -(-\cos \theta_{ijkl} + \cos \theta_{ijk}^0) \frac{d^2}{dx_i^2} \cos \theta_{ijkl} - (-\sin \theta_{ijkl} + \sin \theta_{ijk}^0) \frac{d^2}{dx_i^2} \sin \theta_{ijkl} + \left( \frac{d}{dx_i} \cos \theta_{ijkl} \right)^2 + \left( \frac{d}{dx_i} \sin \theta_{ijkl} \right)^2 \right) \quad (240)$$

$$\begin{aligned} \frac{d^2}{dy_i dx_i} E_{\text{dihedral},ijkl} &= 2k_{\text{dihedral}} \left( -(-\cos \theta_{ijkl} + \cos \theta_{ijk}^0) \frac{d^2}{dy_i dx_i} \cos \theta_{ijkl} - (-\sin \theta_{ijkl} + \sin \theta_{ijk}^0) \frac{d^2}{dy_i dx_i} \sin \theta_{ijkl} \right. \\ &\quad \left. + \frac{d}{dx_i} \cos \theta_{ijkl} \frac{d}{dy_i} \cos \theta_{ijkl} + \frac{d}{dx_i} \sin \theta_{ijkl} \frac{d}{dy_i} \sin \theta_{ijkl} \right) \end{aligned} \quad (241)$$

$$\begin{aligned} \frac{d^2}{dz_i dx_i} E_{\text{dihedral},ijkl} &= 2k_{\text{dihedral}} \left( -(-\cos \theta_{ijkl} + \cos \theta_{ijk}^0) \frac{d^2}{dz_i dx_i} \cos \theta_{ijkl} - (-\sin \theta_{ijkl} + \sin \theta_{ijk}^0) \frac{d^2}{dz_i dx_i} \sin \theta_{ijkl} \right. \\ &\quad \left. + \frac{d}{dx_i} \cos \theta_{ijkl} \frac{d}{dz_i} \cos \theta_{ijkl} + \frac{d}{dx_i} \sin \theta_{ijkl} \frac{d}{dz_i} \sin \theta_{ijkl} \right) \end{aligned} \quad (242)$$

$$\begin{aligned} \frac{d^2}{dx_j dx_i} E_{\text{dihedral},ijkl} &= 2k_{\text{dihedral}} \left( -(-\cos \theta_{ijkl} + \cos \theta_{ijk}^0) \frac{d^2}{dx_j dx_i} \cos \theta_{ijkl} - (-\sin \theta_{ijkl} + \sin \theta_{ijk}^0) \frac{d^2}{dx_j dx_i} \sin \theta_{ijkl} \right. \\ &\quad \left. + \frac{d}{dx_i} \cos \theta_{ijkl} \frac{d}{dx_j} \cos \theta_{ijkl} + \frac{d}{dx_i} \sin \theta_{ijkl} \frac{d}{dx_j} \sin \theta_{ijkl} \right) \end{aligned} \quad (243)$$

$$\begin{aligned} \frac{d^2}{dy_j dx_i} E_{\text{dihedral},ijkl} &= 2k_{\text{dihedral}} \left( -(-\cos \theta_{ijkl} + \cos \theta_{ijk}^0) \frac{d^2}{dy_j dx_i} \cos \theta_{ijkl} - (-\sin \theta_{ijkl} + \sin \theta_{ijk}^0) \frac{d^2}{dy_j dx_i} \sin \theta_{ijkl} \right. \\ &\quad \left. + \frac{d}{dx_i} \cos \theta_{ijkl} \frac{d}{dy_j} \cos \theta_{ijkl} + \frac{d}{dx_i} \sin \theta_{ijkl} \frac{d}{dy_j} \sin \theta_{ijkl} \right) \end{aligned} \quad (244)$$

$$\begin{aligned} \frac{d^2}{dz_j dx_i} E_{\text{dihedral},ijkl} &= 2k_{\text{dihedral}} \left( -(-\cos \theta_{ijkl} + \cos \theta_{ijk}^0) \frac{d^2}{dz_j dx_i} \cos \theta_{ijkl} - (-\sin \theta_{ijkl} + \sin \theta_{ijk}^0) \frac{d^2}{dz_j dx_i} \sin \theta_{ijkl} \right. \\ &\quad \left. + \frac{d}{dx_i} \cos \theta_{ijkl} \frac{d}{dz_j} \cos \theta_{ijkl} + \frac{d}{dx_i} \sin \theta_{ijkl} \frac{d}{dz_j} \sin \theta_{ijkl} \right) \end{aligned} \quad (245)$$

$$\begin{aligned} \frac{d^2}{dx_k dx_i} E_{\text{dihedral},ijkl} &= 2k_{\text{dihedral}} \left( -(-\cos \theta_{ijkl} + \cos \theta_{ijk}^0) \frac{d^2}{dx_k dx_i} \cos \theta_{ijkl} - (-\sin \theta_{ijkl} + \sin \theta_{ijk}^0) \frac{d^2}{dx_k dx_i} \sin \theta_{ijkl} \right. \\ &\quad \left. + \frac{d}{dx_i} \cos \theta_{ijkl} \frac{d}{dx_k} \cos \theta_{ijkl} + \frac{d}{dx_i} \sin \theta_{ijkl} \frac{d}{dx_k} \sin \theta_{ijkl} \right) \end{aligned} \quad (246)$$

$$\begin{aligned} \frac{d^2}{dy_k dx_i} E_{\text{dihedral},ijkl} &= 2k_{\text{dihedral}} \left( -(-\cos \theta_{ijkl} + \cos \theta_{ijk}^0) \frac{d^2}{dy_k dx_i} \cos \theta_{ijkl} - (-\sin \theta_{ijkl} + \sin \theta_{ijk}^0) \frac{d^2}{dy_k dx_i} \sin \theta_{ijkl} \right. \\ &\quad \left. + \frac{d}{dx_i} \cos \theta_{ijkl} \frac{d}{dy_k} \cos \theta_{ijkl} + \frac{d}{dx_i} \sin \theta_{ijkl} \frac{d}{dy_k} \sin \theta_{ijkl} \right) \end{aligned} \quad (247)$$

$$\begin{aligned} \frac{d^2}{dz_k dx_i} E_{\text{dihedral},ijkl} &= 2k_{\text{dihedral}} \left( -(-\cos \theta_{ijkl} + \cos \theta_{ijk}^0) \frac{d^2}{dz_k dx_i} \cos \theta_{ijkl} - (-\sin \theta_{ijkl} + \sin \theta_{ijk}^0) \frac{d^2}{dz_k dx_i} \sin \theta_{ijkl} \right. \\ &\quad \left. + \frac{d}{dx_i} \cos \theta_{ijkl} \frac{d}{dz_k} \cos \theta_{ijkl} + \frac{d}{dx_i} \sin \theta_{ijkl} \frac{d}{dz_k} \sin \theta_{ijkl} \right) \end{aligned} \quad (248)$$

$$\begin{aligned} \frac{d^2}{dx_l dx_i} E_{\text{dihedral},ijkl} &= 2k_{\text{dihedral}} \left( -(-\cos \theta_{ijkl} + \cos \theta_{ijk}^0) \frac{d^2}{dx_l dx_i} \cos \theta_{ijkl} - (-\sin \theta_{ijkl} + \sin \theta_{ijk}^0) \frac{d^2}{dx_l dx_i} \sin \theta_{ijkl} \right. \\ &\quad \left. + \frac{d}{dx_i} \cos \theta_{ijkl} \frac{d}{dx_l} \cos \theta_{ijkl} + \frac{d}{dx_i} \sin \theta_{ijkl} \frac{d}{dx_l} \sin \theta_{ijkl} \right) \end{aligned} \quad (249)$$

$$\begin{aligned} \frac{d^2}{dy_l dx_i} E_{\text{dihedral},ijkl} &= 2k_{\text{dihedral}} \left( -(-\cos \theta_{ijkl} + \cos \theta_{ijk}^0) \frac{d^2}{dy_l dx_i} \cos \theta_{ijkl} - (-\sin \theta_{ijkl} + \sin \theta_{ijk}^0) \frac{d^2}{dy_l dx_i} \sin \theta_{ijkl} \right. \\ &\quad \left. + \frac{d}{dx_i} \cos \theta_{ijkl} \frac{d}{dy_l} \cos \theta_{ijkl} + \frac{d}{dx_i} \sin \theta_{ijkl} \frac{d}{dy_l} \sin \theta_{ijkl} \right) \end{aligned} \quad (250)$$

$$\begin{aligned} \frac{d^2}{dz_l dx_i} E_{\text{dihedral},ijkl} &= 2k_{\text{dihedral}} \left( -(-\cos \theta_{ijkl} + \cos \theta_{ijk}^0) \frac{d^2}{dz_l dx_i} \cos \theta_{ijkl} - (-\sin \theta_{ijkl} + \sin \theta_{ijk}^0) \frac{d^2}{dz_l dx_i} \sin \theta_{ijkl} \right. \\ &\quad \left. + \frac{d}{dx_i} \cos \theta_{ijkl} \frac{d}{dz_l} \cos \theta_{ijkl} + \frac{d}{dx_i} \sin \theta_{ijkl} \frac{d}{dz_l} \sin \theta_{ijkl} \right) \end{aligned} \quad (251)$$

$$\begin{aligned} \frac{d^2}{dy_i^2} E_{\text{dihedral},ijkl} &= 2k_{\text{dihedral}} \left( -(-\cos \theta_{ijkl} + \cos \theta_{ijk}^0) \frac{d^2}{dy_i^2} \cos \theta_{ijkl} - (-\sin \theta_{ijkl} + \sin \theta_{ijk}^0) \frac{d^2}{dy_i^2} \sin \theta_{ijkl} \right. \\ &\quad \left. + \left( \frac{d}{dy_i} \cos \theta_{ijkl} \right)^2 + \left( \frac{d}{dy_i} \sin \theta_{ijkl} \right)^2 \right) \end{aligned} \quad (252)$$

$$\begin{aligned} \frac{d^2}{dz_i dy_i} E_{\text{dihedral},ijkl} &= 2k_{\text{dihedral}} \left( -(-\cos \theta_{ijkl} + \cos \theta_{ijk}^0) \frac{d^2}{dz_i dy_i} \cos \theta_{ijkl} - (-\sin \theta_{ijkl} + \sin \theta_{ijk}^0) \frac{d^2}{dz_i dy_i} \sin \theta_{ijkl} \right. \\ &\quad \left. + \frac{d}{dy_i} \cos \theta_{ijkl} \frac{d}{dz_i} \cos \theta_{ijkl} + \frac{d}{dy_i} \sin \theta_{ijkl} \frac{d}{dz_i} \sin \theta_{ijkl} \right) \end{aligned} \quad (253)$$

$$\begin{aligned} \frac{d^2}{dx_j dy_i} E_{\text{dihedral},ijkl} &= 2k_{\text{dihedral}} \left( -(-\cos \theta_{ijkl} + \cos \theta_{ijk}^0) \frac{d^2}{dy_i dx_j} \cos \theta_{ijkl} - (-\sin \theta_{ijkl} + \sin \theta_{ijk}^0) \frac{d^2}{dy_i dx_j} \sin \theta_{ijkl} \right. \\ &\quad \left. + \frac{d}{dx_j} \cos \theta_{ijkl} \frac{d}{dy_i} \cos \theta_{ijkl} + \frac{d}{dx_j} \sin \theta_{ijkl} \frac{d}{dy_i} \sin \theta_{ijkl} \right) \end{aligned} \quad (254)$$

$$\begin{aligned} \frac{d^2}{dy_j dy_i} E_{\text{dihedral},ijkl} &= 2k_{\text{dihedral}} \left( -(-\cos \theta_{ijkl} + \cos \theta_{ijk}^0) \frac{d^2}{dy_j dy_i} \cos \theta_{ijkl} - (-\sin \theta_{ijkl} + \sin \theta_{ijk}^0) \frac{d^2}{dy_j dy_i} \sin \theta_{ijkl} \right. \\ &\quad \left. + \frac{d}{dy_i} \cos \theta_{ijkl} \frac{d}{dy_j} \cos \theta_{ijkl} + \frac{d}{dy_i} \sin \theta_{ijkl} \frac{d}{dy_j} \sin \theta_{ijkl} \right) \end{aligned} \quad (255)$$

$$\begin{aligned} \frac{d^2}{dz_j dy_i} E_{\text{dihedral},ijkl} &= 2k_{\text{dihedral}} \left( -(-\cos \theta_{ijkl} + \cos \theta_{ijk}^0) \frac{d^2}{dz_j dy_i} \cos \theta_{ijkl} - (-\sin \theta_{ijkl} + \sin \theta_{ijk}^0) \frac{d^2}{dz_j dy_i} \sin \theta_{ijkl} \right. \\ &\quad \left. + \frac{d}{dy_i} \cos \theta_{ijkl} \frac{d}{dz_j} \cos \theta_{ijkl} + \frac{d}{dy_i} \sin \theta_{ijkl} \frac{d}{dz_j} \sin \theta_{ijkl} \right) \end{aligned} \quad (256)$$

$$\begin{aligned} \frac{d^2}{dx_k dy_i} E_{\text{dihedral},ijkl} &= 2k_{\text{dihedral}} \left( -(-\cos \theta_{ijkl} + \cos \theta_{ijk}^0) \frac{d^2}{dy_i dx_k} \cos \theta_{ijkl} - (-\sin \theta_{ijkl} + \sin \theta_{ijk}^0) \frac{d^2}{dy_i dx_k} \sin \theta_{ijkl} \right. \\ &\quad \left. + \frac{d}{dx_k} \cos \theta_{ijkl} \frac{d}{dy_i} \cos \theta_{ijkl} + \frac{d}{dx_k} \sin \theta_{ijkl} \frac{d}{dy_i} \sin \theta_{ijkl} \right) \end{aligned} \quad (257)$$

$$\begin{aligned} \frac{d^2}{dy_k dy_i} E_{\text{dihedral},ijkl} &= 2k_{\text{dihedral}} \left( -(-\cos \theta_{ijkl} + \cos \theta_{ijk}^0) \frac{d^2}{dy_k dy_i} \cos \theta_{ijkl} - (-\sin \theta_{ijkl} + \sin \theta_{ijk}^0) \frac{d^2}{dy_k dy_i} \sin \theta_{ijkl} \right. \\ &\quad \left. + \frac{d}{dy_i} \cos \theta_{ijkl} \frac{d}{dy_k} \cos \theta_{ijkl} + \frac{d}{dy_i} \sin \theta_{ijkl} \frac{d}{dy_k} \sin \theta_{ijkl} \right) \end{aligned} \quad (258)$$

$$\begin{aligned} \frac{d^2}{dz_k dy_i} E_{\text{dihedral},ijkl} &= 2k_{\text{dihedral}} \left( -(-\cos \theta_{ijkl} + \cos \theta_{ijk}^0) \frac{d^2}{dz_k dy_i} \cos \theta_{ijkl} - (-\sin \theta_{ijkl} + \sin \theta_{ijk}^0) \frac{d^2}{dz_k dy_i} \sin \theta_{ijkl} \right. \\ &\quad \left. + \frac{d}{dy_i} \cos \theta_{ijkl} \frac{d}{dz_k} \cos \theta_{ijkl} + \frac{d}{dy_i} \sin \theta_{ijkl} \frac{d}{dz_k} \sin \theta_{ijkl} \right) \end{aligned} \quad (259)$$

$$\begin{aligned} \frac{d^2}{dx_l dy_i} E_{\text{dihedral},ijkl} &= 2k_{\text{dihedral}} \left( -(-\cos \theta_{ijkl} + \cos \theta_{ijk}^0) \frac{d^2}{dy_i dx_l} \cos \theta_{ijkl} - (-\sin \theta_{ijkl} + \sin \theta_{ijk}^0) \frac{d^2}{dy_i dx_l} \sin \theta_{ijkl} \right. \\ &\quad \left. + \frac{d}{dx_l} \cos \theta_{ijkl} \frac{d}{dy_i} \cos \theta_{ijkl} + \frac{d}{dx_l} \sin \theta_{ijkl} \frac{d}{dy_i} \sin \theta_{ijkl} \right) \end{aligned} \quad (260)$$

$$\begin{aligned} \frac{d^2}{dy_l dy_i} E_{\text{dihedral},ijkl} &= 2k_{\text{dihedral}} \left( -(-\cos \theta_{ijkl} + \cos \theta_{ijk}^0) \frac{d^2}{dy_l dy_i} \cos \theta_{ijkl} - (-\sin \theta_{ijkl} + \sin \theta_{ijk}^0) \frac{d^2}{dy_l dy_i} \sin \theta_{ijkl} \right. \\ &\quad \left. + \frac{d}{dy_i} \cos \theta_{ijkl} \frac{d}{dy_l} \cos \theta_{ijkl} + \frac{d}{dy_i} \sin \theta_{ijkl} \frac{d}{dy_l} \sin \theta_{ijkl} \right) \end{aligned} \quad (261)$$

$$\begin{aligned} \frac{d^2}{dz_l dy_i} E_{\text{dihedral},ijkl} &= 2k_{\text{dihedral}} \left( -(-\cos \theta_{ijkl} + \cos \theta_{ijk}^0) \frac{d^2}{dz_l dy_i} \cos \theta_{ijkl} - (-\sin \theta_{ijkl} + \sin \theta_{ijk}^0) \frac{d^2}{dz_l dy_i} \sin \theta_{ijkl} \right. \\ &\quad \left. + \frac{d}{dy_i} \cos \theta_{ijkl} \frac{d}{dz_l} \cos \theta_{ijkl} + \frac{d}{dy_i} \sin \theta_{ijkl} \frac{d}{dz_l} \sin \theta_{ijkl} \right) \end{aligned} \quad (262)$$

$$\begin{aligned} \frac{d^2}{dz_i^2} E_{\text{dihedral},ijkl} &= 2k_{\text{dihedral}} \left( -(-\cos \theta_{ijkl} + \cos \theta_{ijk}^0) \frac{d^2}{dz_i^2} \cos \theta_{ijkl} - (-\sin \theta_{ijkl} + \sin \theta_{ijk}^0) \frac{d^2}{dz_i^2} \sin \theta_{ijkl} \right. \\ &\quad \left. + \left( \frac{d}{dz_i} \cos \theta_{ijkl} \right)^2 + \left( \frac{d}{dz_i} \sin \theta_{ijkl} \right)^2 \right) \end{aligned} \quad (263)$$

$$\begin{aligned} \frac{d^2}{dx_j dz_i} E_{\text{dihedral},ijkl} &= 2k_{\text{dihedral}} \left( -(-\cos \theta_{ijkl} + \cos \theta_{ijk}^0) \frac{d^2}{dz_i dx_j} \cos \theta_{ijkl} - (-\sin \theta_{ijkl} + \sin \theta_{ijk}^0) \frac{d^2}{dz_i dx_j} \sin \theta_{ijkl} \right. \\ &\quad \left. + \frac{d}{dx_j} \cos \theta_{ijkl} \frac{d}{dz_i} \cos \theta_{ijkl} + \frac{d}{dx_j} \sin \theta_{ijkl} \frac{d}{dz_i} \sin \theta_{ijkl} \right) \end{aligned} \quad (264)$$

$$\begin{aligned} \frac{d^2}{dy_j dz_i} E_{\text{dihedral},ijkl} &= 2k_{\text{dihedral}} \left( -(-\cos \theta_{ijkl} + \cos \theta_{ijk}^0) \frac{d^2}{dz_i dy_j} \cos \theta_{ijkl} - (-\sin \theta_{ijkl} + \sin \theta_{ijk}^0) \frac{d^2}{dz_i dy_j} \sin \theta_{ijkl} \right. \\ &\quad \left. + \frac{d}{dy_j} \cos \theta_{ijkl} \frac{d}{dz_i} \cos \theta_{ijkl} + \frac{d}{dy_j} \sin \theta_{ijkl} \frac{d}{dz_i} \sin \theta_{ijkl} \right) \end{aligned} \quad (265)$$

$$\begin{aligned} \frac{d^2}{dz_j dz_i} E_{\text{dihedral},ijkl} &= 2k_{\text{dihedral}} \left( -(-\cos \theta_{ijkl} + \cos \theta_{ijk}^0) \frac{d^2}{dz_j dz_i} \cos \theta_{ijkl} - (-\sin \theta_{ijkl} + \sin \theta_{ijk}^0) \frac{d^2}{dz_j dz_i} \sin \theta_{ijkl} \right. \\ &\quad \left. + \frac{d}{dz_i} \cos \theta_{ijkl} \frac{d}{dz_j} \cos \theta_{ijkl} + \frac{d}{dz_i} \sin \theta_{ijkl} \frac{d}{dz_j} \sin \theta_{ijkl} \right) \end{aligned} \quad (266)$$

$$\begin{aligned} \frac{d^2}{dx_k dz_i} E_{\text{dihedral},ijkl} &= 2k_{\text{dihedral}} \left( -(-\cos \theta_{ijkl} + \cos \theta_{ijk}^0) \frac{d^2}{dz_i dx_k} \cos \theta_{ijkl} - (-\sin \theta_{ijkl} + \sin \theta_{ijk}^0) \frac{d^2}{dz_i dx_k} \sin \theta_{ijkl} \right. \\ &\quad \left. + \frac{d}{dx_k} \cos \theta_{ijkl} \frac{d}{dz_i} \cos \theta_{ijkl} + \frac{d}{dx_k} \sin \theta_{ijkl} \frac{d}{dz_i} \sin \theta_{ijkl} \right) \end{aligned} \quad (267)$$

$$\begin{aligned} \frac{d^2}{dy_k dz_i} E_{\text{dihedral},ijkl} &= 2k_{\text{dihedral}} \left( -(-\cos \theta_{ijkl} + \cos \theta_{ijk}^0) \frac{d^2}{dz_i dy_k} \cos \theta_{ijkl} - (-\sin \theta_{ijkl} + \sin \theta_{ijk}^0) \frac{d^2}{dz_i dy_k} \sin \theta_{ijkl} \right. \\ &\quad \left. + \frac{d}{dy_k} \cos \theta_{ijkl} \frac{d}{dz_i} \cos \theta_{ijkl} + \frac{d}{dy_k} \sin \theta_{ijkl} \frac{d}{dz_i} \sin \theta_{ijkl} \right) \end{aligned} \quad (268)$$

$$\begin{aligned} \frac{d^2}{dz_k dz_i} E_{\text{dihedral},ijkl} &= 2k_{\text{dihedral}} \left( -(-\cos \theta_{ijkl} + \cos \theta_{ijk}^0) \frac{d^2}{dz_k dz_i} \cos \theta_{ijkl} - (-\sin \theta_{ijkl} + \sin \theta_{ijk}^0) \frac{d^2}{dz_k dz_i} \sin \theta_{ijkl} \right. \\ &\quad \left. + \frac{d}{dz_i} \cos \theta_{ijkl} \frac{d}{dz_k} \cos \theta_{ijkl} + \frac{d}{dz_i} \sin \theta_{ijkl} \frac{d}{dz_k} \sin \theta_{ijkl} \right) \end{aligned} \quad (269)$$

$$\begin{aligned} \frac{d^2}{dx_l dz_i} E_{\text{dihedral},ijkl} &= 2k_{\text{dihedral}} \left( -(-\cos \theta_{ijkl} + \cos \theta_{ijk}^0) \frac{d^2}{dz_i dx_l} \cos \theta_{ijkl} - (-\sin \theta_{ijkl} + \sin \theta_{ijk}^0) \frac{d^2}{dz_i dx_l} \sin \theta_{ijkl} \right. \\ &\quad \left. + \frac{d}{dx_l} \cos \theta_{ijkl} \frac{d}{dz_i} \cos \theta_{ijkl} + \frac{d}{dx_l} \sin \theta_{ijkl} \frac{d}{dz_i} \sin \theta_{ijkl} \right) \end{aligned} \quad (270)$$

$$\begin{aligned} \frac{d^2}{dy_l dz_i} E_{\text{dihedral},ijkl} &= 2k_{\text{dihedral}} \left( -(-\cos \theta_{ijkl} + \cos \theta_{ijk}^0) \frac{d^2}{dz_i dy_l} \cos \theta_{ijkl} - (-\sin \theta_{ijkl} + \sin \theta_{ijk}^0) \frac{d^2}{dz_i dy_l} \sin \theta_{ijkl} \right. \\ &\quad \left. + \frac{d}{dy_l} \cos \theta_{ijkl} \frac{d}{dz_i} \cos \theta_{ijkl} + \frac{d}{dy_l} \sin \theta_{ijkl} \frac{d}{dz_i} \sin \theta_{ijkl} \right) \end{aligned} \quad (271)$$

$$\begin{aligned} \frac{d^2}{dz_l dz_i} E_{\text{dihedral},ijkl} &= 2k_{\text{dihedral}} \left( -(-\cos \theta_{ijkl} + \cos \theta_{ijk}^0) \frac{d^2}{dz_l dz_i} \cos \theta_{ijkl} - (-\sin \theta_{ijkl} + \sin \theta_{ijk}^0) \frac{d^2}{dz_l dz_i} \sin \theta_{ijkl} \right. \\ &\quad \left. + \frac{d}{dz_i} \cos \theta_{ijkl} \frac{d}{dz_l} \cos \theta_{ijkl} + \frac{d}{dz_i} \sin \theta_{ijkl} \frac{d}{dz_l} \sin \theta_{ijkl} \right) \end{aligned} \quad (272)$$

$$\begin{aligned} \frac{d^2}{dx_j^2} E_{\text{dihedral},ijkl} &= 2k_{\text{dihedral}} \left( -(-\cos \theta_{ijkl} + \cos \theta_{ijk}^0) \frac{d^2}{dx_j^2} \cos \theta_{ijkl} - (-\sin \theta_{ijkl} + \sin \theta_{ijk}^0) \frac{d^2}{dx_j^2} \sin \theta_{ijkl} \right. \\ &\quad \left. + \left( \frac{d}{dx_j} \cos \theta_{ijkl} \right)^2 + \left( \frac{d}{dx_j} \sin \theta_{ijkl} \right)^2 \right) \end{aligned} \quad (273)$$

$$\begin{aligned} \frac{d^2}{dy_j dx_j} E_{\text{dihedral},ijkl} &= 2k_{\text{dihedral}} \left( -(-\cos \theta_{ijkl} + \cos \theta_{ijk}^0) \frac{d^2}{dy_j dx_j} \cos \theta_{ijkl} - (-\sin \theta_{ijkl} + \sin \theta_{ijk}^0) \frac{d^2}{dy_j dx_j} \sin \theta_{ijkl} \right. \\ &\quad \left. + \frac{d}{dx_j} \cos \theta_{ijkl} \frac{d}{dy_j} \cos \theta_{ijkl} + \frac{d}{dx_j} \sin \theta_{ijkl} \frac{d}{dy_j} \sin \theta_{ijkl} \right) \end{aligned} \quad (274)$$

$$\begin{aligned} \frac{d^2}{dz_j dx_j} E_{\text{dihedral},ijkl} &= 2k_{\text{dihedral}} \left( -(-\cos \theta_{ijkl} + \cos \theta_{ijk}^0) \frac{d^2}{dz_j dx_j} \cos \theta_{ijkl} - (-\sin \theta_{ijkl} + \sin \theta_{ijk}^0) \frac{d^2}{dz_j dx_j} \sin \theta_{ijkl} \right. \\ &\quad \left. + \frac{d}{dx_j} \cos \theta_{ijkl} \frac{d}{dz_j} \cos \theta_{ijkl} + \frac{d}{dx_j} \sin \theta_{ijkl} \frac{d}{dz_j} \sin \theta_{ijkl} \right) \end{aligned} \quad (275)$$

$$\begin{aligned} \frac{d^2}{dx_k dx_j} E_{\text{dihedral},ijkl} &= 2k_{\text{dihedral}} \left( -(-\cos \theta_{ijkl} + \cos \theta_{ijk}^0) \frac{d^2}{dx_k dx_j} \cos \theta_{ijkl} - (-\sin \theta_{ijkl} + \sin \theta_{ijk}^0) \frac{d^2}{dx_k dx_j} \sin \theta_{ijkl} \right. \\ &\quad \left. + \frac{d}{dx_j} \cos \theta_{ijkl} \frac{d}{dx_k} \cos \theta_{ijkl} + \frac{d}{dx_j} \sin \theta_{ijkl} \frac{d}{dx_k} \sin \theta_{ijkl} \right) \end{aligned} \quad (276)$$

$$\begin{aligned} \frac{d^2}{dy_k dx_j} E_{\text{dihedral},ijkl} &= 2k_{\text{dihedral}} \left( -(-\cos \theta_{ijkl} + \cos \theta_{ijk}^0) \frac{d^2}{dy_k dx_j} \cos \theta_{ijkl} - (-\sin \theta_{ijkl} + \sin \theta_{ijk}^0) \frac{d^2}{dy_k dx_j} \sin \theta_{ijkl} \right. \\ &\quad \left. + \frac{d}{dx_j} \cos \theta_{ijkl} \frac{d}{dy_k} \cos \theta_{ijkl} + \frac{d}{dx_j} \sin \theta_{ijkl} \frac{d}{dy_k} \sin \theta_{ijkl} \right) \end{aligned} \quad (277)$$

$$\begin{aligned} \frac{d^2}{dz_k dx_j} E_{\text{dihedral},ijkl} &= 2k_{\text{dihedral}} \left( -(-\cos \theta_{ijkl} + \cos \theta_{ijk}^0) \frac{d^2}{dz_k dx_j} \cos \theta_{ijkl} - (-\sin \theta_{ijkl} + \sin \theta_{ijk}^0) \frac{d^2}{dz_k dx_j} \sin \theta_{ijkl} \right. \\ &\quad \left. + \frac{d}{dx_j} \cos \theta_{ijkl} \frac{d}{dz_k} \cos \theta_{ijkl} + \frac{d}{dx_j} \sin \theta_{ijkl} \frac{d}{dz_k} \sin \theta_{ijkl} \right) \end{aligned} \quad (278)$$

$$\begin{aligned} \frac{d^2}{dx_1 dx_j} E_{\text{dihedral},ijkl} &= 2k_{\text{dihedral}} \left( -(-\cos \theta_{ijkl} + \cos \theta_{ijk}^0) \frac{d^2}{dx_1 dx_j} \cos \theta_{ijkl} - (-\sin \theta_{ijkl} + \sin \theta_{ijk}^0) \frac{d^2}{dx_1 dx_j} \sin \theta_{ijkl} \right. \\ &\quad \left. + \frac{d}{dx_j} \cos \theta_{ijkl} \frac{d}{dx_1} \cos \theta_{ijkl} + \frac{d}{dx_j} \sin \theta_{ijkl} \frac{d}{dx_1} \sin \theta_{ijkl} \right) \end{aligned} \quad (279)$$

$$\begin{aligned} \frac{d^2}{dy_1 dx_j} E_{\text{dihedral},ijkl} &= 2k_{\text{dihedral}} \left( -(-\cos \theta_{ijkl} + \cos \theta_{ijk}^0) \frac{d^2}{dy_1 dx_j} \cos \theta_{ijkl} - (-\sin \theta_{ijkl} + \sin \theta_{ijk}^0) \frac{d^2}{dy_1 dx_j} \sin \theta_{ijkl} \right. \\ &\quad \left. + \frac{d}{dx_j} \cos \theta_{ijkl} \frac{d}{dy_1} \cos \theta_{ijkl} + \frac{d}{dx_j} \sin \theta_{ijkl} \frac{d}{dy_1} \sin \theta_{ijkl} \right) \end{aligned} \quad (280)$$

$$\begin{aligned} \frac{d^2}{dz_1 dx_j} E_{\text{dihedral},ijkl} &= 2k_{\text{dihedral}} \left( -(-\cos \theta_{ijkl} + \cos \theta_{ijk}^0) \frac{d^2}{dz_1 dx_j} \cos \theta_{ijkl} - (-\sin \theta_{ijkl} + \sin \theta_{ijk}^0) \frac{d^2}{dz_1 dx_j} \sin \theta_{ijkl} \right. \\ &\quad \left. + \frac{d}{dx_j} \cos \theta_{ijkl} \frac{d}{dz_1} \cos \theta_{ijkl} + \frac{d}{dx_j} \sin \theta_{ijkl} \frac{d}{dz_1} \sin \theta_{ijkl} \right) \end{aligned} \quad (281)$$

$$\begin{aligned} \frac{d^2}{dy_j^2} E_{\text{dihedral},ijkl} &= 2k_{\text{dihedral}} \left( -(-\cos \theta_{ijkl} + \cos \theta_{ijk}^0) \frac{d^2}{dy_j^2} \cos \theta_{ijkl} - (-\sin \theta_{ijkl} + \sin \theta_{ijk}^0) \frac{d^2}{dy_j^2} \sin \theta_{ijkl} \right. \\ &\quad \left. + \left( \frac{d}{dy_j} \cos \theta_{ijkl} \right)^2 + \left( \frac{d}{dy_j} \sin \theta_{ijkl} \right)^2 \right) \end{aligned} \quad (282)$$

$$\begin{aligned} \frac{d^2}{dz_j dy_j} E_{\text{dihedral},ijkl} &= 2k_{\text{dihedral}} \left( -(-\cos \theta_{ijkl} + \cos \theta_{ijk}^0) \frac{d^2}{dz_j dy_j} \cos \theta_{ijkl} - (-\sin \theta_{ijkl} + \sin \theta_{ijk}^0) \frac{d^2}{dz_j dy_j} \sin \theta_{ijkl} \right. \\ &\quad \left. + \frac{d}{dy_j} \cos \theta_{ijkl} \frac{d}{dz_j} \cos \theta_{ijkl} + \frac{d}{dy_j} \sin \theta_{ijkl} \frac{d}{dz_j} \sin \theta_{ijkl} \right) \end{aligned} \quad (283)$$

$$\begin{aligned} \frac{d^2}{dx_k dy_j} E_{\text{dihedral},ijkl} &= 2k_{\text{dihedral}} \left( -(-\cos \theta_{ijkl} + \cos \theta_{ijk}^0) \frac{d^2}{dy_j dx_k} \cos \theta_{ijkl} - (-\sin \theta_{ijkl} + \sin \theta_{ijk}^0) \frac{d^2}{dy_j dx_k} \sin \theta_{ijkl} \right. \\ &\quad \left. + \frac{d}{dx_k} \cos \theta_{ijkl} \frac{d}{dy_j} \cos \theta_{ijkl} + \frac{d}{dx_k} \sin \theta_{ijkl} \frac{d}{dy_j} \sin \theta_{ijkl} \right) \end{aligned} \quad (284)$$

$$\begin{aligned} \frac{d^2}{dy_k dy_j} E_{\text{dihedral},ijkl} &= 2k_{\text{dihedral}} \left( -(-\cos \theta_{ijkl} + \cos \theta_{ijk}^0) \frac{d^2}{dy_k dy_j} \cos \theta_{ijkl} - (-\sin \theta_{ijkl} + \sin \theta_{ijk}^0) \frac{d^2}{dy_k dy_j} \sin \theta_{ijkl} \right. \\ &\quad \left. + \frac{d}{dy_j} \cos \theta_{ijkl} \frac{d}{dy_k} \cos \theta_{ijkl} + \frac{d}{dy_j} \sin \theta_{ijkl} \frac{d}{dy_k} \sin \theta_{ijkl} \right) \end{aligned} \quad (285)$$

$$\begin{aligned} \frac{d^2}{dz_k dy_j} E_{\text{dihedral},ijkl} &= 2k_{\text{dihedral}} \left( -(-\cos \theta_{ijkl} + \cos \theta_{ijk}^0) \frac{d^2}{dz_k dy_j} \cos \theta_{ijkl} - (-\sin \theta_{ijkl} + \sin \theta_{ijk}^0) \frac{d^2}{dz_k dy_j} \sin \theta_{ijkl} \right. \\ &\quad \left. + \frac{d}{dy_j} \cos \theta_{ijkl} \frac{d}{dz_k} \cos \theta_{ijkl} + \frac{d}{dy_j} \sin \theta_{ijkl} \frac{d}{dz_k} \sin \theta_{ijkl} \right) \end{aligned} \quad (286)$$

$$\begin{aligned} \frac{d^2}{dx_l dy_j} E_{\text{dihedral},ijkl} &= 2k_{\text{dihedral}} \left( -(-\cos \theta_{ijkl} + \cos \theta_{ijk}^0) \frac{d^2}{dy_j dx_l} \cos \theta_{ijkl} - (-\sin \theta_{ijkl} + \sin \theta_{ijk}^0) \frac{d^2}{dy_j dx_l} \sin \theta_{ijkl} \right. \\ &\quad \left. + \frac{d}{dx_l} \cos \theta_{ijkl} \frac{d}{dy_j} \cos \theta_{ijkl} + \frac{d}{dx_l} \sin \theta_{ijkl} \frac{d}{dy_j} \sin \theta_{ijkl} \right) \end{aligned} \quad (287)$$

$$\begin{aligned} \frac{d^2}{dy_l dy_j} E_{\text{dihedral},ijkl} &= 2k_{\text{dihedral}} \left( -(-\cos \theta_{ijkl} + \cos \theta_{ijk}^0) \frac{d^2}{dy_l dy_j} \cos \theta_{ijkl} - (-\sin \theta_{ijkl} + \sin \theta_{ijk}^0) \frac{d^2}{dy_l dy_j} \sin \theta_{ijkl} \right. \\ &\quad \left. + \frac{d}{dy_j} \cos \theta_{ijkl} \frac{d}{dy_l} \cos \theta_{ijkl} + \frac{d}{dy_j} \sin \theta_{ijkl} \frac{d}{dy_l} \sin \theta_{ijkl} \right) \end{aligned} \quad (288)$$

$$\begin{aligned} \frac{d^2}{dz_l dy_j} E_{\text{dihedral},ijkl} &= 2k_{\text{dihedral}} \left( -(-\cos \theta_{ijkl} + \cos \theta_{ijk}^0) \frac{d^2}{dz_l dy_j} \cos \theta_{ijkl} - (-\sin \theta_{ijkl} + \sin \theta_{ijk}^0) \frac{d^2}{dz_l dy_j} \sin \theta_{ijkl} \right. \\ &\quad \left. + \frac{d}{dy_j} \cos \theta_{ijkl} \frac{d}{dz_l} \cos \theta_{ijkl} + \frac{d}{dy_j} \sin \theta_{ijkl} \frac{d}{dz_l} \sin \theta_{ijkl} \right) \end{aligned} \quad (289)$$



$$\frac{d^2}{dz_j^2} E_{\text{dihedral},ijkl} = 2k_{\text{dihedral}} \left( -(-\cos \theta_{ijkl} + \cos \theta_{ijk}^0) \frac{d^2}{dz_j^2} \cos \theta_{ijkl} - (-\sin \theta_{ijkl} + \sin \theta_{ijk}^0) \frac{d^2}{dz_j^2} \sin \theta_{ijkl} + \left( \frac{d}{dz_j} \cos \theta_{ijkl} \right)^2 + \left( \frac{d}{dz_j} \sin \theta_{ijkl} \right)^2 \right) \quad (290)$$

$$\frac{d^2}{dx_k dz_j} E_{\text{dihedral},ijkl} = 2k_{\text{dihedral}} \left( -(-\cos \theta_{ijkl} + \cos \theta_{ijk}^0) \frac{d^2}{dz_j dx_k} \cos \theta_{ijkl} - (-\sin \theta_{ijkl} + \sin \theta_{ijk}^0) \frac{d^2}{dz_j dx_k} \sin \theta_{ijkl} + \frac{d}{dx_k} \cos \theta_{ijkl} \frac{d}{dz_j} \cos \theta_{ijkl} + \frac{d}{dx_k} \sin \theta_{ijkl} \frac{d}{dz_j} \sin \theta_{ijkl} \right) \quad (291)$$

$$\frac{d^2}{dy_k dz_j} E_{\text{dihedral},ijkl} = 2k_{\text{dihedral}} \left( -(-\cos \theta_{ijkl} + \cos \theta_{ijk}^0) \frac{d^2}{dz_j dy_k} \cos \theta_{ijkl} - (-\sin \theta_{ijkl} + \sin \theta_{ijk}^0) \frac{d^2}{dz_j dy_k} \sin \theta_{ijkl} + \frac{d}{dy_k} \cos \theta_{ijkl} \frac{d}{dz_j} \cos \theta_{ijkl} + \frac{d}{dy_k} \sin \theta_{ijkl} \frac{d}{dz_j} \sin \theta_{ijkl} \right) \quad (292)$$

$$\frac{d^2}{dz_k dz_j} E_{\text{dihedral},ijkl} = 2k_{\text{dihedral}} \left( -(-\cos \theta_{ijkl} + \cos \theta_{ijk}^0) \frac{d^2}{dz_k dz_j} \cos \theta_{ijkl} - (-\sin \theta_{ijkl} + \sin \theta_{ijk}^0) \frac{d^2}{dz_k dz_j} \sin \theta_{ijkl} + \frac{d}{dz_j} \cos \theta_{ijkl} \frac{d}{dz_k} \cos \theta_{ijkl} + \frac{d}{dz_j} \sin \theta_{ijkl} \frac{d}{dz_k} \sin \theta_{ijkl} \right) \quad (293)$$

$$\frac{d^2}{dx_l dz_j} E_{\text{dihedral},ijkl} = 2k_{\text{dihedral}} \left( -(-\cos \theta_{ijkl} + \cos \theta_{ijk}^0) \frac{d^2}{dz_j dx_l} \cos \theta_{ijkl} - (-\sin \theta_{ijkl} + \sin \theta_{ijk}^0) \frac{d^2}{dz_j dx_l} \sin \theta_{ijkl} + \frac{d}{dx_l} \cos \theta_{ijkl} \frac{d}{dz_j} \cos \theta_{ijkl} + \frac{d}{dx_l} \sin \theta_{ijkl} \frac{d}{dz_j} \sin \theta_{ijkl} \right) \quad (294)$$

$$\frac{d^2}{dy_l dz_j} E_{\text{dihedral},ijkl} = 2k_{\text{dihedral}} \left( -(-\cos \theta_{ijkl} + \cos \theta_{ijk}^0) \frac{d^2}{dz_j dy_l} \cos \theta_{ijkl} - (-\sin \theta_{ijkl} + \sin \theta_{ijk}^0) \frac{d^2}{dz_j dy_l} \sin \theta_{ijkl} + \frac{d}{dy_l} \cos \theta_{ijkl} \frac{d}{dz_j} \cos \theta_{ijkl} + \frac{d}{dy_l} \sin \theta_{ijkl} \frac{d}{dz_j} \sin \theta_{ijkl} \right) \quad (295)$$

$$\frac{d^2}{dz_l dz_j} E_{\text{dihedral},ijkl} = 2k_{\text{dihedral}} \left( -(-\cos \theta_{ijkl} + \cos \theta_{ijk}^0) \frac{d^2}{dz_l dz_j} \cos \theta_{ijkl} - (-\sin \theta_{ijkl} + \sin \theta_{ijk}^0) \frac{d^2}{dz_l dz_j} \sin \theta_{ijkl} + \frac{d}{dz_j} \cos \theta_{ijkl} \frac{d}{dz_l} \cos \theta_{ijkl} + \frac{d}{dz_j} \sin \theta_{ijkl} \frac{d}{dz_l} \sin \theta_{ijkl} \right) \quad (296)$$

$$\begin{aligned} \frac{d^2}{dx_k^2} E_{\text{dihedral},ijkl} &= 2k_{\text{dihedral}} \left( -(-\cos \theta_{ijkl} + \cos \theta_{ijk}^0) \frac{d^2}{dx_k^2} \cos \theta_{ijkl} - (-\sin \theta_{ijkl} + \sin \theta_{ijk}^0) \frac{d^2}{dx_k^2} \sin \theta_{ijkl} + \left( \frac{d}{dx_k} \cos \theta_{ijkl} \right)^2 \right. \\ &\quad \left. + \left( \frac{d}{dx_k} \sin \theta_{ijkl} \right)^2 \right) \end{aligned} \quad (297)$$

$$\begin{aligned} \frac{d^2}{dy_k dx_k} E_{\text{dihedral},ijkl} &= 2k_{\text{dihedral}} \left( -(-\cos \theta_{ijkl} + \cos \theta_{ijk}^0) \frac{d^2}{dy_k dx_k} \cos \theta_{ijkl} - (-\sin \theta_{ijkl} + \sin \theta_{ijk}^0) \frac{d^2}{dy_k dx_k} \sin \theta_{ijkl} \right. \\ &\quad \left. + \frac{d}{dx_k} \cos \theta_{ijkl} \frac{d}{dy_k} \cos \theta_{ijkl} + \frac{d}{dx_k} \sin \theta_{ijkl} \frac{d}{dy_k} \sin \theta_{ijkl} \right) \end{aligned} \quad (298)$$

$$\begin{aligned} \frac{d^2}{dz_k dx_k} E_{\text{dihedral},ijkl} &= 2k_{\text{dihedral}} \left( -(-\cos \theta_{ijkl} + \cos \theta_{ijk}^0) \frac{d^2}{dz_k dx_k} \cos \theta_{ijkl} - (-\sin \theta_{ijkl} + \sin \theta_{ijk}^0) \frac{d^2}{dz_k dx_k} \sin \theta_{ijkl} \right. \\ &\quad \left. + \frac{d}{dx_k} \cos \theta_{ijkl} \frac{d}{dz_k} \cos \theta_{ijkl} + \frac{d}{dx_k} \sin \theta_{ijkl} \frac{d}{dz_k} \sin \theta_{ijkl} \right) \end{aligned} \quad (299)$$

$$\begin{aligned} \frac{d^2}{dx_l dx_k} E_{\text{dihedral},ijkl} &= 2k_{\text{dihedral}} \left( -(-\cos \theta_{ijkl} + \cos \theta_{ijk}^0) \frac{d^2}{dx_l dx_k} \cos \theta_{ijkl} - (-\sin \theta_{ijkl} + \sin \theta_{ijk}^0) \frac{d^2}{dx_l dx_k} \sin \theta_{ijkl} \right. \\ &\quad \left. + \frac{d}{dx_k} \cos \theta_{ijkl} \frac{d}{dx_l} \cos \theta_{ijkl} + \frac{d}{dx_k} \sin \theta_{ijkl} \frac{d}{dx_l} \sin \theta_{ijkl} \right) \end{aligned} \quad (300)$$

$$\begin{aligned} \frac{d^2}{dy_l dx_k} E_{\text{dihedral},ijkl} &= 2k_{\text{dihedral}} \left( -(-\cos \theta_{ijkl} + \cos \theta_{ijk}^0) \frac{d^2}{dy_l dx_k} \cos \theta_{ijkl} - (-\sin \theta_{ijkl} + \sin \theta_{ijk}^0) \frac{d^2}{dy_l dx_k} \sin \theta_{ijkl} \right. \\ &\quad \left. + \frac{d}{dx_k} \cos \theta_{ijkl} \frac{d}{dy_l} \cos \theta_{ijkl} + \frac{d}{dx_k} \sin \theta_{ijkl} \frac{d}{dy_l} \sin \theta_{ijkl} \right) \end{aligned} \quad (301)$$

$$\begin{aligned} \frac{d^2}{dz_l dx_k} E_{\text{dihedral},ijkl} &= 2k_{\text{dihedral}} \left( -(-\cos \theta_{ijkl} + \cos \theta_{ijk}^0) \frac{d^2}{dz_l dx_k} \cos \theta_{ijkl} - (-\sin \theta_{ijkl} + \sin \theta_{ijk}^0) \frac{d^2}{dz_l dx_k} \sin \theta_{ijkl} \right. \\ &\quad \left. + \frac{d}{dx_k} \cos \theta_{ijkl} \frac{d}{dz_l} \cos \theta_{ijkl} + \frac{d}{dx_k} \sin \theta_{ijkl} \frac{d}{dz_l} \sin \theta_{ijkl} \right) \end{aligned} \quad (302)$$

$$\begin{aligned} \frac{d^2}{dy_k^2} E_{\text{dihedral},ijkl} &= 2k_{\text{dihedral}} \left( -(-\cos \theta_{ijkl} + \cos \theta_{ijk}^0) \frac{d^2}{dy_k^2} \cos \theta_{ijkl} - (-\sin \theta_{ijkl} + \sin \theta_{ijk}^0) \frac{d^2}{dy_k^2} \sin \theta_{ijkl} + \left( \frac{d}{dy_k} \cos \theta_{ijkl} \right)^2 \right. \\ &\quad \left. + \left( \frac{d}{dy_k} \sin \theta_{ijkl} \right)^2 \right) \end{aligned} \quad (303)$$

$$\begin{aligned} \frac{d^2}{dz_k dy_k} E_{\text{dihedral},ijkl} &= 2k_{\text{dihedral}} \left( -(-\cos \theta_{ijkl} + \cos \theta_{ijk}^0) \frac{d^2}{dz_k dy_k} \cos \theta_{ijkl} - (-\sin \theta_{ijkl} + \sin \theta_{ijk}^0) \frac{d^2}{dz_k dy_k} \sin \theta_{ijkl} \right. \\ &\quad \left. + \frac{d}{dy_k} \cos \theta_{ijkl} \frac{d}{dz_k} \cos \theta_{ijkl} + \frac{d}{dy_k} \sin \theta_{ijkl} \frac{d}{dz_k} \sin \theta_{ijkl} \right) \end{aligned} \quad (304)$$

$$\begin{aligned} \frac{d^2}{dx_l dy_k} E_{\text{dihedral},ijkl} &= 2k_{\text{dihedral}} \left( -(-\cos \theta_{ijkl} + \cos \theta_{ijk}^0) \frac{d^2}{dy_k dx_l} \cos \theta_{ijkl} - (-\sin \theta_{ijkl} + \sin \theta_{ijk}^0) \frac{d^2}{dy_k dx_l} \sin \theta_{ijkl} \right. \\ &\quad \left. + \frac{d}{dx_l} \cos \theta_{ijkl} \frac{d}{dy_k} \cos \theta_{ijkl} + \frac{d}{dx_l} \sin \theta_{ijkl} \frac{d}{dy_k} \sin \theta_{ijkl} \right) \end{aligned} \quad (305)$$

$$\begin{aligned} \frac{d^2}{dy_l dy_k} E_{\text{dihedral},ijkl} &= 2k_{\text{dihedral}} \left( -(-\cos \theta_{ijkl} + \cos \theta_{ijk}^0) \frac{d^2}{dy_l dy_k} \cos \theta_{ijkl} - (-\sin \theta_{ijkl} + \sin \theta_{ijk}^0) \frac{d^2}{dy_l dy_k} \sin \theta_{ijkl} \right. \\ &\quad \left. + \frac{d}{dy_k} \cos \theta_{ijkl} \frac{d}{dy_l} \cos \theta_{ijkl} + \frac{d}{dy_k} \sin \theta_{ijkl} \frac{d}{dy_l} \sin \theta_{ijkl} \right) \end{aligned} \quad (306)$$

$$\begin{aligned} \frac{d^2}{dz_l dy_k} E_{\text{dihedral},ijkl} &= 2k_{\text{dihedral}} \left( -(-\cos \theta_{ijkl} + \cos \theta_{ijk}^0) \frac{d^2}{dz_l dy_k} \cos \theta_{ijkl} - (-\sin \theta_{ijkl} + \sin \theta_{ijk}^0) \frac{d^2}{dz_l dy_k} \sin \theta_{ijkl} \right. \\ &\quad \left. + \frac{d}{dy_k} \cos \theta_{ijkl} \frac{d}{dz_l} \cos \theta_{ijkl} + \frac{d}{dy_k} \sin \theta_{ijkl} \frac{d}{dz_l} \sin \theta_{ijkl} \right) \end{aligned} \quad (307)$$

$$\begin{aligned} \frac{d^2}{dz_k^2} E_{\text{dihedral},ijkl} &= 2k_{\text{dihedral}} \left( -(-\cos \theta_{ijkl} + \cos \theta_{ijk}^0) \frac{d^2}{dz_k^2} \cos \theta_{ijkl} - (-\sin \theta_{ijkl} + \sin \theta_{ijk}^0) \frac{d^2}{dz_k^2} \sin \theta_{ijkl} \right. \\ &\quad \left. + \left( \frac{d}{dz_k} \cos \theta_{ijkl} \right)^2 + \left( \frac{d}{dz_k} \sin \theta_{ijkl} \right)^2 \right) \end{aligned} \quad (308)$$

$$\begin{aligned} \frac{d^2}{dx_l dz_k} E_{\text{dihedral},ijkl} &= 2k_{\text{dihedral}} \left( -(-\cos \theta_{ijkl} + \cos \theta_{ijk}^0) \frac{d^2}{dz_k dx_l} \cos \theta_{ijkl} - (-\sin \theta_{ijkl} + \sin \theta_{ijk}^0) \frac{d^2}{dz_k dx_l} \sin \theta_{ijkl} \right. \\ &\quad \left. + \frac{d}{dx_l} \cos \theta_{ijkl} \frac{d}{dz_k} \cos \theta_{ijkl} + \frac{d}{dx_l} \sin \theta_{ijkl} \frac{d}{dz_k} \sin \theta_{ijkl} \right) \end{aligned} \quad (309)$$

$$\begin{aligned} \frac{d^2}{dy_l dz_k} E_{\text{dihedral},ijkl} &= 2k_{\text{dihedral}} \left( -(-\cos \theta_{ijkl} + \cos \theta_{ijk}^0) \frac{d^2}{dz_k dy_l} \cos \theta_{ijkl} - (-\sin \theta_{ijkl} + \sin \theta_{ijk}^0) \frac{d^2}{dz_k dy_l} \sin \theta_{ijkl} \right. \\ &\quad \left. + \frac{d}{dy_l} \cos \theta_{ijkl} \frac{d}{dz_k} \cos \theta_{ijkl} + \frac{d}{dy_l} \sin \theta_{ijkl} \frac{d}{dz_k} \sin \theta_{ijkl} \right) \end{aligned} \quad (310)$$

$$\begin{aligned} \frac{d^2}{dz_l dz_k} E_{\text{dihedral},ijkl} &= 2k_{\text{dihedral}} \left( -(-\cos \theta_{ijkl} + \cos \theta_{ijk}^0) \frac{d^2}{dz_l dz_k} \cos \theta_{ijkl} - (-\sin \theta_{ijkl} + \sin \theta_{ijk}^0) \frac{d^2}{dz_l dz_k} \sin \theta_{ijkl} \right. \\ &\quad \left. + \frac{d}{dz_k} \cos \theta_{ijkl} \frac{d}{dz_l} \cos \theta_{ijkl} + \frac{d}{dz_k} \sin \theta_{ijkl} \frac{d}{dz_l} \sin \theta_{ijkl} \right) \end{aligned} \quad (311)$$

$$\frac{d^2}{dx_l^2} E_{\text{dihedral},ijkl} = 2k_{\text{dihedral}} \left( -(-\cos \theta_{ijkl} + \cos \theta_{ijk}^0) \frac{d^2}{dx_l^2} \cos \theta_{ijkl} - (-\sin \theta_{ijkl} + \sin \theta_{ijk}^0) \frac{d^2}{dx_l^2} \sin \theta_{ijkl} + \left( \frac{d}{dx_l} \cos \theta_{ijkl} \right)^2 + \left( \frac{d}{dx_l} \sin \theta_{ijkl} \right)^2 \right) \quad (312)$$

$$\begin{aligned} \frac{d^2}{dy_l dx_l} E_{\text{dihedral},ijkl} &= 2k_{\text{dihedral}} \left( -(-\cos \theta_{ijkl} + \cos \theta_{ijk}^0) \frac{d^2}{dy_l dx_l} \cos \theta_{ijkl} - (-\sin \theta_{ijkl} + \sin \theta_{ijk}^0) \frac{d^2}{dy_l dx_l} \sin \theta_{ijkl} \right. \\ &\quad \left. + \frac{d}{dx_l} \cos \theta_{ijkl} \frac{d}{dy_l} \cos \theta_{ijkl} + \frac{d}{dx_l} \sin \theta_{ijkl} \frac{d}{dy_l} \sin \theta_{ijkl} \right) \end{aligned} \quad (313)$$

$$\begin{aligned} \frac{d^2}{dz_l dx_l} E_{\text{dihedral},ijkl} &= 2k_{\text{dihedral}} \left( -(-\cos \theta_{ijkl} + \cos \theta_{ijk}^0) \frac{d^2}{dz_l dx_l} \cos \theta_{ijkl} - (-\sin \theta_{ijkl} + \sin \theta_{ijk}^0) \frac{d^2}{dz_l dx_l} \sin \theta_{ijkl} \right. \\ &\quad \left. + \frac{d}{dx_l} \cos \theta_{ijkl} \frac{d}{dz_l} \cos \theta_{ijkl} + \frac{d}{dx_l} \sin \theta_{ijkl} \frac{d}{dz_l} \sin \theta_{ijkl} \right) \end{aligned} \quad (314)$$

$$\begin{aligned} \frac{d^2}{dy_l^2} E_{\text{dihedral},ijkl} &= 2k_{\text{dihedral}} \left( -(-\cos \theta_{ijkl} + \cos \theta_{ijk}^0) \frac{d^2}{dy_l^2} \cos \theta_{ijkl} - (-\sin \theta_{ijkl} + \sin \theta_{ijk}^0) \frac{d^2}{dy_l^2} \sin \theta_{ijkl} \right. \\ &\quad \left. + \left( \frac{d}{dy_l} \cos \theta_{ijkl} \right)^2 + \left( \frac{d}{dy_l} \sin \theta_{ijkl} \right)^2 \right) \end{aligned} \quad (315)$$

$$\begin{aligned} \frac{d^2}{dz_l dy_l} E_{\text{dihedral},ijkl} &= 2k_{\text{dihedral}} \left( -(-\cos \theta_{ijkl} + \cos \theta_{ijk}^0) \frac{d^2}{dz_l dy_l} \cos \theta_{ijkl} - (-\sin \theta_{ijkl} + \sin \theta_{ijk}^0) \frac{d^2}{dz_l dy_l} \sin \theta_{ijkl} \right. \\ &\quad \left. + \frac{d}{dy_l} \cos \theta_{ijkl} \frac{d}{dz_l} \cos \theta_{ijkl} + \frac{d}{dy_l} \sin \theta_{ijkl} \frac{d}{dz_l} \sin \theta_{ijkl} \right) \end{aligned} \quad (316)$$

$$\begin{aligned} \frac{d^2}{dz_l^2} E_{\text{dihedral},ijkl} &= 2k_{\text{dihedral}} \left( -(-\cos \theta_{ijkl} + \cos \theta_{ijk}^0) \frac{d^2}{dz_l^2} \cos \theta_{ijkl} - (-\sin \theta_{ijkl} + \sin \theta_{ijk}^0) \frac{d^2}{dz_l^2} \sin \theta_{ijkl} \right. \\ &\quad \left. + \left( \frac{d}{dz_l} \cos \theta_{ijkl} \right)^2 + \left( \frac{d}{dz_l} \sin \theta_{ijkl} \right)^2 \right) \end{aligned} \quad (317)$$

The derivatives of  $\cos \theta_{ijkl}$  and  $\sin \theta_{ijkl}$  with respect to the coordinates  $x$ ,  $y$  and  $z$  of the participating atoms  $i$ ,  $j$ ,  $k$  and  $l$  are defined in Section S1.3.2. The derivatives of  $\cos \theta_{ijkl}$  and  $\sin \theta_{ijkl}$  are identical, except for interchanging  $a_{ijkl}$  and  $d_{ijkl}$ .

### S1.3.2 Derivatives of $\cos \theta_{ijkl}$

The first and second order derivatives of  $\cos \theta_{ijkl}$  with respect to the coordinates  $x$ ,  $y$  and  $z$  of the participating atoms  $i$ ,  $j$ ,  $k$  and  $l$  are:

$$\frac{d}{dx_i} \cos \theta_{ijkl} = \frac{-a_{ijkl} \frac{d}{dx_i} b_{ijk} + b_{ijk} \frac{d}{dx_i} a_{ijkl}}{b_{ijk}^2 c_{jkl}} \quad (318)$$

$$\frac{d}{dy_i} \cos \theta_{ijkl} = \frac{-a_{ijkl} \frac{d}{dy_i} b_{ijk} + b_{ijk} \frac{d}{dy_i} a_{ijkl}}{b_{ijk}^2 c_{jkl}} \quad (319)$$

$$\frac{d}{dz_i} \cos \theta_{ijkl} = \frac{-a_{ijkl} \frac{d}{dz_i} b_{ijk} + b_{ijk} \frac{d}{dz_i} a_{ijkl}}{b_{ijk}^2 c_{jkl}} \quad (320)$$

$$\frac{d}{dx_j} \cos \theta_{ijkl} = \frac{-a_{ijkl} b_{ijk} \frac{d}{dx_j} c_{jkl} - a_{ijkl} c_{jkl} \frac{d}{dx_j} b_{ijk} + b_{ijk} c_{jkl} \frac{d}{dx_j} a_{ijkl}}{b_{ijk}^2 c_{jkl}^2} \quad (321)$$

$$\frac{d}{dy_j} \cos \theta_{ijkl} = \frac{-a_{ijkl} b_{ijk} \frac{d}{dy_j} c_{jkl} - a_{ijkl} c_{jkl} \frac{d}{dy_j} b_{ijk} + b_{ijk} c_{jkl} \frac{d}{dy_j} a_{ijkl}}{b_{ijk}^2 c_{jkl}^2} \quad (322)$$

$$\frac{d}{dz_j} \cos \theta_{ijkl} = \frac{-a_{ijkl} b_{ijk} \frac{d}{dz_j} c_{jkl} - a_{ijkl} c_{jkl} \frac{d}{dz_j} b_{ijk} + b_{ijk} c_{jkl} \frac{d}{dz_j} a_{ijkl}}{b_{ijk}^2 c_{jkl}^2} \quad (323)$$

$$\frac{d}{dx_k} \cos \theta_{ijkl} = \frac{-a_{ijkl} b_{ijk} \frac{d}{dx_k} c_{jkl} - a_{ijkl} c_{jkl} \frac{d}{dx_k} b_{ijk} + b_{ijk} c_{jkl} \frac{d}{dx_k} a_{ijkl}}{b_{ijk}^2 c_{jkl}^2} \quad (324)$$

$$\frac{d}{dy_k} \cos \theta_{ijkl} = \frac{-a_{ijkl} b_{ijk} \frac{d}{dy_k} c_{jkl} - a_{ijkl} c_{jkl} \frac{d}{dy_k} b_{ijk} + b_{ijk} c_{jkl} \frac{d}{dy_k} a_{ijkl}}{b_{ijk}^2 c_{jkl}^2} \quad (325)$$

$$\frac{d}{dz_k} \cos \theta_{ijkl} = \frac{-a_{ijkl} b_{ijk} \frac{d}{dz_k} c_{jkl} - a_{ijkl} c_{jkl} \frac{d}{dz_k} b_{ijk} + b_{ijk} c_{jkl} \frac{d}{dz_k} a_{ijkl}}{b_{ijk}^2 c_{jkl}^2} \quad (326)$$

$$\frac{d}{dx_l} \cos \theta_{ijkl} = \frac{-a_{ijkl} \frac{d}{dx_l} c_{jkl} + c_{jkl} \frac{d}{dx_l} a_{ijkl}}{b_{ijk} c_{jkl}^2} \quad (327)$$

$$\frac{d}{dy_l} \cos \theta_{ijkl} = \frac{-a_{ijkl} \frac{d}{dy_l} c_{jkl} + c_{jkl} \frac{d}{dy_l} a_{ijkl}}{b_{ijk} c_{jkl}^2} \quad (328)$$

$$\frac{d}{dz_l} \cos \theta_{ijkl} = \frac{-a_{ijkl} \frac{d}{dz_l} c_{jkl} + c_{jkl} \frac{d}{dz_l} a_{ijkl}}{b_{ijk} c_{jkl}^2} \quad (329)$$

$$\frac{d^2}{dx_i^2} \cos \theta_{ijkl} = \frac{-a_{ijkl} \frac{d^2}{dx_i^2} b_{ijk} + b_{ijk} \frac{d^2}{dx_i^2} a_{ijkl}}{b_{ijk}^2 c_{jkl}} - \frac{2 \left( -a_{ijkl} \frac{d}{dx_i} b_{ijk} + b_{ijk} \frac{d}{dx_i} a_{ijkl} \right) \frac{d}{dx_i} b_{ijk}}{b_{ijk}^3 c_{jkl}} \quad (330)$$

$$\frac{d^2}{dy_i dx_i} \cos \theta_{ijkl} = \frac{-a_{ijkl} \frac{d^2}{dy_i dx_i} b_{ijk} + b_{ijk} \frac{d^2}{dy_i dx_i} a_{ijkl} + \frac{d}{dx_i} a_{ijkl} \frac{d}{dy_i} b_{ijk} - \frac{d}{dy_i} a_{ijkl} \frac{d}{dx_i} b_{ijk}}{b_{ijk}^2 c_{jkl}} - \frac{2 \left( -a_{ijkl} \frac{d}{dx_i} b_{ijk} + b_{ijk} \frac{d}{dx_i} a_{ijkl} \right) \frac{d}{dy_i} b_{ijk}}{b_{ijk}^3 c_{jkl}} \quad (331)$$

$$\frac{d^2}{dz_i dx_i} \cos \theta_{ijkl} = \frac{-a_{ijkl} \frac{d^2}{dz_i dx_i} b_{ijk} + b_{ijk} \frac{d^2}{dz_i dx_i} a_{ijkl} + \frac{d}{dx_i} a_{ijkl} \frac{d}{dz_i} b_{ijk} - \frac{d}{dz_i} a_{ijkl} \frac{d}{dx_i} b_{ijk}}{b_{ijk}^2 c_{jkl}} - \frac{2 \left( -a_{ijkl} \frac{d}{dx_i} b_{ijk} + b_{ijk} \frac{d}{dx_i} a_{ijkl} \right) \frac{d}{dz_i} b_{ijk}}{b_{ijk}^3 c_{jkl}} \quad (332)$$

$$\begin{aligned} \frac{d^2}{dx_j dx_i} \cos \theta_{ijkl} &= \frac{-a_{ijkl} \frac{d^2}{dx_j dx_i} b_{ijk} + b_{ijk} \frac{d^2}{dx_j dx_i} a_{ijkl} + \frac{d}{dx_i} a_{ijkl} \frac{d}{dx_j} b_{ijk} - \frac{d}{dx_j} a_{ijkl} \frac{d}{dx_i} b_{ijk}}{b_{ijk}^2 c_{jkl}} \\ &- \frac{\left( -a_{ijkl} \frac{d}{dx_i} b_{ijk} + b_{ijk} \frac{d}{dx_i} a_{ijkl} \right) \frac{d}{dx_j} c_{jkl}}{b_{ijk}^2 c_{jkl}^2} \\ &- \frac{2 \left( -a_{ijkl} \frac{d}{dx_i} b_{ijk} + b_{ijk} \frac{d}{dx_i} a_{ijkl} \right) \frac{d}{dx_j} b_{ijk}}{b_{ijk}^3 c_{jkl}} \end{aligned} \quad (333)$$

$$\begin{aligned} \frac{d^2}{dy_j dx_i} \cos \theta_{ijkl} &= \frac{-a_{ijkl} \frac{d^2}{dy_j dx_i} b_{ijk} + b_{ijk} \frac{d^2}{dy_j dx_i} a_{ijkl} + \frac{d}{dx_i} a_{ijkl} \frac{d}{dy_j} b_{ijk} - \frac{d}{dy_j} a_{ijkl} \frac{d}{dx_i} b_{ijk}}{b_{ijk}^2 c_{jkl}} \\ &- \frac{\left( -a_{ijkl} \frac{d}{dx_i} b_{ijk} + b_{ijk} \frac{d}{dx_i} a_{ijkl} \right) \frac{d}{dy_j} c_{jkl}}{b_{ijk}^2 c_{jkl}^2} \\ &- \frac{2 \left( -a_{ijkl} \frac{d}{dx_i} b_{ijk} + b_{ijk} \frac{d}{dx_i} a_{ijkl} \right) \frac{d}{dy_j} b_{ijk}}{b_{ijk}^3 c_{jkl}} \end{aligned} \quad (334)$$

$$\begin{aligned} \frac{d^2}{dz_j dx_i} \cos \theta_{ijkl} &= \frac{-a_{ijkl} \frac{d^2}{dz_j dx_i} b_{ijk} + b_{ijk} \frac{d^2}{dz_j dx_i} a_{ijkl} + \frac{d}{dx_i} a_{ijkl} \frac{d}{dz_j} b_{ijk} - \frac{d}{dz_j} a_{ijkl} \frac{d}{dx_i} b_{ijk}}{b_{ijk}^2 c_{jkl}} \\ &- \frac{\left( -a_{ijkl} \frac{d}{dx_i} b_{ijk} + b_{ijk} \frac{d}{dx_i} a_{ijkl} \right) \frac{d}{dz_j} c_{jkl}}{b_{ijk}^2 c_{jkl}^2} \\ &- \frac{2 \left( -a_{ijkl} \frac{d}{dx_i} b_{ijk} + b_{ijk} \frac{d}{dx_i} a_{ijkl} \right) \frac{d}{dz_j} b_{ijk}}{b_{ijk}^3 c_{jkl}} \end{aligned} \quad (335)$$

$$\frac{d^2}{dx_k dx_i} \cos \theta_{ijkl} = \frac{-a_{ijkl} \frac{d^2}{dx_k dx_i} b_{ijk} + b_{ijk} \frac{d^2}{dx_k dx_i} a_{ijkl} + \frac{d}{dx_i} a_{ijkl} \frac{d}{dx_k} b_{ijk} - \frac{d}{dx_k} a_{ijkl} \frac{d}{dx_i} b_{ijk}}{b_{ijk}^2 c_{jkl}} \quad (336)$$

$$- \frac{\left(-a_{ijkl} \frac{d}{dx_i} b_{ijk} + b_{ijk} \frac{d}{dx_i} a_{ijkl}\right) \frac{d}{dx_k} c_{jkl}}{b_{ijk}^2 c_{jkl}^2}$$

$$- \frac{2 \left(-a_{ijkl} \frac{d}{dx_i} b_{ijk} + b_{ijk} \frac{d}{dx_i} a_{ijkl}\right) \frac{d}{dx_k} b_{ijk}}{b_{ijk}^3 c_{jkl}}$$

$$\frac{d^2}{dy_k dx_i} \cos \theta_{ijkl} = \frac{-a_{ijkl} \frac{d^2}{dy_k dx_i} b_{ijk} + b_{ijk} \frac{d^2}{dy_k dx_i} a_{ijkl} + \frac{d}{dx_i} a_{ijkl} \frac{d}{dy_k} b_{ijk} - \frac{d}{dy_k} a_{ijkl} \frac{d}{dx_i} b_{ijk}}{b_{ijk}^2 c_{jkl}} \quad (337)$$

$$- \frac{\left(-a_{ijkl} \frac{d}{dx_i} b_{ijk} + b_{ijk} \frac{d}{dx_i} a_{ijkl}\right) \frac{d}{dy_k} c_{jkl}}{b_{ijk}^2 c_{jkl}^2}$$

$$- \frac{2 \left(-a_{ijkl} \frac{d}{dx_i} b_{ijk} + b_{ijk} \frac{d}{dx_i} a_{ijkl}\right) \frac{d}{dy_k} b_{ijk}}{b_{ijk}^3 c_{jkl}}$$

$$\frac{d^2}{dz_k dx_i} \cos \theta_{ijkl} = \frac{-a_{ijkl} \frac{d^2}{dz_k dx_i} b_{ijk} + b_{ijk} \frac{d^2}{dz_k dx_i} a_{ijkl} + \frac{d}{dx_i} a_{ijkl} \frac{d}{dz_k} b_{ijk} - \frac{d}{dz_k} a_{ijkl} \frac{d}{dx_i} b_{ijk}}{b_{ijk}^2 c_{jkl}} \quad (338)$$

$$- \frac{\left(-a_{ijkl} \frac{d}{dx_i} b_{ijk} + b_{ijk} \frac{d}{dx_i} a_{ijkl}\right) \frac{d}{dz_k} c_{jkl}}{b_{ijk}^2 c_{jkl}^2}$$

$$- \frac{2 \left(-a_{ijkl} \frac{d}{dx_i} b_{ijk} + b_{ijk} \frac{d}{dx_i} a_{ijkl}\right) \frac{d}{dz_k} b_{ijk}}{b_{ijk}^3 c_{jkl}}$$

$$\frac{d^2}{dx_l dx_i} \cos \theta_{ijkl} = \frac{b_{ijk} \frac{d^2}{dx_l dx_i} a_{ijkl} - \frac{d}{dx_l} a_{ijkl} \frac{d}{dx_i} b_{ijk}}{b_{ijk}^2 c_{jkl}} - \frac{\left(-a_{ijkl} \frac{d}{dx_i} b_{ijk} + b_{ijk} \frac{d}{dx_i} a_{ijkl}\right) \frac{d}{dx_l} c_{jkl}}{b_{ijk}^2 c_{jkl}^2} \quad (339)$$

$$\frac{d^2}{dy_l dx_i} \cos \theta_{ijkl} = \frac{b_{ijk} \frac{d^2}{dy_l dx_i} a_{ijkl} - \frac{d}{dy_l} a_{ijkl} \frac{d}{dx_i} b_{ijk}}{b_{ijk}^2 c_{jkl}} - \frac{\left(-a_{ijkl} \frac{d}{dx_i} b_{ijk} + b_{ijk} \frac{d}{dx_i} a_{ijkl}\right) \frac{d}{dy_l} c_{jkl}}{b_{ijk}^2 c_{jkl}^2} \quad (340)$$

$$\frac{d^2}{dz_l dx_i} \cos \theta_{ijkl} = \frac{b_{ijk} \frac{d^2}{dz_l dx_i} a_{ijkl} - \frac{d}{dz_l} a_{ijkl} \frac{d}{dx_i} b_{ijk}}{b_{ijk}^2 c_{jkl}} - \frac{\left(-a_{ijkl} \frac{d}{dx_i} b_{ijk} + b_{ijk} \frac{d}{dx_i} a_{ijkl}\right) \frac{d}{dz_l} c_{jkl}}{b_{ijk}^2 c_{jkl}^2} \quad (341)$$

$$\frac{d^2}{dy_i^2} \cos \theta_{ijkl} = \frac{-a_{ijkl} \frac{d^2}{dy_i^2} b_{ijk} + b_{ijk} \frac{d^2}{dy_i^2} a_{ijkl}}{b_{ijk}^2 c_{jkl}} - \frac{2 \left( -a_{ijkl} \frac{d}{dy_i} b_{ijk} + b_{ijk} \frac{d}{dy_i} a_{ijkl} \right) \frac{d}{dy_i} b_{ijk}}{b_{ijk}^3 c_{jkl}} \quad (342)$$

$$\begin{aligned} \frac{d^2}{dz_i dy_i} \cos \theta_{ijkl} &= \frac{-a_{ijkl} \frac{d^2}{dz_i dy_i} b_{ijk} + b_{ijk} \frac{d^2}{dz_i dy_i} a_{ijkl} + \frac{d}{dy_i} a_{ijkl} \frac{d}{dz_i} b_{ijk} - \frac{d}{dz_i} a_{ijkl} \frac{d}{dy_i} b_{ijk}}{b_{ijk}^2 c_{jkl}} \\ &- \frac{2 \left( -a_{ijkl} \frac{d}{dy_i} b_{ijk} + b_{ijk} \frac{d}{dy_i} a_{ijkl} \right) \frac{d}{dz_i} b_{ijk}}{b_{ijk}^3 c_{jkl}} \end{aligned} \quad (343)$$

$$\begin{aligned} \frac{d^2}{dx_j dy_i} \cos \theta_{ijkl} &= \frac{-a_{ijkl} \frac{d^2}{dy_i dx_j} b_{ijk} + b_{ijk} \frac{d^2}{dy_i dx_j} a_{ijkl} - \frac{d}{dx_j} a_{ijkl} \frac{d}{dy_i} b_{ijk} + \frac{d}{dy_i} a_{ijkl} \frac{d}{dx_j} b_{ijk}}{b_{ijk}^2 c_{jkl}} \\ &- \frac{\left( -a_{ijkl} \frac{d}{dy_i} b_{ijk} + b_{ijk} \frac{d}{dy_i} a_{ijkl} \right) \frac{d}{dx_j} c_{jkl}}{b_{ijk}^2 c_{jkl}^2} \\ &- \frac{2 \left( -a_{ijkl} \frac{d}{dy_i} b_{ijk} + b_{ijk} \frac{d}{dy_i} a_{ijkl} \right) \frac{d}{dx_j} b_{ijk}}{b_{ijk}^3 c_{jkl}} \end{aligned} \quad (344)$$

$$\begin{aligned} \frac{d^2}{dy_j dy_i} \cos \theta_{ijkl} &= \frac{-a_{ijkl} \frac{d^2}{dy_j dy_i} b_{ijk} + b_{ijk} \frac{d^2}{dy_j dy_i} a_{ijkl} + \frac{d}{dy_i} a_{ijkl} \frac{d}{dy_j} b_{ijk} - \frac{d}{dy_j} a_{ijkl} \frac{d}{dy_i} b_{ijk}}{b_{ijk}^2 c_{jkl}} \\ &- \frac{\left( -a_{ijkl} \frac{d}{dy_i} b_{ijk} + b_{ijk} \frac{d}{dy_i} a_{ijkl} \right) \frac{d}{dy_j} c_{jkl}}{b_{ijk}^2 c_{jkl}^2} \\ &- \frac{2 \left( -a_{ijkl} \frac{d}{dy_i} b_{ijk} + b_{ijk} \frac{d}{dy_i} a_{ijkl} \right) \frac{d}{dy_j} b_{ijk}}{b_{ijk}^3 c_{jkl}} \end{aligned} \quad (345)$$

$$\begin{aligned} \frac{d^2}{dz_j dy_i} \cos \theta_{ijkl} &= \frac{-a_{ijkl} \frac{d^2}{dz_j dy_i} b_{ijk} + b_{ijk} \frac{d^2}{dz_j dy_i} a_{ijkl} + \frac{d}{dy_i} a_{ijkl} \frac{d}{dz_j} b_{ijk} - \frac{d}{dz_j} a_{ijkl} \frac{d}{dy_i} b_{ijk}}{b_{ijk}^2 c_{jkl}} \\ &- \frac{\left( -a_{ijkl} \frac{d}{dy_i} b_{ijk} + b_{ijk} \frac{d}{dy_i} a_{ijkl} \right) \frac{d}{dz_j} c_{jkl}}{b_{ijk}^2 c_{jkl}^2} \\ &- \frac{2 \left( -a_{ijkl} \frac{d}{dy_i} b_{ijk} + b_{ijk} \frac{d}{dy_i} a_{ijkl} \right) \frac{d}{dz_j} b_{ijk}}{b_{ijk}^3 c_{jkl}} \end{aligned} \quad (346)$$



$$\frac{d^2}{dx_k dy_i} \cos \theta_{ijkl} = \frac{-a_{ijkl} \frac{d^2}{dy_i dx_k} b_{ijk} + b_{ijk} \frac{d^2}{dy_i dx_k} a_{ijkl} - \frac{d}{dx_k} a_{ijkl} \frac{d}{dy_i} b_{ijk} + \frac{d}{dy_i} a_{ijkl} \frac{d}{dx_k} b_{ijk}}{b_{ijk}^2 c_{jkl}} \quad (347)$$

$$- \frac{\left(-a_{ijkl} \frac{d}{dy_i} b_{ijk} + b_{ijk} \frac{d}{dy_i} a_{ijkl}\right) \frac{d}{dx_k} c_{jkl}}{b_{ijk}^2 c_{jkl}^2}$$

$$- \frac{2 \left(-a_{ijkl} \frac{d}{dy_i} b_{ijk} + b_{ijk} \frac{d}{dy_i} a_{ijkl}\right) \frac{d}{dx_k} b_{ijk}}{b_{ijk}^3 c_{jkl}}$$

$$\frac{d^2}{dy_k dy_i} \cos \theta_{ijkl} = \frac{-a_{ijkl} \frac{d^2}{dy_k dy_i} b_{ijk} + b_{ijk} \frac{d^2}{dy_k dy_i} a_{ijkl} + \frac{d}{dy_i} a_{ijkl} \frac{d}{dy_k} b_{ijk} - \frac{d}{dy_k} a_{ijkl} \frac{d}{dy_i} b_{ijk}}{b_{ijk}^2 c_{jkl}} \quad (348)$$

$$- \frac{\left(-a_{ijkl} \frac{d}{dy_i} b_{ijk} + b_{ijk} \frac{d}{dy_i} a_{ijkl}\right) \frac{d}{dy_k} c_{jkl}}{b_{ijk}^2 c_{jkl}^2}$$

$$- \frac{2 \left(-a_{ijkl} \frac{d}{dy_i} b_{ijk} + b_{ijk} \frac{d}{dy_i} a_{ijkl}\right) \frac{d}{dy_k} b_{ijk}}{b_{ijk}^3 c_{jkl}}$$

$$\frac{d^2}{dz_k dy_i} \cos \theta_{ijkl} = \frac{-a_{ijkl} \frac{d^2}{dz_k dy_i} b_{ijk} + b_{ijk} \frac{d^2}{dz_k dy_i} a_{ijkl} + \frac{d}{dy_i} a_{ijkl} \frac{d}{dz_k} b_{ijk} - \frac{d}{dz_k} a_{ijkl} \frac{d}{dy_i} b_{ijk}}{b_{ijk}^2 c_{jkl}} \quad (349)$$

$$- \frac{\left(-a_{ijkl} \frac{d}{dy_i} b_{ijk} + b_{ijk} \frac{d}{dy_i} a_{ijkl}\right) \frac{d}{dz_k} c_{jkl}}{b_{ijk}^2 c_{jkl}^2}$$

$$- \frac{2 \left(-a_{ijkl} \frac{d}{dy_i} b_{ijk} + b_{ijk} \frac{d}{dy_i} a_{ijkl}\right) \frac{d}{dz_k} b_{ijk}}{b_{ijk}^3 c_{jkl}}$$

$$\frac{d^2}{dx_l dy_i} \cos \theta_{ijkl} = \frac{b_{ijk} \frac{d^2}{dy_i dx_l} a_{ijkl} - \frac{d}{dx_l} a_{ijkl} \frac{d}{dy_i} b_{ijk}}{b_{ijk}^2 c_{jkl}} - \frac{\left(-a_{ijkl} \frac{d}{dy_i} b_{ijk} + b_{ijk} \frac{d}{dy_i} a_{ijkl}\right) \frac{d}{dx_l} c_{jkl}}{b_{ijk}^2 c_{jkl}^2} \quad (350)$$

$$\frac{d^2}{dy_l dy_i} \cos \theta_{ijkl} = \frac{b_{ijk} \frac{d^2}{dy_l dy_i} a_{ijkl} - \frac{d}{dy_l} a_{ijkl} \frac{d}{dy_i} b_{ijk}}{b_{ijk}^2 c_{jkl}} - \frac{\left(-a_{ijkl} \frac{d}{dy_i} b_{ijk} + b_{ijk} \frac{d}{dy_i} a_{ijkl}\right) \frac{d}{dy_l} c_{jkl}}{b_{ijk}^2 c_{jkl}^2} \quad (351)$$

$$\frac{d^2}{dz_l dy_i} \cos \theta_{ijkl} = \frac{b_{ijk} \frac{d^2}{dz_l dy_i} a_{ijkl} - \frac{d}{dz_l} a_{ijkl} \frac{d}{dy_i} b_{ijk}}{b_{ijk}^2 c_{jkl}} - \frac{\left(-a_{ijkl} \frac{d}{dy_i} b_{ijk} + b_{ijk} \frac{d}{dy_i} a_{ijkl}\right) \frac{d}{dz_l} c_{jkl}}{b_{ijk}^2 c_{jkl}^2} \quad (352)$$

$$\frac{d^2}{dz_i^2} \cos \theta_{ijkl} = \frac{-a_{ijkl} \frac{d^2}{dz_i^2} b_{ijk} + b_{ijk} \frac{d^2}{dz_i^2} a_{ijkl}}{b_{ijk}^2 c_{jkl}} - \frac{2 \left( -a_{ijkl} \frac{d}{dz_i} b_{ijk} + b_{ijk} \frac{d}{dz_i} a_{ijkl} \right) \frac{d}{dz_i} b_{ijk}}{b_{ijk}^3 c_{jkl}} \quad (353)$$

$$\begin{aligned} \frac{d^2}{dx_j dz_i} \cos \theta_{ijkl} &= \frac{-a_{ijkl} \frac{d^2}{dz_i dx_j} b_{ijk} + b_{ijk} \frac{d^2}{dz_i dx_j} a_{ijkl} - \frac{d}{dx_j} a_{ijkl} \frac{d}{dz_i} b_{ijk} + \frac{d}{dz_i} a_{ijkl} \frac{d}{dx_j} b_{ijk}}{b_{ijk}^2 c_{jkl}} \\ &- \frac{\left( -a_{ijkl} \frac{d}{dz_i} b_{ijk} + b_{ijk} \frac{d}{dz_i} a_{ijkl} \right) \frac{d}{dx_j} c_{jkl}}{b_{ijk}^2 c_{jkl}^2} \\ &- \frac{2 \left( -a_{ijkl} \frac{d}{dz_i} b_{ijk} + b_{ijk} \frac{d}{dz_i} a_{ijkl} \right) \frac{d}{dx_j} b_{ijk}}{b_{ijk}^3 c_{jkl}} \end{aligned} \quad (354)$$

$$\begin{aligned} \frac{d^2}{dy_j dz_i} \cos \theta_{ijkl} &= \frac{-a_{ijkl} \frac{d^2}{dz_i dy_j} b_{ijk} + b_{ijk} \frac{d^2}{dz_i dy_j} a_{ijkl} - \frac{d}{dy_j} a_{ijkl} \frac{d}{dz_i} b_{ijk} + \frac{d}{dz_i} a_{ijkl} \frac{d}{dy_j} b_{ijk}}{b_{ijk}^2 c_{jkl}} \\ &- \frac{\left( -a_{ijkl} \frac{d}{dz_i} b_{ijk} + b_{ijk} \frac{d}{dz_i} a_{ijkl} \right) \frac{d}{dy_j} c_{jkl}}{b_{ijk}^2 c_{jkl}^2} \\ &- \frac{2 \left( -a_{ijkl} \frac{d}{dz_i} b_{ijk} + b_{ijk} \frac{d}{dz_i} a_{ijkl} \right) \frac{d}{dy_j} b_{ijk}}{b_{ijk}^3 c_{jkl}} \end{aligned} \quad (355)$$

$$\begin{aligned} \frac{d^2}{dz_j dz_i} \cos \theta_{ijkl} &= \frac{-a_{ijkl} \frac{d^2}{dz_j dz_i} b_{ijk} + b_{ijk} \frac{d^2}{dz_j dz_i} a_{ijkl} + \frac{d}{dz_i} a_{ijkl} \frac{d}{dz_j} b_{ijk} - \frac{d}{dz_j} a_{ijkl} \frac{d}{dz_i} b_{ijk}}{b_{ijk}^2 c_{jkl}} \\ &- \frac{\left( -a_{ijkl} \frac{d}{dz_i} b_{ijk} + b_{ijk} \frac{d}{dz_i} a_{ijkl} \right) \frac{d}{dz_j} c_{jkl}}{b_{ijk}^2 c_{jkl}^2} \\ &- \frac{2 \left( -a_{ijkl} \frac{d}{dz_i} b_{ijk} + b_{ijk} \frac{d}{dz_i} a_{ijkl} \right) \frac{d}{dz_j} b_{ijk}}{b_{ijk}^3 c_{jkl}} \end{aligned} \quad (356)$$

$$\frac{d^2}{dx_k dz_i} \cos \theta_{ijkl} = \frac{-a_{ijkl} \frac{d^2}{dz_i dx_k} b_{ijk} + b_{ijk} \frac{d^2}{dz_i dx_k} a_{ijkl} - \frac{d}{dx_k} a_{ijkl} \frac{d}{dz_i} b_{ijk} + \frac{d}{dz_i} a_{ijkl} \frac{d}{dx_k} b_{ijk}}{b_{ijk}^2 c_{jkl}} \quad (357)$$

$$- \frac{\left(-a_{ijkl} \frac{d}{dz_i} b_{ijk} + b_{ijk} \frac{d}{dz_i} a_{ijkl}\right) \frac{d}{dx_k} c_{jkl}}{b_{ijk}^2 c_{jkl}^2}$$

$$- \frac{2 \left(-a_{ijkl} \frac{d}{dz_i} b_{ijk} + b_{ijk} \frac{d}{dz_i} a_{ijkl}\right) \frac{d}{dx_k} b_{ijk}}{b_{ijk}^3 c_{jkl}}$$

$$\frac{d^2}{dy_k dz_i} \cos \theta_{ijkl} = \frac{-a_{ijkl} \frac{d^2}{dz_i dy_k} b_{ijk} + b_{ijk} \frac{d^2}{dz_i dy_k} a_{ijkl} - \frac{d}{dy_k} a_{ijkl} \frac{d}{dz_i} b_{ijk} + \frac{d}{dz_i} a_{ijkl} \frac{d}{dy_k} b_{ijk}}{b_{ijk}^2 c_{jkl}} \quad (358)$$

$$- \frac{\left(-a_{ijkl} \frac{d}{dz_i} b_{ijk} + b_{ijk} \frac{d}{dz_i} a_{ijkl}\right) \frac{d}{dy_k} c_{jkl}}{b_{ijk}^2 c_{jkl}^2}$$

$$- \frac{2 \left(-a_{ijkl} \frac{d}{dz_i} b_{ijk} + b_{ijk} \frac{d}{dz_i} a_{ijkl}\right) \frac{d}{dy_k} b_{ijk}}{b_{ijk}^3 c_{jkl}}$$

$$\frac{d^2}{dz_k dz_i} \cos \theta_{ijkl} = \frac{-a_{ijkl} \frac{d^2}{dz_k dz_i} b_{ijk} + b_{ijk} \frac{d^2}{dz_k dz_i} a_{ijkl} + \frac{d}{dz_i} a_{ijkl} \frac{d}{dz_k} b_{ijk} - \frac{d}{dz_k} a_{ijkl} \frac{d}{dz_i} b_{ijk}}{b_{ijk}^2 c_{jkl}} \quad (359)$$

$$- \frac{\left(-a_{ijkl} \frac{d}{dz_i} b_{ijk} + b_{ijk} \frac{d}{dz_i} a_{ijkl}\right) \frac{d}{dz_k} c_{jkl}}{b_{ijk}^2 c_{jkl}^2}$$

$$- \frac{2 \left(-a_{ijkl} \frac{d}{dz_i} b_{ijk} + b_{ijk} \frac{d}{dz_i} a_{ijkl}\right) \frac{d}{dz_k} b_{ijk}}{b_{ijk}^3 c_{jkl}}$$

$$\frac{d^2}{dx_l dz_i} \cos \theta_{ijkl} = \frac{b_{ijk} \frac{d^2}{dz_i dx_l} a_{ijkl} - \frac{d}{dx_l} a_{ijkl} \frac{d}{dz_i} b_{ijk}}{b_{ijk}^2 c_{jkl}} - \frac{\left(-a_{ijkl} \frac{d}{dz_i} b_{ijk} + b_{ijk} \frac{d}{dz_i} a_{ijkl}\right) \frac{d}{dx_l} c_{jkl}}{b_{ijk}^2 c_{jkl}^2} \quad (360)$$

$$\frac{d^2}{dy_l dz_i} \cos \theta_{ijkl} = \frac{b_{ijk} \frac{d^2}{dz_i dy_l} a_{ijkl} - \frac{d}{dy_l} a_{ijkl} \frac{d}{dz_i} b_{ijk}}{b_{ijk}^2 c_{jkl}} - \frac{\left(-a_{ijkl} \frac{d}{dz_i} b_{ijk} + b_{ijk} \frac{d}{dz_i} a_{ijkl}\right) \frac{d}{dy_l} c_{jkl}}{b_{ijk}^2 c_{jkl}^2} \quad (361)$$

$$\frac{d^2}{dz_l dz_i} \cos \theta_{ijkl} = \frac{b_{ijk} \frac{d^2}{dz_l dz_i} a_{ijkl} - \frac{d}{dz_l} a_{ijkl} \frac{d}{dz_i} b_{ijk}}{b_{ijk}^2 c_{jkl}} - \frac{\left(-a_{ijkl} \frac{d}{dz_i} b_{ijk} + b_{ijk} \frac{d}{dz_i} a_{ijkl}\right) \frac{d}{dz_l} c_{jkl}}{b_{ijk}^2 c_{jkl}^2} \quad (362)$$

$$\begin{aligned} \frac{d^2}{dx_j^2} \cos \theta_{ijkl} &= \frac{-a_{ijkl}b_{ijk} \frac{d^2}{dx_j^2} c_{jkl} - a_{ijkl}c_{jkl} \frac{d^2}{dx_j^2} b_{ijk} - 2a_{ijkl} \frac{d}{dx_j} b_{ijk} \frac{d}{dx_j} c_{jkl} + b_{ijk}c_{jkl} \frac{d^2}{dx_j^2} a_{ijkl}}{b_{ijk}^2 c_{jkl}^2} \\ &- \frac{2 \left( -a_{ijkl}b_{ijk} \frac{d}{dx_j} c_{jkl} - a_{ijkl}c_{jkl} \frac{d}{dx_j} b_{ijk} + b_{ijk}c_{jkl} \frac{d}{dx_j} a_{ijkl} \right) \frac{d}{dx_j} c_{jkl}}{b_{ijk}^2 c_{jkl}^3} \\ &- \frac{2 \left( -a_{ijkl}b_{ijk} \frac{d}{dx_j} c_{jkl} - a_{ijkl}c_{jkl} \frac{d}{dx_j} b_{ijk} + b_{ijk}c_{jkl} \frac{d}{dx_j} a_{ijkl} \right) \frac{d}{dx_j} b_{ijk}}{b_{ijk}^3 c_{jkl}^2} \end{aligned} \quad (363)$$

$$\begin{aligned} \frac{d^2}{dy_j dx_j} \cos \theta_{ijkl} &= \frac{-a_{ijkl}b_{ijk} \frac{d^2}{dy_j dx_j} c_{jkl} - a_{ijkl}c_{jkl} \frac{d^2}{dy_j dx_j} b_{ijk} - a_{ijkl} \frac{d}{dx_j} b_{ijk} \frac{d}{dy_j} c_{jkl} - a_{ijkl} \frac{d}{dy_j} b_{ijk} \frac{d}{dx_j} c_{jkl} + b_{ijk}c_{jkl} \frac{d^2}{dy_j dx_j} a_{ijkl}}{b_{ijk}^2 c_{jkl}^2} \\ &+ \frac{b_{ijk} \frac{d}{dx_j} a_{ijkl} \frac{d}{dy_j} c_{jkl} - b_{ijk} \frac{d}{dy_j} a_{ijkl} \frac{d}{dx_j} c_{jkl} + c_{jkl} \frac{d}{dx_j} a_{ijkl} \frac{d}{dy_j} b_{ijk} - c_{jkl} \frac{d}{dy_j} a_{ijkl} \frac{d}{dx_j} b_{ijk}}{b_{ijk}^2 c_{jkl}^2} \\ &- \frac{2 \left( -a_{ijkl}b_{ijk} \frac{d}{dx_j} c_{jkl} - a_{ijkl}c_{jkl} \frac{d}{dx_j} b_{ijk} + b_{ijk}c_{jkl} \frac{d}{dx_j} a_{ijkl} \right) \frac{d}{dy_j} c_{jkl}}{b_{ijk}^2 c_{jkl}^3} - \frac{2 \left( -a_{ijkl}b_{ijk} \frac{d}{dx_j} c_{jkl} - a_{ijkl}c_{jkl} \frac{d}{dx_j} b_{ijk} + b_{ijk}c_{jkl} \frac{d}{dx_j} a_{ijkl} \right) \frac{d}{dy_j} b_{ijk}}{b_{ijk}^3 c_{jkl}^2} \end{aligned} \quad (364)$$

$$\begin{aligned} \frac{d^2}{dz_j dx_j} \cos \theta_{ijkl} &= \frac{-a_{ijkl}b_{ijk} \frac{d^2}{dz_j dx_j} c_{jkl} - a_{ijkl}c_{jkl} \frac{d^2}{dz_j dx_j} b_{ijk} - a_{ijkl} \frac{d}{dx_j} b_{ijk} \frac{d}{dz_j} c_{jkl} - a_{ijkl} \frac{d}{dz_j} b_{ijk} \frac{d}{dx_j} c_{jkl} + b_{ijk}c_{jkl} \frac{d^2}{dz_j dx_j} a_{ijkl}}{b_{ijk}^2 c_{jkl}^2} \\ &+ \frac{b_{ijk} \frac{d}{dx_j} a_{ijkl} \frac{d}{dz_j} c_{jkl} - b_{ijk} \frac{d}{dz_j} a_{ijkl} \frac{d}{dx_j} c_{jkl} + c_{jkl} \frac{d}{dx_j} a_{ijkl} \frac{d}{dz_j} b_{ijk} - c_{jkl} \frac{d}{dz_j} a_{ijkl} \frac{d}{dx_j} b_{ijk}}{b_{ijk}^2 c_{jkl}^2} \\ &- \frac{2 \left( -a_{ijkl}b_{ijk} \frac{d}{dx_j} c_{jkl} - a_{ijkl}c_{jkl} \frac{d}{dx_j} b_{ijk} + b_{ijk}c_{jkl} \frac{d}{dx_j} a_{ijkl} \right) \frac{d}{dz_j} c_{jkl}}{b_{ijk}^2 c_{jkl}^3} - \frac{2 \left( -a_{ijkl}b_{ijk} \frac{d}{dx_j} c_{jkl} - a_{ijkl}c_{jkl} \frac{d}{dx_j} b_{ijk} + b_{ijk}c_{jkl} \frac{d}{dx_j} a_{ijkl} \right) \frac{d}{dz_j} b_{ijk}}{b_{ijk}^3 c_{jkl}^2} \end{aligned} \quad (365)$$

$$\begin{aligned} \frac{d^2}{dx_k dx_j} \cos \theta_{ijkl} &= \frac{-a_{ijkl}b_{ijk} \frac{d^2}{dx_k dx_j} c_{jkl} - a_{ijkl}c_{jkl} \frac{d^2}{dx_k dx_j} b_{ijk} - a_{ijkl} \frac{d}{dx_j} b_{ijk} \frac{d}{dx_k} c_{jkl} - a_{ijkl} \frac{d}{dx_k} b_{ijk} \frac{d}{dx_j} c_{jkl} + b_{ijk}c_{jkl} \frac{d^2}{dx_k dx_j} a_{ijkl}}{b_{ijk}^2 c_{jkl}^2} \\ &+ \frac{b_{ijk} \frac{d}{dx_j} a_{ijkl} \frac{d}{dx_k} c_{jkl} - b_{ijk} \frac{d}{dx_k} a_{ijkl} \frac{d}{dx_j} c_{jkl} + c_{jkl} \frac{d}{dx_j} a_{ijkl} \frac{d}{dx_k} b_{ijk} - c_{jkl} \frac{d}{dx_k} a_{ijkl} \frac{d}{dx_j} b_{ijk}}{b_{ijk}^2 c_{jkl}^2} \\ &- \frac{2 \left( -a_{ijkl}b_{ijk} \frac{d}{dx_j} c_{jkl} - a_{ijkl}c_{jkl} \frac{d}{dx_j} b_{ijk} + b_{ijk}c_{jkl} \frac{d}{dx_j} a_{ijkl} \right) \frac{d}{dx_k} c_{jkl}}{b_{ijk}^2 c_{jkl}^3} - \frac{2 \left( -a_{ijkl}b_{ijk} \frac{d}{dx_j} c_{jkl} - a_{ijkl}c_{jkl} \frac{d}{dx_j} b_{ijk} + b_{ijk}c_{jkl} \frac{d}{dx_j} a_{ijkl} \right) \frac{d}{dx_k} b_{ijk}}{b_{ijk}^3 c_{jkl}^2} \end{aligned} \quad (366)$$

$$\begin{aligned} \frac{d^2}{dy_k dx_j} \cos \theta_{ijkl} = & \frac{-a_{ijkl} b_{ijk} \frac{d^2}{dy_k dx_j} c_{jkl} - a_{ijkl} c_{jkl} \frac{d^2}{dy_k dx_j} b_{ijk} - a_{ijkl} \frac{d}{dx_j} b_{ijk} \frac{d}{dy_k} c_{jkl} - a_{ijkl} \frac{d}{dy_k} b_{ijk} \frac{d}{dx_j} c_{jkl} + b_{ijk} c_{jkl} \frac{d^2}{dy_k dx_j} a_{ijkl}}{b_{ijk}^2 c_{jkl}^2} \\ & + \frac{b_{ijk} \frac{d}{dx_j} a_{ijkl} \frac{d}{dy_k} c_{jkl} - b_{ijk} \frac{d}{dy_k} a_{ijkl} \frac{d}{dx_j} c_{jkl} + c_{jkl} \frac{d}{dx_j} a_{ijkl} \frac{d}{dy_k} b_{ijk} - c_{jkl} \frac{d}{dy_k} a_{ijkl} \frac{d}{dx_j} b_{ijk}}{b_{ijk}^2 c_{jkl}^2} \\ & - \frac{2 \left( -a_{ijkl} b_{ijk} \frac{d}{dx_j} c_{jkl} - a_{ijkl} c_{jkl} \frac{d}{dx_j} b_{ijk} + b_{ijk} c_{jkl} \frac{d}{dx_j} a_{ijkl} \right) \frac{d}{dy_k} c_{jkl}}{b_{ijk}^2 c_{jkl}^3} - \frac{2 \left( -a_{ijkl} b_{ijk} \frac{d}{dx_j} c_{jkl} - a_{ijkl} c_{jkl} \frac{d}{dx_j} b_{ijk} + b_{ijk} c_{jkl} \frac{d}{dx_j} a_{ijkl} \right) \frac{d}{dy_k} b_{ijk}}{b_{ijk}^3 c_{jkl}^2} \end{aligned} \quad (367)$$

$$\begin{aligned} \frac{d^2}{dz_k dx_j} \cos \theta_{ijkl} = & \frac{-a_{ijkl} b_{ijk} \frac{d^2}{dz_k dx_j} c_{jkl} - a_{ijkl} c_{jkl} \frac{d^2}{dz_k dx_j} b_{ijk} - a_{ijkl} \frac{d}{dx_j} b_{ijk} \frac{d}{dz_k} c_{jkl} - a_{ijkl} \frac{d}{dz_k} b_{ijk} \frac{d}{dx_j} c_{jkl} + b_{ijk} c_{jkl} \frac{d^2}{dz_k dx_j} a_{ijkl}}{b_{ijk}^2 c_{jkl}^2} \\ & + \frac{b_{ijk} \frac{d}{dx_j} a_{ijkl} \frac{d}{dz_k} c_{jkl} - b_{ijk} \frac{d}{dz_k} a_{ijkl} \frac{d}{dx_j} c_{jkl} + c_{jkl} \frac{d}{dx_j} a_{ijkl} \frac{d}{dz_k} b_{ijk} - c_{jkl} \frac{d}{dz_k} a_{ijkl} \frac{d}{dx_j} b_{ijk}}{b_{ijk}^2 c_{jkl}^2} \\ & - \frac{2 \left( -a_{ijkl} b_{ijk} \frac{d}{dx_j} c_{jkl} - a_{ijkl} c_{jkl} \frac{d}{dx_j} b_{ijk} + b_{ijk} c_{jkl} \frac{d}{dx_j} a_{ijkl} \right) \frac{d}{dz_k} c_{jkl}}{b_{ijk}^2 c_{jkl}^3} - \frac{2 \left( -a_{ijkl} b_{ijk} \frac{d}{dx_j} c_{jkl} - a_{ijkl} c_{jkl} \frac{d}{dx_j} b_{ijk} + b_{ijk} c_{jkl} \frac{d}{dx_j} a_{ijkl} \right) \frac{d}{dz_k} b_{ijk}}{b_{ijk}^3 c_{jkl}^2} \end{aligned} \quad (368)$$

$$\begin{aligned} \frac{d^2}{dx_l dx_j} \cos \theta_{ijkl} = & \frac{-a_{ijkl} b_{ijk} \frac{d^2}{dx_l dx_j} c_{jkl} - a_{ijkl} \frac{d}{dx_j} b_{ijk} \frac{d}{dx_l} c_{jkl} + b_{ijk} c_{jkl} \frac{d^2}{dx_l dx_j} a_{ijkl} + b_{ijk} \frac{d}{dx_j} a_{ijkl} \frac{d}{dx_l} c_{jkl} - b_{ijk} \frac{d}{dx_l} a_{ijkl} \frac{d}{dx_j} c_{jkl} - c_{jkl} \frac{d}{dx_l} a_{ijkl} \frac{d}{dx_j} b_{ijk}}{b_{ijk}^2 c_{jkl}^2} \\ & - \frac{2 \left( -a_{ijkl} b_{ijk} \frac{d}{dx_j} c_{jkl} - a_{ijkl} c_{jkl} \frac{d}{dx_j} b_{ijk} + b_{ijk} c_{jkl} \frac{d}{dx_j} a_{ijkl} \right) \frac{d}{dx_l} c_{jkl}}{b_{ijk}^2 c_{jkl}^3} \end{aligned} \quad (369)$$

$$\begin{aligned} \frac{d^2}{dy_l dx_j} \cos \theta_{ijkl} = & \frac{-a_{ijkl} b_{ijk} \frac{d^2}{dy_l dx_j} c_{jkl} - a_{ijkl} \frac{d}{dx_j} b_{ijk} \frac{d}{dy_l} c_{jkl} + b_{ijk} c_{jkl} \frac{d^2}{dy_l dx_j} a_{ijkl} + b_{ijk} \frac{d}{dx_j} a_{ijkl} \frac{d}{dy_l} c_{jkl} - b_{ijk} \frac{d}{dy_l} a_{ijkl} \frac{d}{dx_j} c_{jkl} - c_{jkl} \frac{d}{dy_l} a_{ijkl} \frac{d}{dx_j} b_{ijk}}{b_{ijk}^2 c_{jkl}^2} \\ & - \frac{2 \left( -a_{ijkl} b_{ijk} \frac{d}{dx_j} c_{jkl} - a_{ijkl} c_{jkl} \frac{d}{dx_j} b_{ijk} + b_{ijk} c_{jkl} \frac{d}{dx_j} a_{ijkl} \right) \frac{d}{dy_l} c_{jkl}}{b_{ijk}^2 c_{jkl}^3} \end{aligned} \quad (370)$$

$$\begin{aligned} \frac{d^2}{dz_l dx_j} \cos \theta_{ijkl} = & \frac{-a_{ijkl} b_{ijk} \frac{d^2}{dz_l dx_j} c_{jkl} - a_{ijkl} \frac{d}{dx_j} b_{ijk} \frac{d}{dz_l} c_{jkl} + b_{ijk} c_{jkl} \frac{d^2}{dz_l dx_j} a_{ijkl} + b_{ijk} \frac{d}{dx_j} a_{ijkl} \frac{d}{dz_l} c_{jkl} - b_{ijk} \frac{d}{dz_l} a_{ijkl} \frac{d}{dx_j} c_{jkl} - c_{jkl} \frac{d}{dz_l} a_{ijkl} \frac{d}{dx_j} b_{ijk}}{b_{ijk}^2 c_{jkl}^2} \\ & - \frac{2 \left( -a_{ijkl} b_{ijk} \frac{d}{dx_j} c_{jkl} - a_{ijkl} c_{jkl} \frac{d}{dx_j} b_{ijk} + b_{ijk} c_{jkl} \frac{d}{dx_j} a_{ijkl} \right) \frac{d}{dz_l} c_{jkl}}{b_{ijk}^2 c_{jkl}^3} \end{aligned} \quad (371)$$

$$\frac{d^2}{dy_j^2} \cos \theta_{ijkl} = \frac{-a_{ijkl} b_{ijk} \frac{d^2}{dy_j^2} c_{jkl} - a_{ijkl} c_{jkl} \frac{d^2}{dy_j^2} b_{ijk} - 2a_{ijkl} \frac{d}{dy_j} b_{ijk} \frac{d}{dy_j} c_{jkl} + b_{ijk} c_{jkl} \frac{d^2}{dy_j^2} a_{ijkl}}{b_{ijk}^2 c_{jkl}^2} \quad (372)$$

$$- \frac{2 \left( -a_{ijkl} b_{ijk} \frac{d}{dy_j} c_{jkl} - a_{ijkl} c_{jkl} \frac{d}{dy_j} b_{ijk} + b_{ijk} c_{jkl} \frac{d}{dy_j} a_{ijkl} \right) \frac{d}{dy_j} c_{jkl}}{b_{ijk}^2 c_{jkl}^3} - \frac{2 \left( -a_{ijkl} b_{ijk} \frac{d}{dy_j} c_{jkl} - a_{ijkl} c_{jkl} \frac{d}{dy_j} b_{ijk} + b_{ijk} c_{jkl} \frac{d}{dy_j} a_{ijkl} \right) \frac{d}{dy_j} b_{ijk}}{b_{ijk}^3 c_{jkl}^2}$$

$$\frac{d^2}{dz_j dy_j} \cos \theta_{ijkl} = \frac{-a_{ijkl} b_{ijk} \frac{d^2}{dz_j dy_j} c_{jkl} - a_{ijkl} c_{jkl} \frac{d^2}{dz_j dy_j} b_{ijk} - a_{ijkl} \frac{d}{dy_j} b_{ijk} \frac{d}{dz_j} c_{jkl} - a_{ijkl} \frac{d}{dz_j} b_{ijk} \frac{d}{dy_j} c_{jkl}}{b_{ijk}^2 c_{jkl}^2} \quad (373)$$

$$+ \frac{b_{ijk} c_{jkl} \frac{d^2}{dz_j dy_j} a_{ijkl} + b_{ijk} \frac{d}{dy_j} a_{ijkl} \frac{d}{dz_j} c_{jkl} - b_{ijk} \frac{d}{dz_j} a_{ijkl} \frac{d}{dy_j} c_{jkl} + c_{jkl} \frac{d}{dy_j} a_{ijkl} \frac{d}{dz_j} b_{ijk} - c_{jkl} \frac{d}{dz_j} a_{ijkl} \frac{d}{dy_j} b_{ijk}}{b_{ijk}^2 c_{jkl}^2}$$

$$- \frac{2 \left( -a_{ijkl} b_{ijk} \frac{d}{dy_j} c_{jkl} - a_{ijkl} c_{jkl} \frac{d}{dy_j} b_{ijk} + b_{ijk} c_{jkl} \frac{d}{dy_j} a_{ijkl} \right) \frac{d}{dz_j} c_{jkl}}{b_{ijk}^2 c_{jkl}^3} - \frac{2 \left( -a_{ijkl} b_{ijk} \frac{d}{dy_j} c_{jkl} - a_{ijkl} c_{jkl} \frac{d}{dy_j} b_{ijk} + b_{ijk} c_{jkl} \frac{d}{dy_j} a_{ijkl} \right) \frac{d}{dz_j} b_{ijk}}{b_{ijk}^3 c_{jkl}^2}$$

$$\frac{d^2}{dx_k dy_j} \cos \theta_{ijkl} = \frac{-a_{ijkl} b_{ijk} \frac{d^2}{dy_j dx_k} c_{jkl} - a_{ijkl} c_{jkl} \frac{d^2}{dy_j dx_k} b_{ijk} - a_{ijkl} \frac{d}{dx_k} b_{ijk} \frac{d}{dy_j} c_{jkl} - a_{ijkl} \frac{d}{dy_j} b_{ijk} \frac{d}{dx_k} c_{jkl}}{b_{ijk}^2 c_{jkl}^2} \quad (374)$$

$$+ \frac{b_{ijk} c_{jkl} \frac{d^2}{dy_j dx_k} a_{ijkl} - b_{ijk} \frac{d}{dx_k} a_{ijkl} \frac{d}{dy_j} c_{jkl} + b_{ijk} \frac{d}{dy_j} a_{ijkl} \frac{d}{dx_k} c_{jkl} - c_{jkl} \frac{d}{dx_k} a_{ijkl} \frac{d}{dy_j} b_{ijk} + c_{jkl} \frac{d}{dy_j} a_{ijkl} \frac{d}{dx_k} b_{ijk}}{b_{ijk}^2 c_{jkl}^2}$$

$$- \frac{2 \left( -a_{ijkl} b_{ijk} \frac{d}{dy_j} c_{jkl} - a_{ijkl} c_{jkl} \frac{d}{dy_j} b_{ijk} + b_{ijk} c_{jkl} \frac{d}{dy_j} a_{ijkl} \right) \frac{d}{dx_k} c_{jkl}}{b_{ijk}^2 c_{jkl}^3} - \frac{2 \left( -a_{ijkl} b_{ijk} \frac{d}{dy_j} c_{jkl} - a_{ijkl} c_{jkl} \frac{d}{dy_j} b_{ijk} + b_{ijk} c_{jkl} \frac{d}{dy_j} a_{ijkl} \right) \frac{d}{dx_k} b_{ijk}}{b_{ijk}^3 c_{jkl}^2}$$

$$\frac{d^2}{dy_k dy_j} \cos \theta_{ijkl} = \frac{-a_{ijkl} b_{ijk} \frac{d^2}{dy_k dy_j} c_{jkl} - a_{ijkl} c_{jkl} \frac{d^2}{dy_k dy_j} b_{ijk} - a_{ijkl} \frac{d}{dy_j} b_{ijk} \frac{d}{dy_k} c_{jkl} - a_{ijkl} \frac{d}{dy_k} b_{ijk} \frac{d}{dy_j} c_{jkl}}{b_{ijk}^2 c_{jkl}^2} \quad (375)$$

$$+ \frac{b_{ijk} c_{jkl} \frac{d^2}{dy_k dy_j} a_{ijkl} + b_{ijk} \frac{d}{dy_j} a_{ijkl} \frac{d}{dy_k} c_{jkl} - b_{ijk} \frac{d}{dy_k} a_{ijkl} \frac{d}{dy_j} c_{jkl} + c_{jkl} \frac{d}{dy_j} a_{ijkl} \frac{d}{dy_k} b_{ijk} - c_{jkl} \frac{d}{dy_k} a_{ijkl} \frac{d}{dy_j} b_{ijk}}{b_{ijk}^2 c_{jkl}^2}$$

$$- \frac{2 \left( -a_{ijkl} b_{ijk} \frac{d}{dy_j} c_{jkl} - a_{ijkl} c_{jkl} \frac{d}{dy_j} b_{ijk} + b_{ijk} c_{jkl} \frac{d}{dy_j} a_{ijkl} \right) \frac{d}{dy_k} c_{jkl}}{b_{ijk}^2 c_{jkl}^3} - \frac{2 \left( -a_{ijkl} b_{ijk} \frac{d}{dy_j} c_{jkl} - a_{ijkl} c_{jkl} \frac{d}{dy_j} b_{ijk} + b_{ijk} c_{jkl} \frac{d}{dy_j} a_{ijkl} \right) \frac{d}{dy_k} b_{ijk}}{b_{ijk}^3 c_{jkl}^2}$$

$$\begin{aligned} \frac{d^2}{dz_k dy_j} \cos \theta_{ijkl} = & \frac{-a_{ijkl} b_{ijk} \frac{d^2}{dz_k dy_j} c_{jkl} - a_{ijkl} c_{jkl} \frac{d^2}{dz_k dy_j} b_{ijk} - a_{ijkl} \frac{d}{dz_k} b_{ijk} \frac{d}{dy_j} c_{jkl} - a_{ijkl} \frac{d}{dz_k} b_{ijk} \frac{d}{dy_j} c_{jkl}}{b_{ijk}^2 c_{jkl}^2} \\ & + \frac{b_{ijk} c_{jkl} \frac{d^2}{dz_k dy_j} a_{ijkl} + b_{ijk} \frac{d}{dy_j} a_{ijkl} \frac{d}{dz_k} c_{jkl} - b_{ijk} \frac{d}{dz_k} a_{ijkl} \frac{d}{dy_j} c_{jkl} + c_{jkl} \frac{d}{dy_j} a_{ijkl} \frac{d}{dz_k} b_{ijk} - c_{jkl} \frac{d}{dz_k} a_{ijkl} \frac{d}{dy_j} b_{ijk}}{b_{ijk}^2 c_{jkl}^2} \\ & - \frac{2 \left( -a_{ijkl} b_{ijk} \frac{d}{dy_j} c_{jkl} - a_{ijkl} c_{jkl} \frac{d}{dy_j} b_{ijk} + b_{ijk} c_{jkl} \frac{d}{dy_j} a_{ijkl} \right) \frac{d}{dz_k} c_{jkl}}{b_{ijk}^2 c_{jkl}^3} - \frac{2 \left( -a_{ijkl} b_{ijk} \frac{d}{dy_j} c_{jkl} - a_{ijkl} c_{jkl} \frac{d}{dy_j} b_{ijk} + b_{ijk} c_{jkl} \frac{d}{dy_j} a_{ijkl} \right) \frac{d}{dz_k} b_{ijk}}{b_{ijk}^3 c_{jkl}^2} \end{aligned} \quad (376)$$

$$\begin{aligned} \frac{d^2}{dx_l dy_j} \cos \theta_{ijkl} = & \frac{-a_{ijkl} b_{ijk} \frac{d^2}{dy_j dx_l} c_{jkl} - a_{ijkl} \frac{d}{dy_j} b_{ijk} \frac{d}{dx_l} c_{jkl} + b_{ijk} c_{jkl} \frac{d^2}{dy_j dx_l} a_{ijkl} - b_{ijk} \frac{d}{dx_l} a_{ijkl} \frac{d}{dy_j} c_{jkl}}{b_{ijk}^2 c_{jkl}^2} \\ & + \frac{b_{ijk} \frac{d}{dy_j} a_{ijkl} \frac{d}{dx_l} c_{jkl} - c_{jkl} \frac{d}{dx_l} a_{ijkl} \frac{d}{dy_j} b_{ijk}}{b_{ijk}^2 c_{jkl}^2} - \frac{2 \left( -a_{ijkl} b_{ijk} \frac{d}{dy_j} c_{jkl} - a_{ijkl} c_{jkl} \frac{d}{dy_j} b_{ijk} + b_{ijk} c_{jkl} \frac{d}{dy_j} a_{ijkl} \right) \frac{d}{dx_l} c_{jkl}}{b_{ijk}^2 c_{jkl}^3} \end{aligned} \quad (377)$$

$$\begin{aligned} \frac{d^2}{dy_l dy_j} \cos \theta_{ijkl} = & \frac{-a_{ijkl} b_{ijk} \frac{d^2}{dy_l dy_j} c_{jkl} - a_{ijkl} \frac{d}{dy_j} b_{ijk} \frac{d}{dy_l} c_{jkl} + b_{ijk} c_{jkl} \frac{d^2}{dy_l dy_j} a_{ijkl} + b_{ijk} \frac{d}{dy_j} a_{ijkl} \frac{d}{dy_l} c_{jkl} - b_{ijk} \frac{d}{dy_l} a_{ijkl} \frac{d}{dy_j} c_{jkl} - c_{jkl} \frac{d}{dy_l} a_{ijkl} \frac{d}{dy_j} b_{ijk}}{b_{ijk}^2 c_{jkl}^2} \\ & - \frac{2 \left( -a_{ijkl} b_{ijk} \frac{d}{dy_j} c_{jkl} - a_{ijkl} c_{jkl} \frac{d}{dy_j} b_{ijk} + b_{ijk} c_{jkl} \frac{d}{dy_j} a_{ijkl} \right) \frac{d}{dy_l} c_{jkl}}{b_{ijk}^2 c_{jkl}^3} \end{aligned} \quad (378)$$

$$\begin{aligned} \frac{d^2}{dz_l dy_j} \cos \theta_{ijkl} = & \frac{-a_{ijkl} b_{ijk} \frac{d^2}{dz_l dy_j} c_{jkl} - a_{ijkl} \frac{d}{dy_j} b_{ijk} \frac{d}{dz_l} c_{jkl} + b_{ijk} c_{jkl} \frac{d^2}{dz_l dy_j} a_{ijkl} + b_{ijk} \frac{d}{dy_j} a_{ijkl} \frac{d}{dz_l} c_{jkl} - b_{ijk} \frac{d}{dz_l} a_{ijkl} \frac{d}{dy_j} c_{jkl} - c_{jkl} \frac{d}{dz_l} a_{ijkl} \frac{d}{dy_j} b_{ijk}}{b_{ijk}^2 c_{jkl}^2} \\ & - \frac{2 \left( -a_{ijkl} b_{ijk} \frac{d}{dy_j} c_{jkl} - a_{ijkl} c_{jkl} \frac{d}{dy_j} b_{ijk} + b_{ijk} c_{jkl} \frac{d}{dy_j} a_{ijkl} \right) \frac{d}{dz_l} c_{jkl}}{b_{ijk}^2 c_{jkl}^3} \end{aligned} \quad (379)$$

$$\begin{aligned} \frac{d^2}{dz_j^2} \cos \theta_{ijkl} = & \frac{-a_{ijkl} b_{ijk} \frac{d^2}{dz_j^2} c_{jkl} - a_{ijkl} c_{jkl} \frac{d^2}{dz_j^2} b_{ijk} - 2a_{ijkl} \frac{d}{dz_j} b_{ijk} \frac{d}{dz_j} c_{jkl} + b_{ijk} c_{jkl} \frac{d^2}{dz_j^2} a_{ijkl}}{b_{ijk}^2 c_{jkl}^2} \\ & - \frac{2 \left( -a_{ijkl} b_{ijk} \frac{d}{dz_j} c_{jkl} - a_{ijkl} c_{jkl} \frac{d}{dz_j} b_{ijk} + b_{ijk} c_{jkl} \frac{d}{dz_j} a_{ijkl} \right) \frac{d}{dz_j} c_{jkl}}{b_{ijk}^2 c_{jkl}^3} \\ & - \frac{2 \left( -a_{ijkl} b_{ijk} \frac{d}{dz_j} c_{jkl} - a_{ijkl} c_{jkl} \frac{d}{dz_j} b_{ijk} + b_{ijk} c_{jkl} \frac{d}{dz_j} a_{ijkl} \right) \frac{d}{dz_j} b_{ijk}}{b_{ijk}^3 c_{jkl}^2} \end{aligned} \quad (380)$$

$$\frac{d^2}{dx_k dz_j} \cos \theta_{ijkl} = \frac{-a_{ijkl} b_{ijk} \frac{d^2}{dz_j dx_k} c_{jkl} - a_{ijkl} c_{jkl} \frac{d^2}{dz_j dx_k} b_{ijk} - a_{ijkl} \frac{d}{dx_k} b_{ijk} \frac{d}{dz_j} c_{jkl} - a_{ijkl} \frac{d}{dz_j} b_{ijk} \frac{d}{dx_k} c_{jkl}}{b_{ijk}^2 c_{jkl}^2} \quad (381)$$

$$+ \frac{b_{ijk} c_{jkl} \frac{d^2}{dz_j dx_k} a_{ijkl} - b_{ijk} \frac{d}{dx_k} a_{ijkl} \frac{d}{dz_j} c_{jkl} + b_{ijk} \frac{d}{dz_j} a_{ijkl} \frac{d}{dx_k} c_{jkl} - c_{jkl} \frac{d}{dx_k} a_{ijkl} \frac{d}{dz_j} b_{ijk} + c_{jkl} \frac{d}{dz_j} a_{ijkl} \frac{d}{dx_k} b_{ijk}}{b_{ijk}^2 c_{jkl}^2}$$

$$- \frac{2 \left( -a_{ijkl} b_{ijk} \frac{d}{dz_j} c_{jkl} - a_{ijkl} c_{jkl} \frac{d}{dz_j} b_{ijk} + b_{ijk} c_{jkl} \frac{d}{dz_j} a_{ijkl} \right) \frac{d}{dx_k} c_{jkl}}{b_{ijk}^2 c_{jkl}^3} - \frac{2 \left( -a_{ijkl} b_{ijk} \frac{d}{dz_j} c_{jkl} - a_{ijkl} c_{jkl} \frac{d}{dz_j} b_{ijk} + b_{ijk} c_{jkl} \frac{d}{dz_j} a_{ijkl} \right) \frac{d}{dx_k} b_{ijk}}{b_{ijk}^3 c_{jkl}^2}$$

$$\frac{d^2}{dy_k dz_j} \cos \theta_{ijkl} = \frac{-a_{ijkl} b_{ijk} \frac{d^2}{dz_j dy_k} c_{jkl} - a_{ijkl} c_{jkl} \frac{d^2}{dz_j dy_k} b_{ijk} - a_{ijkl} \frac{d}{dy_k} b_{ijk} \frac{d}{dz_j} c_{jkl} - a_{ijkl} \frac{d}{dz_j} b_{ijk} \frac{d}{dy_k} c_{jkl}}{b_{ijk}^2 c_{jkl}^2} \quad (382)$$

$$+ \frac{b_{ijk} c_{jkl} \frac{d^2}{dz_j dy_k} a_{ijkl} - b_{ijk} \frac{d}{dy_k} a_{ijkl} \frac{d}{dz_j} c_{jkl} + b_{ijk} \frac{d}{dz_j} a_{ijkl} \frac{d}{dy_k} c_{jkl} - c_{jkl} \frac{d}{dy_k} a_{ijkl} \frac{d}{dz_j} b_{ijk} + c_{jkl} \frac{d}{dz_j} a_{ijkl} \frac{d}{dy_k} b_{ijk}}{b_{ijk}^2 c_{jkl}^2}$$

$$- \frac{2 \left( -a_{ijkl} b_{ijk} \frac{d}{dz_j} c_{jkl} - a_{ijkl} c_{jkl} \frac{d}{dz_j} b_{ijk} + b_{ijk} c_{jkl} \frac{d}{dz_j} a_{ijkl} \right) \frac{d}{dy_k} c_{jkl}}{b_{ijk}^2 c_{jkl}^3} - \frac{2 \left( -a_{ijkl} b_{ijk} \frac{d}{dz_j} c_{jkl} - a_{ijkl} c_{jkl} \frac{d}{dz_j} b_{ijk} + b_{ijk} c_{jkl} \frac{d}{dz_j} a_{ijkl} \right) \frac{d}{dy_k} b_{ijk}}{b_{ijk}^3 c_{jkl}^2}$$

$$\frac{d^2}{dz_k dz_j} \cos \theta_{ijkl} = \frac{-a_{ijkl} b_{ijk} \frac{d^2}{dz_k dz_j} c_{jkl} - a_{ijkl} c_{jkl} \frac{d^2}{dz_k dz_j} b_{ijk} - a_{ijkl} \frac{d}{dz_j} b_{ijk} \frac{d}{dz_k} c_{jkl} - a_{ijkl} \frac{d}{dz_k} b_{ijk} \frac{d}{dz_j} c_{jkl}}{b_{ijk}^2 c_{jkl}^2} \quad (383)$$

$$+ \frac{b_{ijk} c_{jkl} \frac{d^2}{dz_k dz_j} a_{ijkl} + b_{ijk} \frac{d}{dz_j} a_{ijkl} \frac{d}{dz_k} c_{jkl} - b_{ijk} \frac{d}{dz_k} a_{ijkl} \frac{d}{dz_j} c_{jkl} + c_{jkl} \frac{d}{dz_j} a_{ijkl} \frac{d}{dz_k} b_{ijk} - c_{jkl} \frac{d}{dz_k} a_{ijkl} \frac{d}{dz_j} b_{ijk}}{b_{ijk}^2 c_{jkl}^2}$$

$$- \frac{2 \left( -a_{ijkl} b_{ijk} \frac{d}{dz_j} c_{jkl} - a_{ijkl} c_{jkl} \frac{d}{dz_j} b_{ijk} + b_{ijk} c_{jkl} \frac{d}{dz_j} a_{ijkl} \right) \frac{d}{dz_k} c_{jkl}}{b_{ijk}^2 c_{jkl}^3} - \frac{2 \left( -a_{ijkl} b_{ijk} \frac{d}{dz_j} c_{jkl} - a_{ijkl} c_{jkl} \frac{d}{dz_j} b_{ijk} + b_{ijk} c_{jkl} \frac{d}{dz_j} a_{ijkl} \right) \frac{d}{dz_k} b_{ijk}}{b_{ijk}^3 c_{jkl}^2}$$

$$\frac{d^2}{dx_l dz_j} \cos \theta_{ijkl} = \frac{-a_{ijkl} b_{ijk} \frac{d^2}{dz_j dx_l} c_{jkl} - a_{ijkl} \frac{d}{dz_j} b_{ijk} \frac{d}{dx_l} c_{jkl} + b_{ijk} c_{jkl} \frac{d^2}{dz_j dx_l} a_{ijkl} - b_{ijk} \frac{d}{dx_l} a_{ijkl} \frac{d}{dz_j} c_{jkl}}{b_{ijk}^2 c_{jkl}^2} \quad (384)$$

$$+ \frac{b_{ijk} \frac{d}{dz_j} a_{ijkl} \frac{d}{dx_l} c_{jkl} - c_{jkl} \frac{d}{dx_l} a_{ijkl} \frac{d}{dz_j} b_{ijk}}{b_{ijk}^2 c_{jkl}^2} - \frac{2 \left( -a_{ijkl} b_{ijk} \frac{d}{dz_j} c_{jkl} - a_{ijkl} c_{jkl} \frac{d}{dz_j} b_{ijk} + b_{ijk} c_{jkl} \frac{d}{dz_j} a_{ijkl} \right) \frac{d}{dx_l} c_{jkl}}{b_{ijk}^2 c_{jkl}^3}$$

$$\frac{d^2}{dy_l dz_j} \cos \theta_{ijkl} = \frac{-a_{ijkl} b_{ijk} \frac{d^2}{dz_j dy_l} c_{jkl} - a_{ijkl} \frac{d}{dz_j} b_{ijk} \frac{d}{dy_l} c_{jkl} + b_{ijk} c_{jkl} \frac{d^2}{dz_j dy_l} a_{ijkl} - b_{ijk} \frac{d}{dy_l} a_{ijkl} \frac{d}{dz_j} c_{jkl}}{b_{ijk}^2 c_{jkl}^2} \quad (385)$$

$$+ \frac{b_{ijk} \frac{d}{dz_j} a_{ijkl} \frac{d}{dy_l} c_{jkl} - c_{jkl} \frac{d}{dy_l} a_{ijkl} \frac{d}{dz_j} b_{ijk}}{b_{ijk}^2 c_{jkl}^2} - \frac{2 \left( -a_{ijkl} b_{ijk} \frac{d}{dz_j} c_{jkl} - a_{ijkl} c_{jkl} \frac{d}{dz_j} b_{ijk} + b_{ijk} c_{jkl} \frac{d}{dz_j} a_{ijkl} \right) \frac{d}{dy_l} c_{jkl}}{b_{ijk}^2 c_{jkl}^3}$$



$$\frac{d^2}{dz_l dz_j} \cos \theta_{ijkl} = \frac{-a_{ijkl} b_{ijk} \frac{d^2}{dz_l dz_j} c_{jkl} - a_{ijkl} \frac{d}{dz_j} b_{ijk} \frac{d}{dz_l} c_{jkl} + b_{ijk} c_{jkl} \frac{d^2}{dz_l dz_j} a_{ijkl} + b_{ijk} \frac{d}{dz_j} a_{ijkl} \frac{d}{dz_l} c_{jkl} - b_{ijk} \frac{d}{dz_l} a_{ijkl} \frac{d}{dz_j} c_{jkl} - c_{jkl} \frac{d}{dz_l} a_{ijkl} \frac{d}{dz_j} b_{ijk}}{b_{ijk}^2 c_{jkl}^2} \quad (386)$$

$$- \frac{2 \left( -a_{ijkl} b_{ijk} \frac{d}{dz_j} c_{jkl} - a_{ijkl} c_{jkl} \frac{d}{dz_j} b_{ijk} + b_{ijk} c_{jkl} \frac{d}{dz_j} a_{ijkl} \right) \frac{d}{dz_l} c_{jkl}}{b_{ijk}^2 c_{jkl}^3}$$

$$\frac{d^2}{dx_k^2} \cos \theta_{ijkl} = \frac{-a_{ijkl} b_{ijk} \frac{d^2}{dx_k^2} c_{jkl} - a_{ijkl} c_{jkl} \frac{d^2}{dx_k^2} b_{ijk} - 2a_{ijkl} \frac{d}{dx_k} b_{ijk} \frac{d}{dx_k} c_{jkl} + b_{ijk} c_{jkl} \frac{d^2}{dx_k^2} a_{ijkl}}{b_{ijk}^2 c_{jkl}^2} \quad (387)$$

$$- \frac{2 \left( -a_{ijkl} b_{ijk} \frac{d}{dx_k} c_{jkl} - a_{ijkl} c_{jkl} \frac{d}{dx_k} b_{ijk} + b_{ijk} c_{jkl} \frac{d}{dx_k} a_{ijkl} \right) \frac{d}{dx_k} c_{jkl}}{b_{ijk}^2 c_{jkl}^3} - \frac{2 \left( -a_{ijkl} b_{ijk} \frac{d}{dx_k} c_{jkl} - a_{ijkl} c_{jkl} \frac{d}{dx_k} b_{ijk} + b_{ijk} c_{jkl} \frac{d}{dx_k} a_{ijkl} \right) \frac{d}{dx_k} b_{ijk}}{b_{ijk}^3 c_{jkl}^2}$$

$$\frac{d^2}{dy_k dx_k} \cos \theta_{ijkl} = \frac{-a_{ijkl} b_{ijk} \frac{d^2}{dy_k dx_k} c_{jkl} - a_{ijkl} c_{jkl} \frac{d^2}{dy_k dx_k} b_{ijk} - a_{ijkl} \frac{d}{dx_k} b_{ijk} \frac{d}{dy_k} c_{jkl} - a_{ijkl} \frac{d}{dy_k} b_{ijk} \frac{d}{dx_k} c_{jkl}}{b_{ijk}^2 c_{jkl}^2} \quad (388)$$

$$+ \frac{b_{ijk} c_{jkl} \frac{d^2}{dy_k dx_k} a_{ijkl} + b_{ijk} \frac{d}{dx_k} a_{ijkl} \frac{d}{dy_k} c_{jkl} - b_{ijk} \frac{d}{dy_k} a_{ijkl} \frac{d}{dx_k} c_{jkl} + c_{jkl} \frac{d}{dx_k} a_{ijkl} \frac{d}{dy_k} b_{ijk} - c_{jkl} \frac{d}{dy_k} a_{ijkl} \frac{d}{dx_k} b_{ijk}}{b_{ijk}^2 c_{jkl}^2}$$

$$- \frac{2 \left( -a_{ijkl} b_{ijk} \frac{d}{dx_k} c_{jkl} - a_{ijkl} c_{jkl} \frac{d}{dx_k} b_{ijk} + b_{ijk} c_{jkl} \frac{d}{dx_k} a_{ijkl} \right) \frac{d}{dy_k} c_{jkl}}{b_{ijk}^2 c_{jkl}^3} - \frac{2 \left( -a_{ijkl} b_{ijk} \frac{d}{dx_k} c_{jkl} - a_{ijkl} c_{jkl} \frac{d}{dx_k} b_{ijk} + b_{ijk} c_{jkl} \frac{d}{dx_k} a_{ijkl} \right) \frac{d}{dy_k} b_{ijk}}{b_{ijk}^3 c_{jkl}^2}$$

$$\frac{d^2}{dz_k dx_k} \cos \theta_{ijkl} = \frac{-a_{ijkl} b_{ijk} \frac{d^2}{dz_k dx_k} c_{jkl} - a_{ijkl} c_{jkl} \frac{d^2}{dz_k dx_k} b_{ijk} - a_{ijkl} \frac{d}{dx_k} b_{ijk} \frac{d}{dz_k} c_{jkl} - a_{ijkl} \frac{d}{dz_k} b_{ijk} \frac{d}{dx_k} c_{jkl}}{b_{ijk}^2 c_{jkl}^2} \quad (389)$$

$$+ \frac{b_{ijk} c_{jkl} \frac{d^2}{dz_k dx_k} a_{ijkl} + b_{ijk} \frac{d}{dx_k} a_{ijkl} \frac{d}{dz_k} c_{jkl} - b_{ijk} \frac{d}{dz_k} a_{ijkl} \frac{d}{dx_k} c_{jkl} + c_{jkl} \frac{d}{dx_k} a_{ijkl} \frac{d}{dz_k} b_{ijk} - c_{jkl} \frac{d}{dz_k} a_{ijkl} \frac{d}{dx_k} b_{ijk}}{b_{ijk}^2 c_{jkl}^2}$$

$$- \frac{2 \left( -a_{ijkl} b_{ijk} \frac{d}{dx_k} c_{jkl} - a_{ijkl} c_{jkl} \frac{d}{dx_k} b_{ijk} + b_{ijk} c_{jkl} \frac{d}{dx_k} a_{ijkl} \right) \frac{d}{dz_k} c_{jkl}}{b_{ijk}^2 c_{jkl}^3} - \frac{2 \left( -a_{ijkl} b_{ijk} \frac{d}{dx_k} c_{jkl} - a_{ijkl} c_{jkl} \frac{d}{dx_k} b_{ijk} + b_{ijk} c_{jkl} \frac{d}{dx_k} a_{ijkl} \right) \frac{d}{dz_k} b_{ijk}}{b_{ijk}^3 c_{jkl}^2}$$

$$\frac{d^2}{dx_l dx_k} \cos \theta_{ijkl} = \frac{-a_{ijkl} b_{ijk} \frac{d^2}{dx_l dx_k} c_{jkl} - a_{ijkl} \frac{d}{dx_k} b_{ijk} \frac{d}{dx_l} c_{jkl} + b_{ijk} c_{jkl} \frac{d^2}{dx_l dx_k} a_{ijkl} + b_{ijk} \frac{d}{dx_k} a_{ijkl} \frac{d}{dx_l} c_{jkl} - b_{ijk} \frac{d}{dx_l} a_{ijkl} \frac{d}{dx_k} c_{jkl} - c_{jkl} \frac{d}{dx_l} a_{ijkl} \frac{d}{dx_k} b_{ijk}}{b_{ijk}^2 c_{jkl}^2} \quad (390)$$

$$- \frac{2 \left( -a_{ijkl} b_{ijk} \frac{d}{dx_k} c_{jkl} - a_{ijkl} c_{jkl} \frac{d}{dx_k} b_{ijk} + b_{ijk} c_{jkl} \frac{d}{dx_k} a_{ijkl} \right) \frac{d}{dx_l} c_{jkl}}{b_{ijk}^2 c_{jkl}^3}$$

$$\frac{d^2}{dy_l dx_k} \cos \theta_{ijkl} = \frac{-a_{ijkl} b_{ijk} \frac{d^2}{dy_l dx_k} c_{jkl} - a_{ijkl} \frac{d}{dx_k} b_{ijk} \frac{d}{dy_l} c_{jkl} + b_{ijk} c_{jkl} \frac{d^2}{dy_l dx_k} a_{ijkl} + b_{ijk} \frac{d}{dx_k} a_{ijkl} \frac{d}{dy_l} c_{jkl} - b_{ijk} \frac{d}{dy_l} a_{ijkl} \frac{d}{dx_k} c_{jkl} - c_{jkl} \frac{d}{dy_l} a_{ijkl} \frac{d}{dx_k} b_{ijk}}{b_{ijk}^2 c_{jkl}^2} \quad (391)$$

$$- \frac{2 \left( -a_{ijkl} b_{ijk} \frac{d}{dx_k} c_{jkl} - a_{ijkl} c_{jkl} \frac{d}{dx_k} b_{ijk} + b_{ijk} c_{jkl} \frac{d}{dx_k} a_{ijkl} \right) \frac{d}{dy_l} c_{jkl}}{b_{ijk}^2 c_{jkl}^3}$$

$$\frac{d^2}{dz_l dx_k} \cos \theta_{ijkl} = \frac{-a_{ijkl} b_{ijk} \frac{d^2}{dz_l dx_k} c_{jkl} - a_{ijkl} \frac{d}{dx_k} b_{ijk} \frac{d}{dz_l} c_{jkl} + b_{ijk} c_{jkl} \frac{d^2}{dz_l dx_k} a_{ijkl} + b_{ijk} \frac{d}{dx_k} a_{ijkl} \frac{d}{dz_l} c_{jkl} - b_{ijk} \frac{d}{dz_l} a_{ijkl} \frac{d}{dx_k} c_{jkl} - c_{jkl} \frac{d}{dz_l} a_{ijkl} \frac{d}{dx_k} b_{ijk}}{b_{ijk}^2 c_{jkl}^2} \quad (392)$$

$$- \frac{2 \left( -a_{ijkl} b_{ijk} \frac{d}{dx_k} c_{jkl} - a_{ijkl} c_{jkl} \frac{d}{dx_k} b_{ijk} + b_{ijk} c_{jkl} \frac{d}{dx_k} a_{ijkl} \right) \frac{d}{dz_l} c_{jkl}}{b_{ijk}^2 c_{jkl}^3}$$

$$\frac{d^2}{dy_k^2} \cos \theta_{ijkl} = \frac{-a_{ijkl} b_{ijk} \frac{d^2}{dy_k^2} c_{jkl} - a_{ijkl} c_{jkl} \frac{d^2}{dy_k^2} b_{ijk} - 2a_{ijkl} \frac{d}{dy_k} b_{ijk} \frac{d}{dy_k} c_{jkl} + b_{ijk} c_{jkl} \frac{d^2}{dy_k^2} a_{ijkl}}{b_{ijk}^2 c_{jkl}^2} \quad (393)$$

$$- \frac{2 \left( -a_{ijkl} b_{ijk} \frac{d}{dy_k} c_{jkl} - a_{ijkl} c_{jkl} \frac{d}{dy_k} b_{ijk} + b_{ijk} c_{jkl} \frac{d}{dy_k} a_{ijkl} \right) \frac{d}{dy_k} c_{jkl}}{b_{ijk}^2 c_{jkl}^3} - \frac{2 \left( -a_{ijkl} b_{ijk} \frac{d}{dy_k} c_{jkl} - a_{ijkl} c_{jkl} \frac{d}{dy_k} b_{ijk} + b_{ijk} c_{jkl} \frac{d}{dy_k} a_{ijkl} \right) \frac{d}{dy_k} b_{ijk}}{b_{ijk}^3 c_{jkl}^2}$$

$$\frac{d^2}{dz_k dy_k} \cos \theta_{ijkl} = \frac{-a_{ijkl} b_{ijk} \frac{d^2}{dz_k dy_k} c_{jkl} - a_{ijkl} c_{jkl} \frac{d^2}{dz_k dy_k} b_{ijk} - a_{ijkl} \frac{d}{dy_k} b_{ijk} \frac{d}{dz_k} c_{jkl} - a_{ijkl} \frac{d}{dz_k} b_{ijk} \frac{d}{dy_k} c_{jkl}}{b_{ijk}^2 c_{jkl}^2} \quad (394)$$

$$+ \frac{b_{ijk} c_{jkl} \frac{d^2}{dz_k dy_k} a_{ijkl} + b_{ijk} \frac{d}{dy_k} a_{ijkl} \frac{d}{dz_k} c_{jkl} - b_{ijk} \frac{d}{dz_k} a_{ijkl} \frac{d}{dy_k} c_{jkl} + c_{jkl} \frac{d}{dy_k} a_{ijkl} \frac{d}{dz_k} b_{ijk} - c_{jkl} \frac{d}{dz_k} a_{ijkl} \frac{d}{dy_k} b_{ijk}}{b_{ijk}^2 c_{jkl}^2}$$

$$- \frac{2 \left( -a_{ijkl} b_{ijk} \frac{d}{dy_k} c_{jkl} - a_{ijkl} c_{jkl} \frac{d}{dy_k} b_{ijk} + b_{ijk} c_{jkl} \frac{d}{dy_k} a_{ijkl} \right) \frac{d}{dz_k} c_{jkl}}{b_{ijk}^2 c_{jkl}^3}$$

$$- \frac{2 \left( -a_{ijkl} b_{ijk} \frac{d}{dy_k} c_{jkl} - a_{ijkl} c_{jkl} \frac{d}{dy_k} b_{ijk} + b_{ijk} c_{jkl} \frac{d}{dy_k} a_{ijkl} \right) \frac{d}{dz_k} b_{ijk}}{b_{ijk}^3 c_{jkl}^2}$$

$$\frac{d^2}{dx_l dy_k} \cos \theta_{ijkl} = \frac{-a_{ijkl} b_{ijk} \frac{d^2}{dy_k dx_l} c_{jkl} - a_{ijkl} \frac{d}{dy_k} b_{ijk} \frac{d}{dx_l} c_{jkl} + b_{ijk} c_{jkl} \frac{d^2}{dy_k dx_l} a_{ijkl} - b_{ijk} \frac{d}{dx_l} a_{ijkl} \frac{d}{dy_k} c_{jkl} + b_{ijk} \frac{d}{dy_k} a_{ijkl} \frac{d}{dx_l} c_{jkl} - c_{jkl} \frac{d}{dx_l} a_{ijkl} \frac{d}{dy_k} b_{ijk}}{b_{ijk}^2 c_{jkl}^2} \quad (395)$$

$$- \frac{2 \left( -a_{ijkl} b_{ijk} \frac{d}{dy_k} c_{jkl} - a_{ijkl} c_{jkl} \frac{d}{dy_k} b_{ijk} + b_{ijk} c_{jkl} \frac{d}{dy_k} a_{ijkl} \right) \frac{d}{dx_l} c_{jkl}}{b_{ijk}^2 c_{jkl}^3}$$

$$\frac{d^2}{dy_l dy_k} \cos \theta_{ijkl} = \frac{-a_{ijkl} b_{ijk} \frac{d^2}{dy_l dy_k} c_{jkl} - a_{ijkl} \frac{d}{dy_k} b_{ijk} \frac{d}{dy_l} c_{jkl} + b_{ijk} c_{jkl} \frac{d^2}{dy_l dy_k} a_{ijkl} + b_{ijk} \frac{d}{dy_k} a_{ijkl} \frac{d}{dy_l} c_{jkl} - b_{ijk} \frac{d}{dy_l} a_{ijkl} \frac{d}{dy_k} c_{jkl} - c_{jkl} \frac{d}{dy_l} a_{ijkl} \frac{d}{dy_k} b_{ijk}}{b_{ijk}^2 c_{jkl}^2} \quad (396)$$

$$- \frac{2 \left( -a_{ijkl} b_{ijk} \frac{d}{dy_k} c_{jkl} - a_{ijkl} c_{jkl} \frac{d}{dy_k} b_{ijk} + b_{ijk} c_{jkl} \frac{d}{dy_k} a_{ijkl} \right) \frac{d}{dy_l} c_{jkl}}{b_{ijk}^2 c_{jkl}^3}$$

$$\frac{d^2}{dz_l dy_k} \cos \theta_{ijkl} = \frac{-a_{ijkl} b_{ijk} \frac{d^2}{dz_l dy_k} c_{jkl} - a_{ijkl} \frac{d}{dy_k} b_{ijk} \frac{d}{dz_l} c_{jkl} + b_{ijk} c_{jkl} \frac{d^2}{dz_l dy_k} a_{ijkl} + b_{ijk} \frac{d}{dy_k} a_{ijkl} \frac{d}{dz_l} c_{jkl} - b_{ijk} \frac{d}{dz_l} a_{ijkl} \frac{d}{dy_k} c_{jkl} - c_{jkl} \frac{d}{dz_l} a_{ijkl} \frac{d}{dy_k} b_{ijk}}{b_{ijk}^2 c_{jkl}^2} \quad (397)$$

$$- \frac{2 \left( -a_{ijkl} b_{ijk} \frac{d}{dy_k} c_{jkl} - a_{ijkl} c_{jkl} \frac{d}{dy_k} b_{ijk} + b_{ijk} c_{jkl} \frac{d}{dy_k} a_{ijkl} \right) \frac{d}{dz_l} c_{jkl}}{b_{ijk}^2 c_{jkl}^3}$$

$$\frac{d^2}{dz_k^2} \cos \theta_{ijkl} = \frac{-a_{ijkl} b_{ijk} \frac{d^2}{dz_k^2} c_{jkl} - a_{ijkl} c_{jkl} \frac{d^2}{dz_k^2} b_{ijk} - 2a_{ijkl} \frac{d}{dz_k} b_{ijk} \frac{d}{dz_k} c_{jkl} + b_{ijk} c_{jkl} \frac{d^2}{dz_k^2} a_{ijkl}}{b_{ijk}^2 c_{jkl}^2} \quad (398)$$

$$- \frac{2 \left( -a_{ijkl} b_{ijk} \frac{d}{dz_k} c_{jkl} - a_{ijkl} c_{jkl} \frac{d}{dz_k} b_{ijk} + b_{ijk} c_{jkl} \frac{d}{dz_k} a_{ijkl} \right) \frac{d}{dz_k} c_{jkl}}{b_{ijk}^2 c_{jkl}^3} - \frac{2 \left( -a_{ijkl} b_{ijk} \frac{d}{dz_k} c_{jkl} - a_{ijkl} c_{jkl} \frac{d}{dz_k} b_{ijk} + b_{ijk} c_{jkl} \frac{d}{dz_k} a_{ijkl} \right) \frac{d}{dz_k} b_{ijk}}{b_{ijk}^3 c_{jkl}^2}$$

$$\frac{d^2}{dx_l dz_k} \cos \theta_{ijkl} = \frac{-a_{ijkl} b_{ijk} \frac{d^2}{dz_k dx_l} c_{jkl} - a_{ijkl} \frac{d}{dz_k} b_{ijk} \frac{d}{dx_l} c_{jkl} + b_{ijk} c_{jkl} \frac{d^2}{dz_k dx_l} a_{ijkl} - b_{ijk} \frac{d}{dx_l} a_{ijkl} \frac{d}{dz_k} c_{jkl} + b_{ijk} \frac{d}{dz_k} a_{ijkl} \frac{d}{dx_l} c_{jkl} - c_{jkl} \frac{d}{dx_l} a_{ijkl} \frac{d}{dz_k} b_{ijk}}{b_{ijk}^2 c_{jkl}^2} \quad (399)$$

$$- \frac{2 \left( -a_{ijkl} b_{ijk} \frac{d}{dz_k} c_{jkl} - a_{ijkl} c_{jkl} \frac{d}{dz_k} b_{ijk} + b_{ijk} c_{jkl} \frac{d}{dz_k} a_{ijkl} \right) \frac{d}{dx_l} c_{jkl}}{b_{ijk}^2 c_{jkl}^3}$$

$$\frac{d^2}{dy_l dz_k} \cos \theta_{ijkl} = \frac{-a_{ijkl} b_{ijk} \frac{d^2}{dz_k dy_l} c_{jkl} - a_{ijkl} \frac{d}{dz_k} b_{ijk} \frac{d}{dy_l} c_{jkl} + b_{ijk} c_{jkl} \frac{d^2}{dz_k dy_l} a_{ijkl} - b_{ijk} \frac{d}{dy_l} a_{ijkl} \frac{d}{dz_k} c_{jkl} + b_{ijk} \frac{d}{dz_k} a_{ijkl} \frac{d}{dy_l} c_{jkl} - c_{jkl} \frac{d}{dy_l} a_{ijkl} \frac{d}{dz_k} b_{ijk}}{b_{ijk}^2 c_{jkl}^2} \quad (400)$$

$$- \frac{2 \left( -a_{ijkl} b_{ijk} \frac{d}{dz_k} c_{jkl} - a_{ijkl} c_{jkl} \frac{d}{dz_k} b_{ijk} + b_{ijk} c_{jkl} \frac{d}{dz_k} a_{ijkl} \right) \frac{d}{dy_l} c_{jkl}}{b_{ijk}^2 c_{jkl}^3}$$

$$\frac{d^2}{dz_l dz_k} \cos \theta_{ijkl} = \frac{-a_{ijkl} b_{ijk} \frac{d^2}{dz_l dz_k} c_{jkl} - a_{ijkl} \frac{d}{dz_k} b_{ijk} \frac{d}{dz_l} c_{jkl} + b_{ijk} c_{jkl} \frac{d^2}{dz_l dz_k} a_{ijkl} + b_{ijk} \frac{d}{dz_k} a_{ijkl} \frac{d}{dz_l} c_{jkl} - b_{ijk} \frac{d}{dz_l} a_{ijkl} \frac{d}{dz_k} c_{jkl} - c_{jkl} \frac{d}{dz_l} a_{ijkl} \frac{d}{dz_k} b_{ijk}}{b_{ijk}^2 c_{jkl}^2} \quad (401)$$

$$- \frac{2 \left( -a_{ijkl} b_{ijk} \frac{d}{dz_k} c_{jkl} - a_{ijkl} c_{jkl} \frac{d}{dz_k} b_{ijk} + b_{ijk} c_{jkl} \frac{d}{dz_k} a_{ijkl} \right) \frac{d}{dz_l} c_{jkl}}{b_{ijk}^2 c_{jkl}^3}$$

$$\frac{d^2}{dx_l^2} \cos \theta_{ijkl} = \frac{-a_{ijkl} \frac{d^2}{dx_l^2} c_{jkl} + c_{jkl} \frac{d^2}{dx_l^2} a_{ijkl}}{b_{ijk} c_{jkl}^2} - \frac{2 \left( -a_{ijkl} \frac{d}{dx_l} c_{jkl} + c_{jkl} \frac{d}{dx_l} a_{ijkl} \right) \frac{d}{dx_l} c_{jkl}}{b_{ijk} c_{jkl}^3} \quad (402)$$

$$\frac{d^2}{dy_l dx_l} \cos \theta_{ijkl} = \frac{-a_{ijkl} \frac{d^2}{dy_l dx_l} c_{jkl} + c_{jkl} \frac{d^2}{dy_l dx_l} a_{ijkl} + \frac{d}{dx_l} a_{ijkl} \frac{d}{dy_l} c_{jkl} - \frac{d}{dy_l} a_{ijkl} \frac{d}{dx_l} c_{jkl}}{b_{ijk} c_{jkl}^2} - \frac{2 \left( -a_{ijkl} \frac{d}{dx_l} c_{jkl} + c_{jkl} \frac{d}{dx_l} a_{ijkl} \right) \frac{d}{dy_l} c_{jkl}}{b_{ijk} c_{jkl}^3} \quad (403)$$

$$\frac{d^2}{dz_l dx_l} \cos \theta_{ijkl} = \frac{-a_{ijkl} \frac{d^2}{dz_l dx_l} c_{jkl} + c_{jkl} \frac{d^2}{dz_l dx_l} a_{ijkl} + \frac{d}{dx_l} a_{ijkl} \frac{d}{dz_l} c_{jkl} - \frac{d}{dz_l} a_{ijkl} \frac{d}{dx_l} c_{jkl}}{b_{ijk} c_{jkl}^2} - \frac{2 \left( -a_{ijkl} \frac{d}{dx_l} c_{jkl} + c_{jkl} \frac{d}{dx_l} a_{ijkl} \right) \frac{d}{dz_l} c_{jkl}}{b_{ijk} c_{jkl}^3} \quad (404)$$

$$\frac{d^2}{dy_l^2} \cos \theta_{ijkl} = \frac{-a_{ijkl} \frac{d^2}{dy_l^2} c_{jkl} + c_{jkl} \frac{d^2}{dy_l^2} a_{ijkl}}{b_{ijk} c_{jkl}^2} - \frac{2 \left( -a_{ijkl} \frac{d}{dy_l} c_{jkl} + c_{jkl} \frac{d}{dy_l} a_{ijkl} \right) \frac{d}{dy_l} c_{jkl}}{b_{ijk} c_{jkl}^3} \quad (405)$$

$$\frac{d^2}{dz_l dy_l} \cos \theta_{ijkl} = \frac{-a_{ijkl} \frac{d^2}{dz_l dy_l} c_{jkl} + c_{jkl} \frac{d^2}{dz_l dy_l} a_{ijkl} + \frac{d}{dy_l} a_{ijkl} \frac{d}{dz_l} c_{jkl} - \frac{d}{dz_l} a_{ijkl} \frac{d}{dy_l} c_{jkl}}{b_{ijk} c_{jkl}^2} - \frac{2 \left( -a_{ijkl} \frac{d}{dy_l} c_{jkl} + c_{jkl} \frac{d}{dy_l} a_{ijkl} \right) \frac{d}{dz_l} c_{jkl}}{b_{ijk} c_{jkl}^3} \quad (406)$$

$$\frac{d^2}{dz_l^2} \cos \theta_{ijkl} = \frac{-a_{ijkl} \frac{d^2}{dz_l^2} c_{jkl} + c_{jkl} \frac{d^2}{dz_l^2} a_{ijkl}}{b_{ijk} c_{jkl}^2} - \frac{2 \left( -a_{ijkl} \frac{d}{dz_l} c_{jkl} + c_{jkl} \frac{d}{dz_l} a_{ijkl} \right) \frac{d}{dz_l} c_{jkl}}{b_{ijk} c_{jkl}^3} \quad (407)$$

The derivatives of  $a_{ijkl}$  with respect to the coordinates  $x$ ,  $y$  and  $z$  of the participating atoms  $i$ ,  $j$  and  $k$  are defined in Section S1.3.3. The derivatives of  $\cos \theta_{ijkl}$  are equivalent by replacing  $a_{ijkl}$  with  $d_{ijkl}$  (see Section S1.3.4).

### S1.3.3 Derivatives of $a_{ijkl}$

The first and second order derivatives of  $a_{ijkl}$  with respect to the coordinates  $x$ ,  $y$  and  $z$  of the participating atoms  $i, j, k$  and  $l$  are:

$$\frac{d}{dx_i} a_{ijkl} = -y_{kj} (x_{kj} y_{lk} - x_{lk} y_{kj}) - z_{kj} (x_{kj} z_{lk} - x_{lk} z_{kj}) \quad (408)$$

$$\frac{d}{dy_i} a_{ijkl} = x_{kj} (x_{kj} y_{lk} - x_{lk} y_{kj}) - z_{kj} (y_{kj} z_{lk} - y_{lk} z_{kj}) \quad (409)$$

$$\frac{d}{dz_i} a_{ijkl} = x_{kj} (x_{kj} z_{lk} - x_{lk} z_{kj}) + y_{kj} (y_{kj} z_{lk} - y_{lk} z_{kj}) \quad (410)$$

$$\frac{d}{dx_j} a_{ijkl} = -y_{lk} (x_{ji} y_{kj} - x_{kj} y_{ji}) - z_{lk} (x_{ji} z_{kj} - x_{kj} z_{ji}) - (y_i - y_k) (x_{kj} y_{lk} - x_{lk} y_{kj}) - (z_i - z_k) (x_{kj} z_{lk} - x_{lk} z_{kj}) \quad (411)$$

$$\frac{d}{dy_j} a_{ijkl} = x_{lk} (x_{ji} y_{kj} - x_{kj} y_{ji}) - z_{lk} (y_{ji} z_{kj} - y_{kj} z_{ji}) + (x_i - x_k) (x_{kj} y_{lk} - x_{lk} y_{kj}) - (z_i - z_k) (y_{kj} z_{lk} - y_{lk} z_{kj}) \quad (412)$$

$$\frac{d}{dz_j} a_{ijkl} = x_{lk} (x_{ji} z_{kj} - x_{kj} z_{ji}) + y_{lk} (y_{ji} z_{kj} - y_{kj} z_{ji}) + (x_i - x_k) (x_{kj} z_{lk} - x_{lk} z_{kj}) + (y_i - y_k) (y_{kj} z_{lk} - y_{lk} z_{kj}) \quad (413)$$

$$\frac{d}{dx_k} a_{ijkl} = -y_{ji} (x_{kj} y_{lk} - x_{lk} y_{kj}) - z_{ji} (x_{kj} z_{lk} - x_{lk} z_{kj}) - (y_j - y_l) (x_{ji} y_{kj} - x_{kj} y_{ji}) - (z_j - z_l) (x_{ji} z_{kj} - x_{kj} z_{ji}) \quad (414)$$

$$\frac{d}{dy_k} a_{ijkl} = x_{ji} (x_{kj} y_{lk} - x_{lk} y_{kj}) - z_{ji} (y_{kj} z_{lk} - y_{lk} z_{kj}) + (x_j - x_l) (x_{ji} y_{kj} - x_{kj} y_{ji}) - (z_j - z_l) (y_{ji} z_{kj} - y_{kj} z_{ji}) \quad (415)$$

$$\frac{d}{dz_k} a_{ijkl} = x_{ji} (x_{kj} z_{lk} - x_{lk} z_{kj}) + y_{ji} (y_{kj} z_{lk} - y_{lk} z_{kj}) + (x_j - x_l) (x_{ji} z_{kj} - x_{kj} z_{ji}) + (y_j - y_l) (y_{ji} z_{kj} - y_{kj} z_{ji}) \quad (416)$$

$$\frac{d}{dx_l} a_{ijkl} = -y_{kj} (x_{ji} y_{kj} - x_{kj} y_{ji}) - z_{kj} (x_{ji} z_{kj} - x_{kj} z_{ji}) \quad (417)$$

$$\frac{d}{dy_l} a_{ijkl} = x_{kj} (x_{ji} y_{kj} - x_{kj} y_{ji}) - z_{kj} (y_{ji} z_{kj} - y_{kj} z_{ji}) \quad (418)$$

$$\frac{d}{dz_l} a_{ijkl} = x_{kj} (x_{ji} z_{kj} - x_{kj} z_{ji}) + y_{kj} (y_{ji} z_{kj} - y_{kj} z_{ji}) \quad (419)$$

$$\frac{d^2}{dx_i^2} a_{ijkl} = 0 \quad (420)$$

$$\frac{d^2}{dy_i dx_i} a_{ijkl} = 0 \quad (421)$$

$$\frac{d^2}{dz_i dx_i} a_{ijkl} = 0 \quad (422)$$

$$\frac{d^2}{dx_j dx_i} a_{ijkl} = y_{kj} y_{lk} + z_{kj} z_{lk} \quad (423)$$

$$\frac{d^2}{dy_j dx_i} a_{ijkl} = x_{kj} y_{lk} - 2x_{lk} y_{kj} \quad (424)$$

$$\frac{d^2}{dz_j dx_i} a_{ijkl} = x_{kj} z_{lk} - 2x_{lk} z_{kj} \quad (425)$$

$$\frac{d^2}{dx_k dx_i} a_{ijkl} = -y_{kj} (-y_j + y_l) - z_{kj} (-z_j + z_l) \quad (426)$$

$$\frac{d^2}{dy_k dx_i} a_{ijkl} = -x_{kj} y_{lk} + x_{lk} y_{kj} - y_{kj} (x_j - x_l) \quad (427)$$

$$\frac{d^2}{dz_k dx_i} a_{ijkl} = -x_{kj} z_{lk} + x_{lk} z_{kj} - z_{kj} (x_j - x_l) \quad (428)$$

$$\frac{d^2}{dx_l dx_i} a_{ijkl} = y_{kj}^2 + z_{kj}^2 \quad (429)$$

$$\frac{d^2}{dy_l dx_i} a_{ijkl} = -x_{kj} y_{kj} \quad (430)$$

$$\frac{d^2}{dz_l dx_i} a_{ijkl} = -x_{kj} z_{kj} \quad (431)$$

$$\frac{d^2}{dy_i^2} a_{ijkl} = 0 \quad (432)$$

$$\frac{d^2}{dz_i dy_i} a_{ijkl} = 0 \quad (433)$$

$$\frac{d^2}{dx_j dy_i} a_{ijkl} = -2x_{kj} y_{lk} + x_{lk} y_{kj} \quad (434)$$

$$\frac{d^2}{dy_j dy_i} a_{ijkl} = x_{kj} x_{lk} + z_{kj} z_{lk} \quad (435)$$

$$\frac{d^2}{dz_j dy_i} a_{ijkl} = y_{kj} z_{lk} - 2y_{lk} z_{kj} \quad (436)$$

$$\frac{d^2}{dx_k dy_i} a_{ijkl} = x_{kj} y_{lk} + x_{kj} (-y_j + y_l) - x_{lk} y_{kj} \quad (437)$$

$$\frac{d^2}{dy_k dy_i} a_{ijkl} = x_{kj} (x_j - x_l) - z_{kj} (-z_j + z_l) \quad (438)$$

$$\frac{d^2}{dz_k dy_i} a_{ijkl} = -y_{kj} z_{lk} + y_{lk} z_{kj} - z_{kj} (y_j - y_l) \quad (439)$$

$$\frac{d^2}{dx_l dy_i} a_{ijkl} = -x_{kj} y_{kj} \quad (440)$$

$$\frac{d^2}{dy_l dy_i} a_{ijkl} = x_{kj}^2 + z_{kj}^2 \quad (441)$$

$$\frac{d^2}{dz_l dy_i} a_{ijkl} = -y_{kj} z_{kj} \quad (442)$$

$$\frac{d^2}{dz_i^2} a_{ijkl} = 0 \quad (443)$$

$$\frac{d^2}{dx_j dz_i} a_{ijkl} = -2x_{kj} z_{lk} + x_{lk} z_{kj} \quad (444)$$

$$\frac{d^2}{dy_j dz_i} a_{ijkl} = -2y_{kj} z_{lk} + y_{lk} z_{kj} \quad (445)$$

$$\frac{d^2}{dz_j dz_i} a_{ijkl} = x_{kj} x_{lk} + y_{kj} y_{lk} \quad (446)$$

$$\frac{d^2}{dx_k dz_i} a_{ijkl} = x_{kj} z_{lk} + x_{kj} (-z_j + z_l) - x_{lk} z_{kj} \quad (447)$$

$$\frac{d^2}{dy_k dz_i} a_{ijkl} = y_{kj} z_{lk} + y_{kj} (-z_j + z_l) - y_{lk} z_{kj} \quad (448)$$

$$\frac{d^2}{dz_k dz_i} a_{ijkl} = x_{kj} (x_j - x_l) + y_{kj} (y_j - y_l) \quad (449)$$

$$\frac{d^2}{dx_l dz_i} a_{ijkl} = -x_{kj} z_{kj} \quad (450)$$

$$\frac{d^2}{dy_l dz_i} a_{ijkl} = -y_{kj} z_{kj} \quad (451)$$

$$\frac{d^2}{dz_l dz_i} a_{ijkl} = x_{kj}^2 + y_{kj}^2 \quad (452)$$

$$\frac{d^2}{dx_j^2} a_{ijkl} = -y_{lk} (-y_i + y_k) + y_{lk} (y_i - y_k) - z_{lk} (-z_i + z_k) + z_{lk} (z_i - z_k) \quad (453)$$

$$\frac{d^2}{dy_j dx_j} a_{ijkl} = -x_{lk} (y_i - y_k) - y_{lk} (x_i - x_k) \quad (454)$$

$$\frac{d^2}{dz_j dx_j} a_{ijkl} = -x_{lk} (z_i - z_k) - z_{lk} (x_i - x_k) \quad (455)$$

$$\frac{d^2}{dx_k dx_j} a_{ijkl} = y_{ji} y_{lk} + z_{ji} z_{lk} - (y_i - y_k) (-y_j + y_l) - (z_i - z_k) (-z_j + z_l) \quad (456)$$

$$\frac{d^2}{dy_k dx_j} a_{ijkl} = x_{ji} y_{kj} - x_{ji} y_{lk} - x_{kj} y_{ji} + x_{kj} y_{lk} - x_{lk} y_{kj} - (x_j - x_l) (y_i - y_k) \quad (457)$$

$$\frac{d^2}{dz_k dx_j} a_{ijkl} = x_{ji} z_{kj} - x_{ji} z_{lk} - x_{kj} z_{ji} + x_{kj} z_{lk} - x_{lk} z_{kj} - (x_j - x_l) (z_i - z_k) \quad (458)$$

$$\frac{d^2}{dx_l dx_j} a_{ijkl} = y_{kj} (y_i - y_k) + z_{kj} (z_i - z_k) \quad (459)$$

$$\frac{d^2}{dy_l dx_j} a_{ijkl} = -x_{ji} y_{kj} + x_{kj} y_{ji} - x_{kj} (y_i - y_k) \quad (460)$$

$$\frac{d^2}{dz_l dx_j} a_{ijkl} = -x_{ji} z_{kj} + x_{kj} z_{ji} - x_{kj} (z_i - z_k) \quad (461)$$

$$\frac{d^2}{dy_j^2} a_{ijkl} = 2x_{lk} (x_i - x_k) - z_{lk} (-z_i + z_k) + z_{lk} (z_i - z_k) \quad (462)$$

$$\frac{d^2}{dz_j dy_j} a_{ijkl} = -y_{lk} (z_i - z_k) - z_{lk} (y_i - y_k) \quad (463)$$

$$\frac{d^2}{dx_k dy_j} a_{ijkl} = -x_{ji} y_{kj} + x_{kj} y_{ji} - x_{kj} y_{lk} - x_{lk} y_{ji} + x_{lk} y_{kj} + (x_i - x_k) (-y_j + y_l) \quad (464)$$

$$\frac{d^2}{dy_k dy_j} a_{ijkl} = x_{ji} x_{lk} + z_{ji} z_{lk} + (x_i - x_k) (x_j - x_l) - (z_i - z_k) (-z_j + z_l) \quad (465)$$

$$\frac{d^2}{dz_k dy_j} a_{ijkl} = y_{ji} z_{kj} - y_{ji} z_{lk} - y_{kj} z_{ji} + y_{kj} z_{lk} - y_{lk} z_{kj} - (y_j - y_l) (z_i - z_k) \quad (466)$$

$$\frac{d^2}{dx_l dy_j} a_{ijkl} = x_{ji} y_{kj} - x_{kj} y_{ji} - y_{kj} (x_i - x_k) \quad (467)$$

$$\frac{d^2}{dy_l dy_j} a_{ijkl} = x_{kj} (x_i - x_k) + z_{kj} (z_i - z_k) \quad (468)$$

$$\frac{d^2}{dz_l dy_j} a_{ijkl} = -y_{ji} z_{kj} + y_{kj} z_{ji} - y_{kj} (z_i - z_k) \quad (469)$$

$$\frac{d^2}{dz_j^2} a_{ijkl} = 2x_{lk} (x_i - x_k) + 2y_{lk} (y_i - y_k) \quad (470)$$

$$\frac{d^2}{dx_k dz_j} a_{ijkl} = -x_{ji} z_{kj} + x_{kj} z_{ji} - x_{kj} z_{lk} - x_{lk} z_{ji} + x_{lk} z_{kj} + (x_i - x_k) (-z_j + z_l) \quad (471)$$

$$\frac{d^2}{dy_k dz_j} a_{ijkl} = -y_{ji} z_{kj} + y_{kj} z_{ji} - y_{kj} z_{lk} - y_{lk} z_{ji} + y_{lk} z_{kj} + (y_i - y_k) (-z_j + z_l) \quad (472)$$

$$\frac{d^2}{dz_k dz_j} a_{ijkl} = x_{ji} x_{lk} + y_{ji} y_{lk} + (x_i - x_k) (x_j - x_l) + (y_i - y_k) (y_j - y_l) \quad (473)$$

$$\frac{d^2}{dx_l dz_j} a_{ijkl} = x_{ji} z_{kj} - x_{kj} z_{ji} - z_{kj} (x_i - x_k) \quad (474)$$

$$\frac{d^2}{dy_l dz_j} a_{ijkl} = y_{ji} z_{kj} - y_{kj} z_{ji} - z_{kj} (y_i - y_k) \quad (475)$$

$$\frac{d^2}{dz_l dz_j} a_{ijkl} = x_{kj} (x_i - x_k) + y_{kj} (y_i - y_k) \quad (476)$$



$$\frac{d^2}{dx_k^2} a_{ijkl} = -y_{ji}(-y_j + y_l) + y_{ji}(y_j - y_l) - z_{ji}(-z_j + z_l) + z_{ji}(z_j - z_l) \quad (477)$$

$$\frac{d^2}{dy_k dx_k} a_{ijkl} = -x_{ji}(y_j - y_l) - y_{ji}(x_j - x_l) \quad (478)$$

$$\frac{d^2}{dz_k dx_k} a_{ijkl} = -x_{ji}(z_j - z_l) - z_{ji}(x_j - x_l) \quad (479)$$

$$\frac{d^2}{dx_l dx_k} a_{ijkl} = y_{ji}y_{kj} + z_{ji}z_{kj} \quad (480)$$

$$\frac{d^2}{dy_l dx_k} a_{ijkl} = x_{ji}y_{kj} - 2x_{kj}y_{ji} \quad (481)$$

$$\frac{d^2}{dz_l dx_k} a_{ijkl} = x_{ji}z_{kj} - 2x_{kj}z_{ji} \quad (482)$$

$$\frac{d^2}{dy_k^2} a_{ijkl} = 2x_{ji}(x_j - x_l) - z_{ji}(-z_j + z_l) + z_{ji}(z_j - z_l) \quad (483)$$

$$\frac{d^2}{dz_k dy_k} a_{ijkl} = -y_{ji}(z_j - z_l) - z_{ji}(y_j - y_l) \quad (484)$$

$$\frac{d^2}{dx_l dy_k} a_{ijkl} = -2x_{ji}y_{kj} + x_{kj}y_{ji} \quad (485)$$

$$\frac{d^2}{dy_l dy_k} a_{ijkl} = x_{ji}x_{kj} + z_{ji}z_{kj} \quad (486)$$

$$\frac{d^2}{dz_l dy_k} a_{ijkl} = y_{ji}z_{kj} - 2y_{kj}z_{ji} \quad (487)$$

$$\frac{d^2}{dz_k^2} a_{ijkl} = 2x_{ji}(x_j - x_l) + 2y_{ji}(y_j - y_l) \quad (488)$$

$$\frac{d^2}{dx_l dz_k} a_{ijkl} = -2x_{ji}z_{kj} + x_{kj}z_{ji} \quad (489)$$

$$\frac{d^2}{dy_l dz_k} a_{ijkl} = -2y_{ji}z_{kj} + y_{kj}z_{ji} \quad (490)$$

$$\frac{d^2}{dz_l dz_k} a_{ijkl} = x_{ji}x_{kj} + y_{ji}y_{kj} \quad (491)$$

$$\frac{d^2}{dx_l^2} a_{ijkl} = 0 \quad (492)$$

$$\frac{d^2}{dy_l dx_l} a_{ijkl} = 0 \quad (493)$$

$$\frac{d^2}{dz_l dx_l} a_{ijkl} = 0 \quad (494)$$

$$\frac{d^2}{dy_l^2} a_{ijkl} = 0 \quad (495)$$

$$\frac{d^2}{dz_l dy_l} a_{ijkl} = 0 \quad (496)$$

$$\frac{d^2}{dz_l^2} a_{ijkl} = 0 \quad (497)$$

### S1.3.4 Derivatives of $d_{ijkl}$

The first and second order derivatives of  $d_{ijkl}$  with respect to the coordinates  $x$ ,  $y$  and  $z$  of the participating atoms  $i, j, k$  and  $l$  are:

$$\frac{d}{dx_i} d_{ijkl} = r_{kj} (-y_{kj} z_{lk} + y_{lk} z_{kj}) \quad (498)$$

$$\frac{d}{dy_i} d_{ijkl} = r_{kj} (x_{kj} z_{lk} - x_{lk} z_{kj}) \quad (499)$$

$$\frac{d}{dz_i} d_{ijkl} = r_{kj} (-x_{kj} y_{lk} + x_{lk} y_{kj}) \quad (500)$$

$$\frac{d}{dx_j} d_{ijkl} = r_{kj} (y_{ji} z_{lk} + y_{kj} z_{lk} - y_{lk} z_{ji} - y_{lk} z_{kj}) - \frac{x_{kj} (x_{ji} (y_{kj} z_{lk} - y_{lk} z_{kj}) + y_{ji} (-x_{kj} z_{lk} + x_{lk} z_{kj}) + z_{ji} (x_{kj} y_{lk} - x_{lk} y_{kj}))}{r_{kj}} \quad (501)$$

$$\frac{d}{dy_j} d_{ijkl} = r_{kj} (-x_{ji} z_{lk} - x_{kj} z_{lk} + x_{lk} z_{ji} + x_{lk} z_{kj}) - \frac{y_{kj} (x_{ji} (y_{kj} z_{lk} - y_{lk} z_{kj}) + y_{ji} (-x_{kj} z_{lk} + x_{lk} z_{kj}) + z_{ji} (x_{kj} y_{lk} - x_{lk} y_{kj}))}{r_{kj}} \quad (502)$$

$$\frac{d}{dz_j} d_{ijkl} = r_{kj} (x_{ji} y_{lk} + x_{kj} y_{lk} - x_{lk} y_{ji} - x_{lk} y_{kj}) - \frac{z_{kj} (x_{ji} (y_{kj} z_{lk} - y_{lk} z_{kj}) + y_{ji} (-x_{kj} z_{lk} + x_{lk} z_{kj}) + z_{ji} (x_{kj} y_{lk} - x_{lk} y_{kj}))}{r_{kj}} \quad (503)$$

$$\frac{d}{dx_k} d_{ijkl} = r_{kj} (y_{ji} (z_j - z_l) + z_{ji} (-y_j + y_l)) + \frac{x_{kj} (x_{ji} (y_{kj} z_{lk} - y_{lk} z_{kj}) + y_{ji} (-x_{kj} z_{lk} + x_{lk} z_{kj}) + z_{ji} (x_{kj} y_{lk} - x_{lk} y_{kj}))}{r_{kj}} \quad (504)$$

$$\frac{d}{dy_k} d_{ijkl} = r_{kj} (x_{ji} (-z_j + z_l) + z_{ji} (x_j - x_l)) + \frac{y_{kj} (x_{ji} (y_{kj} z_{lk} - y_{lk} z_{kj}) + y_{ji} (-x_{kj} z_{lk} + x_{lk} z_{kj}) + z_{ji} (x_{kj} y_{lk} - x_{lk} y_{kj}))}{r_{kj}} \quad (505)$$

$$\frac{d}{dz_k} d_{ijkl} = r_{kj} (x_{ji} (y_j - y_l) + y_{ji} (-x_j + x_l)) + \frac{z_{kj} (x_{ji} (y_{kj} z_{lk} - y_{lk} z_{kj}) + y_{ji} (-x_{kj} z_{lk} + x_{lk} z_{kj}) + z_{ji} (x_{kj} y_{lk} - x_{lk} y_{kj}))}{r_{kj}} \quad (506)$$

$$\frac{d}{dx_l} d_{ijkl} = r_{kj} (y_{ji} z_{kj} - y_{kj} z_{ji}) \quad (507)$$

$$\frac{d}{dy_l} d_{ijkl} = r_{kj} (-x_{ji} z_{kj} + x_{kj} z_{ji}) \quad (508)$$

$$\frac{d}{dz_l} d_{ijkl} = r_{kj} (x_{ji} y_{kj} - x_{kj} y_{ji}) \quad (509)$$

$$\frac{d^2}{dx_i^2} d_{ijkl} = 0 \quad (510)$$

$$\frac{d^2}{dy_i dx_i} d_{ijkl} = 0 \quad (511)$$

$$\frac{d^2}{dz_i dx_i} d_{ijkl} = 0 \quad (512)$$

$$\frac{d^2}{dx_j dx_i} d_{ijkl} = -\frac{x_{kj} (-y_{kj} z_{lk} + y_{lk} z_{kj})}{r_{kj}} \quad (513)$$

$$\frac{d^2}{dy_j dx_i} d_{ijkl} = r_{kj} z_{lk} - \frac{y_{kj} (-y_{kj} z_{lk} + y_{lk} z_{kj})}{r_{kj}} \quad (514)$$

$$\frac{d^2}{dz_j dx_i} d_{ijkl} = -r_{kj} y_{lk} - \frac{z_{kj} (-y_{kj} z_{lk} + y_{lk} z_{kj})}{r_{kj}} \quad (515)$$

$$\frac{d^2}{dx_k dx_i} d_{ijkl} = \frac{x_{kj} (-y_{kj} z_{lk} + y_{lk} z_{kj})}{r_{kj}} \quad (516)$$

$$\frac{d^2}{dy_k dx_i} d_{ijkl} = r_{kj} (z_j - z_l) + \frac{y_{kj} (-y_{kj} z_{lk} + y_{lk} z_{kj})}{r_{kj}} \quad (517)$$

$$\frac{d^2}{dz_k dx_i} d_{ijkl} = r_{kj} (-y_j + y_l) + \frac{z_{kj} (-y_{kj} z_{lk} + y_{lk} z_{kj})}{r_{kj}} \quad (518)$$

$$\frac{d^2}{dx_l dx_i} d_{ijkl} = 0 \quad (519)$$

$$\frac{d^2}{dy_l dx_i} d_{ijkl} = r_{kj} z_{kj} \quad (520)$$

$$\frac{d^2}{dz_l dx_i} d_{ijkl} = -r_{kj} y_{kj} \quad (521)$$

$$\frac{d^2}{dy_i^2} d_{ijkl} = 0 \quad (522)$$

$$\frac{d^2}{dz_i dy_i} d_{ijkl} = 0 \quad (523)$$

$$\frac{d^2}{dx_j dy_i} d_{ijkl} = -r_{kj} z_{lk} - \frac{x_{kj} (x_{kj} z_{lk} - x_{lk} z_{kj})}{r_{kj}} \quad (524)$$

$$\frac{d^2}{dy_j dy_i} d_{ijkl} = -\frac{y_{kj} (x_{kj} z_{lk} - x_{lk} z_{kj})}{r_{kj}} \quad (525)$$

$$\frac{d^2}{dz_j dy_i} d_{ijkl} = r_{kj} x_{lk} - \frac{z_{kj} (x_{kj} z_{lk} - x_{lk} z_{kj})}{r_{kj}} \quad (526)$$

$$\frac{d^2}{dx_k dy_i} d_{ijkl} = r_{kj} (-z_j + z_l) + \frac{x_{kj} (x_{kj} z_{lk} - x_{lk} z_{kj})}{r_{kj}} \quad (527)$$

$$\frac{d^2}{dy_k dy_i} d_{ijkl} = \frac{y_{kj} (x_{kj} z_{lk} - x_{lk} z_{kj})}{r_{kj}} \quad (528)$$

$$\frac{d^2}{dz_k dy_i} d_{ijkl} = r_{kj} (x_j - x_l) + \frac{z_{kj} (x_{kj} z_{lk} - x_{lk} z_{kj})}{r_{kj}} \quad (529)$$

$$\frac{d^2}{dx_l dy_i} d_{ijkl} = -r_{kj} z_{kj} \quad (530)$$

$$\frac{d^2}{dy_l dy_i} d_{ijkl} = 0 \quad (531)$$

$$\frac{d^2}{dz_l dy_i} d_{ijkl} = r_{kj} x_{kj} \quad (532)$$

$$\frac{d^2}{dz_i^2} d_{ijkl} = 0 \quad (533)$$

$$\frac{d^2}{dx_j dz_i} d_{ijkl} = r_{kj} y_{lk} - \frac{x_{kj} (-x_{kj} y_{lk} + x_{lk} y_{kj})}{r_{kj}} \quad (534)$$

$$\frac{d^2}{dy_j dz_i} d_{ijkl} = -r_{kj} x_{lk} - \frac{y_{kj} (-x_{kj} y_{lk} + x_{lk} y_{kj})}{r_{kj}} \quad (535)$$

$$\frac{d^2}{dz_j dz_i} d_{ijkl} = -\frac{z_{kj} (-x_{kj} y_{lk} + x_{lk} y_{kj})}{r_{kj}} \quad (536)$$

$$\frac{d^2}{dx_k dz_i} d_{ijkl} = r_{kj} (y_j - y_l) + \frac{x_{kj} (-x_{kj} y_{lk} + x_{lk} y_{kj})}{r_{kj}} \quad (537)$$

$$\frac{d^2}{dy_k dz_i} d_{ijkl} = r_{kj} (-x_j + x_l) + \frac{y_{kj} (-x_{kj} y_{lk} + x_{lk} y_{kj})}{r_{kj}} \quad (538)$$

$$\frac{d^2}{dz_k dz_i} d_{ijkl} = \frac{z_{kj} (-x_{kj} y_{lk} + x_{lk} y_{kj})}{r_{kj}} \quad (539)$$

$$\frac{d^2}{dx_l dz_i} d_{ijkl} = r_{kj} y_{kj} \quad (540)$$

$$\frac{d^2}{dy_l dz_i} d_{ijkl} = -r_{kj} x_{kj} \quad (541)$$

$$\frac{d^2}{dz_l dz_i} d_{ijkl} = 0 \quad (542)$$

$$\begin{aligned} \frac{d^2}{dx_j^2} d_{ijkl} = & -\frac{2x_{kj} (y_{ji} z_{lk} + y_{kj} z_{lk} - y_{lk} z_{ji} - y_{lk} z_{kj})}{r_{kj}} \\ & + \frac{x_{ji} (y_{kj} z_{lk} - y_{lk} z_{kj}) + y_{ji} (-x_{kj} z_{lk} + x_{lk} z_{kj}) + z_{ji} (x_{kj} y_{lk} - x_{lk} y_{kj})}{r_{kj}} \\ & - \frac{x_{kj}^2 (x_{ji} (y_{kj} z_{lk} - y_{lk} z_{kj}) + y_{ji} (-x_{kj} z_{lk} + x_{lk} z_{kj}) + z_{ji} (x_{kj} y_{lk} - x_{lk} y_{kj}))}{r_{kj}^3} \end{aligned} \quad (543)$$

$$\frac{d^2}{dy_j dx_j} d_{ijkl} = -\frac{x_{kj}(-x_{ji}z_{lk} - x_{kj}z_{lk} + x_{lk}z_{ji} + x_{lk}z_{kj})}{r_{kj}} \quad (544)$$

$$-\frac{y_{kj}(y_{ji}z_{lk} + y_{kj}z_{lk} - y_{lk}z_{ji} - y_{lk}z_{kj})}{r_{kj}}$$

$$-\frac{x_{kj}y_{kj}(x_{ji}(y_{kj}z_{lk} - y_{lk}z_{kj}) + y_{ji}(-x_{kj}z_{lk} + x_{lk}z_{kj}) + z_{ji}(x_{kj}y_{lk} - x_{lk}y_{kj}))}{r_{kj}^3}$$

$$\frac{d^2}{dz_j dx_j} d_{ijkl} = -\frac{x_{kj}(x_{ji}y_{lk} + x_{kj}y_{lk} - x_{lk}y_{ji} - x_{lk}y_{kj})}{r_{kj}} \quad (545)$$

$$-\frac{z_{kj}(y_{ji}z_{lk} + y_{kj}z_{lk} - y_{lk}z_{ji} - y_{lk}z_{kj})}{r_{kj}}$$

$$-\frac{x_{kj}z_{kj}(x_{ji}(y_{kj}z_{lk} - y_{lk}z_{kj}) + y_{ji}(-x_{kj}z_{lk} + x_{lk}z_{kj}) + z_{ji}(x_{kj}y_{lk} - x_{lk}y_{kj}))}{r_{kj}^3}$$

$$\frac{d^2}{dx_k dx_j} d_{ijkl} = -\frac{x_{kj}(y_{ji}(z_j - z_l) + z_{ji}(-y_j + y_l))}{r_{kj}} \quad (546)$$

$$+\frac{x_{kj}(y_{ji}z_{lk} + y_{kj}z_{lk} - y_{lk}z_{ji} - y_{lk}z_{kj})}{r_{kj}}$$

$$-\frac{x_{ji}(y_{kj}z_{lk} - y_{lk}z_{kj}) + y_{ji}(-x_{kj}z_{lk} + x_{lk}z_{kj}) + z_{ji}(x_{kj}y_{lk} - x_{lk}y_{kj})}{r_{kj}}$$

$$+\frac{x_{kj}^2(x_{ji}(y_{kj}z_{lk} - y_{lk}z_{kj}) + y_{ji}(-x_{kj}z_{lk} + x_{lk}z_{kj}) + z_{ji}(x_{kj}y_{lk} - x_{lk}y_{kj}))}{r_{kj}^3}$$

$$\frac{d^2}{dy_k dx_j} d_{ijkl} = r_{kj}(-z_i + z_l) - \frac{x_{kj}(x_{ji}(-z_j + z_l) + z_{ji}(x_j - x_l))}{r_{kj}} \quad (547)$$

$$+\frac{y_{kj}(y_{ji}z_{lk} + y_{kj}z_{lk} - y_{lk}z_{ji} - y_{lk}z_{kj})}{r_{kj}}$$

$$+\frac{x_{kj}y_{kj}(x_{ji}(y_{kj}z_{lk} - y_{lk}z_{kj}) + y_{ji}(-x_{kj}z_{lk} + x_{lk}z_{kj}) + z_{ji}(x_{kj}y_{lk} - x_{lk}y_{kj}))}{r_{kj}^3}$$

$$\frac{d^2}{dz_k dx_j} d_{ijkl} = r_{kj}(y_i - y_l) - \frac{x_{kj}(x_{ji}(y_j - y_l) + y_{ji}(-x_j + x_l))}{r_{kj}} \quad (548)$$

$$+\frac{z_{kj}(y_{ji}z_{lk} + y_{kj}z_{lk} - y_{lk}z_{ji} - y_{lk}z_{kj})}{r_{kj}}$$

$$+\frac{x_{kj}z_{kj}(x_{ji}(y_{kj}z_{lk} - y_{lk}z_{kj}) + y_{ji}(-x_{kj}z_{lk} + x_{lk}z_{kj}) + z_{ji}(x_{kj}y_{lk} - x_{lk}y_{kj}))}{r_{kj}^3}$$

$$\frac{d^2}{dx_l dx_j} d_{ijkl} = -\frac{x_{kj} (y_{ji} z_{kj} - y_{kj} z_{ji})}{r_{kj}} \quad (549)$$

$$\frac{d^2}{dy_l dx_j} d_{ijkl} = r_{kj} (z_i - z_k) - \frac{x_{kj} (-x_{ji} z_{kj} + x_{kj} z_{ji})}{r_{kj}} \quad (550)$$

$$\frac{d^2}{dz_l dx_j} d_{ijkl} = r_{kj} (-y_i + y_k) - \frac{x_{kj} (x_{ji} y_{kj} - x_{kj} y_{ji})}{r_{kj}} \quad (551)$$

$$\begin{aligned} \frac{d^2}{dy_j^2} d_{ijkl} = & -\frac{2y_{kj} (-x_{ji} z_{lk} - x_{kj} z_{lk} + x_{lk} z_{ji} + x_{lk} z_{kj})}{r_{kj}} \\ & + \frac{x_{ji} (y_{kj} z_{lk} - y_{lk} z_{kj}) + y_{ji} (-x_{kj} z_{lk} + x_{lk} z_{kj}) + z_{ji} (x_{kj} y_{lk} - x_{lk} y_{kj})}{r_{kj}} \\ & - \frac{y_{kj}^2 (x_{ji} (y_{kj} z_{lk} - y_{lk} z_{kj}) + y_{ji} (-x_{kj} z_{lk} + x_{lk} z_{kj}) + z_{ji} (x_{kj} y_{lk} - x_{lk} y_{kj}))}{r_{kj}^3} \end{aligned} \quad (552)$$

$$\begin{aligned} \frac{d^2}{dz_j dy_j} d_{ijkl} = & -\frac{y_{kj} (x_{ji} y_{lk} + x_{kj} y_{lk} - x_{lk} y_{ji} - x_{lk} y_{kj})}{r_{kj}} - \frac{z_{kj} (-x_{ji} z_{lk} - x_{kj} z_{lk} + x_{lk} z_{ji} + x_{lk} z_{kj})}{r_{kj}} \\ & - \frac{y_{kj} z_{kj} (x_{ji} (y_{kj} z_{lk} - y_{lk} z_{kj}) + y_{ji} (-x_{kj} z_{lk} + x_{lk} z_{kj}) + z_{ji} (x_{kj} y_{lk} - x_{lk} y_{kj}))}{r_{kj}^3} \end{aligned} \quad (553)$$

$$\begin{aligned} \frac{d^2}{dx_k dy_j} d_{ijkl} = & r_{kj} (z_i - z_l) + \frac{x_{kj} (-x_{ji} z_{lk} - x_{kj} z_{lk} + x_{lk} z_{ji} + x_{lk} z_{kj})}{r_{kj}} \\ & - \frac{y_{kj} (y_{ji} (z_j - z_l) + z_{ji} (-y_j + y_l))}{r_{kj}} \\ & + \frac{x_{kj} y_{kj} (x_{ji} (y_{kj} z_{lk} - y_{lk} z_{kj}) + y_{ji} (-x_{kj} z_{lk} + x_{lk} z_{kj}) + z_{ji} (x_{kj} y_{lk} - x_{lk} y_{kj}))}{r_{kj}^3} \end{aligned} \quad (554)$$

$$\begin{aligned} \frac{d^2}{dy_k dy_j} d_{ijkl} = & -\frac{y_{kj} (x_{ji} (-z_j + z_l) + z_{ji} (x_j - x_l))}{r_{kj}} \\ & + \frac{y_{kj} (-x_{ji} z_{lk} - x_{kj} z_{lk} + x_{lk} z_{ji} + x_{lk} z_{kj})}{r_{kj}} \\ & - \frac{x_{ji} (y_{kj} z_{lk} - y_{lk} z_{kj}) + y_{ji} (-x_{kj} z_{lk} + x_{lk} z_{kj}) + z_{ji} (x_{kj} y_{lk} - x_{lk} y_{kj})}{r_{kj}} \\ & + \frac{y_{kj}^2 (x_{ji} (y_{kj} z_{lk} - y_{lk} z_{kj}) + y_{ji} (-x_{kj} z_{lk} + x_{lk} z_{kj}) + z_{ji} (x_{kj} y_{lk} - x_{lk} y_{kj}))}{r_{kj}^3} \end{aligned} \quad (555)$$

$$\frac{d^2}{dz_k dy_j} d_{ijkl} = r_{kj} (-x_i + x_l) - \frac{y_{kj} (x_{ji} (y_j - y_l) + y_{ji} (-x_j + x_l))}{r_{kj}} \quad (556)$$

$$+ \frac{z_{kj} (-x_{ji} z_{lk} - x_{kj} z_{lk} + x_{lk} z_{ji} + x_{lk} z_{kj})}{r_{kj}}$$

$$+ \frac{y_{kj} z_{kj} (x_{ji} (y_{kj} z_{lk} - y_{lk} z_{kj}) + y_{ji} (-x_{kj} z_{lk} + x_{lk} z_{kj}) + z_{ji} (x_{kj} y_{lk} - x_{lk} y_{kj}))}{r_{kj}^3}$$

$$\frac{d^2}{dx_l dy_j} d_{ijkl} = r_{kj} (-z_i + z_k) - \frac{y_{kj} (y_{ji} z_{kj} - y_{kj} z_{ji})}{r_{kj}} \quad (557)$$

$$\frac{d^2}{dy_l dy_j} d_{ijkl} = -\frac{y_{kj} (-x_{ji} z_{kj} + x_{kj} z_{ji})}{r_{kj}} \quad (558)$$

$$\frac{d^2}{dz_l dy_j} d_{ijkl} = r_{kj} (x_i - x_k) - \frac{y_{kj} (x_{ji} y_{kj} - x_{kj} y_{ji})}{r_{kj}} \quad (559)$$

$$\frac{d^2}{dz_j^2} d_{ijkl} = -\frac{2z_{kj} (x_{ji} y_{lk} + x_{kj} y_{lk} - x_{lk} y_{ji} - x_{lk} y_{kj})}{r_{kj}} \quad (560)$$

$$+ \frac{x_{ji} (y_{kj} z_{lk} - y_{lk} z_{kj}) + y_{ji} (-x_{kj} z_{lk} + x_{lk} z_{kj}) + z_{ji} (x_{kj} y_{lk} - x_{lk} y_{kj})}{r_{kj}}$$

$$- \frac{z_{kj}^2 (x_{ji} (y_{kj} z_{lk} - y_{lk} z_{kj}) + y_{ji} (-x_{kj} z_{lk} + x_{lk} z_{kj}) + z_{ji} (x_{kj} y_{lk} - x_{lk} y_{kj}))}{r_{kj}^3}$$

$$\frac{d^2}{dx_k dz_j} d_{ijkl} = r_{kj} (-y_i + y_l) + \frac{x_{kj} (x_{ji} y_{lk} + x_{kj} y_{lk} - x_{lk} y_{ji} - x_{lk} y_{kj})}{r_{kj}} \quad (561)$$

$$- \frac{z_{kj} (y_{ji} (z_j - z_l) + z_{ji} (-y_j + y_l))}{r_{kj}}$$

$$+ \frac{x_{kj} z_{kj} (x_{ji} (y_{kj} z_{lk} - y_{lk} z_{kj}) + y_{ji} (-x_{kj} z_{lk} + x_{lk} z_{kj}) + z_{ji} (x_{kj} y_{lk} - x_{lk} y_{kj}))}{r_{kj}^3}$$

$$\frac{d^2}{dy_k dz_j} d_{ijkl} = r_{kj} (x_i - x_l) + \frac{y_{kj} (x_{ji} y_{lk} + x_{kj} y_{lk} - x_{lk} y_{ji} - x_{lk} y_{kj})}{r_{kj}} \quad (562)$$

$$- \frac{z_{kj} (x_{ji} (-z_j + z_l) + z_{ji} (x_j - x_l))}{r_{kj}}$$

$$+ \frac{y_{kj} z_{kj} (x_{ji} (y_{kj} z_{lk} - y_{lk} z_{kj}) + y_{ji} (-x_{kj} z_{lk} + x_{lk} z_{kj}) + z_{ji} (x_{kj} y_{lk} - x_{lk} y_{kj}))}{r_{kj}^3}$$



$$\begin{aligned} \frac{d^2}{dz_k dz_j} d_{ijkl} = & -\frac{z_{kj}(x_{ji}(y_j - y_l) + y_{ji}(-x_j + x_l))}{r_{kj}} + \frac{z_{kj}(x_{ji}y_{lk} + x_{kj}y_{lk} - x_{lk}y_{ji} - x_{lk}y_{kj})}{r_{kj}} \\ & - \frac{x_{ji}(y_{kj}z_{lk} - y_{lk}z_{kj}) + y_{ji}(-x_{kj}z_{lk} + x_{lk}z_{kj}) + z_{ji}(x_{kj}y_{lk} - x_{lk}y_{kj})}{r_{kj}} \\ & + \frac{z_{kj}^2(x_{ji}(y_{kj}z_{lk} - y_{lk}z_{kj}) + y_{ji}(-x_{kj}z_{lk} + x_{lk}z_{kj}) + z_{ji}(x_{kj}y_{lk} - x_{lk}y_{kj}))}{r_{kj}^3} \end{aligned} \quad (563)$$

$$\frac{d^2}{dx_l dz_j} d_{ijkl} = r_{kj}(y_i - y_k) - \frac{z_{kj}(y_{ji}z_{kj} - y_{kj}z_{ji})}{r_{kj}} \quad (564)$$

$$\frac{d^2}{dy_l dz_j} d_{ijkl} = r_{kj}(-x_i + x_k) - \frac{z_{kj}(-x_{ji}z_{kj} + x_{kj}z_{ji})}{r_{kj}} \quad (565)$$

$$\frac{d^2}{dz_l dz_j} d_{ijkl} = -\frac{z_{kj}(x_{ji}y_{kj} - x_{kj}y_{ji})}{r_{kj}} \quad (566)$$

$$\begin{aligned} \frac{d^2}{dx_k^2} d_{ijkl} = & \frac{2x_{kj}(y_{ji}(z_j - z_l) + z_{ji}(-y_j + y_l))}{r_{kj}} \\ & + \frac{x_{ji}(y_{kj}z_{lk} - y_{lk}z_{kj}) + y_{ji}(-x_{kj}z_{lk} + x_{lk}z_{kj}) + z_{ji}(x_{kj}y_{lk} - x_{lk}y_{kj})}{r_{kj}} \\ & - \frac{x_{kj}^2(x_{ji}(y_{kj}z_{lk} - y_{lk}z_{kj}) + y_{ji}(-x_{kj}z_{lk} + x_{lk}z_{kj}) + z_{ji}(x_{kj}y_{lk} - x_{lk}y_{kj}))}{r_{kj}^3} \end{aligned} \quad (567)$$

$$\begin{aligned} \frac{d^2}{dy_k dx_k} d_{ijkl} = & \frac{x_{kj}(x_{ji}(-z_j + z_l) + z_{ji}(x_j - x_l))}{r_{kj}} \\ & + \frac{y_{kj}(y_{ji}(z_j - z_l) + z_{ji}(-y_j + y_l))}{r_{kj}} \\ & - \frac{x_{kj}y_{kj}(x_{ji}(y_{kj}z_{lk} - y_{lk}z_{kj}) + y_{ji}(-x_{kj}z_{lk} + x_{lk}z_{kj}) + z_{ji}(x_{kj}y_{lk} - x_{lk}y_{kj}))}{r_{kj}^3} \end{aligned} \quad (568)$$

$$\begin{aligned} \frac{d^2}{dz_k dx_k} d_{ijkl} = & \frac{x_{kj}(x_{ji}(y_j - y_l) + y_{ji}(-x_j + x_l))}{r_{kj}} \\ & + \frac{z_{kj}(y_{ji}(z_j - z_l) + z_{ji}(-y_j + y_l))}{r_{kj}} \\ & - \frac{x_{kj}z_{kj}(x_{ji}(y_{kj}z_{lk} - y_{lk}z_{kj}) + y_{ji}(-x_{kj}z_{lk} + x_{lk}z_{kj}) + z_{ji}(x_{kj}y_{lk} - x_{lk}y_{kj}))}{r_{kj}^3} \end{aligned} \quad (569)$$

$$\frac{d^2}{dx_l dx_k} d_{ijkl} = \frac{x_{kj} (y_{ji} z_{kj} - y_{kj} z_{ji})}{r_{kj}} \quad (570)$$

$$\frac{d^2}{dy_l dx_k} d_{ijkl} = r_{kj} z_{ji} + \frac{x_{kj} (-x_{ji} z_{kj} + x_{kj} z_{ji})}{r_{kj}} \quad (571)$$

$$\frac{d^2}{dz_l dx_k} d_{ijkl} = -r_{kj} y_{ji} + \frac{x_{kj} (x_{ji} y_{kj} - x_{kj} y_{ji})}{r_{kj}} \quad (572)$$

$$\begin{aligned} \frac{d^2}{dy_k^2} d_{ijkl} &= \frac{2y_{kj} (x_{ji} (-z_j + z_l) + z_{ji} (x_j - x_l))}{r_{kj}} \\ &+ \frac{x_{ji} (y_{kj} z_{lk} - y_{lk} z_{kj}) + y_{ji} (-x_{kj} z_{lk} + x_{lk} z_{kj}) + z_{ji} (x_{kj} y_{lk} - x_{lk} y_{kj})}{r_{kj}} \\ &- \frac{y_{kj}^2 (x_{ji} (y_{kj} z_{lk} - y_{lk} z_{kj}) + y_{ji} (-x_{kj} z_{lk} + x_{lk} z_{kj}) + z_{ji} (x_{kj} y_{lk} - x_{lk} y_{kj}))}{r_{kj}^3} \end{aligned} \quad (573)$$

$$\begin{aligned} \frac{d^2}{dz_k dy_k} d_{ijkl} &= \frac{y_{kj} (x_{ji} (y_j - y_l) + y_{ji} (-x_j + x_l))}{r_{kj}} \\ &+ \frac{z_{kj} (x_{ji} (-z_j + z_l) + z_{ji} (x_j - x_l))}{r_{kj}} \\ &- \frac{y_{kj} z_{kj} (x_{ji} (y_{kj} z_{lk} - y_{lk} z_{kj}) + y_{ji} (-x_{kj} z_{lk} + x_{lk} z_{kj}) + z_{ji} (x_{kj} y_{lk} - x_{lk} y_{kj}))}{r_{kj}^3} \end{aligned} \quad (574)$$

$$\frac{d^2}{dx_l dy_k} d_{ijkl} = -r_{kj} z_{ji} + \frac{y_{kj} (y_{ji} z_{kj} - y_{kj} z_{ji})}{r_{kj}} \quad (575)$$

$$\frac{d^2}{dy_l dy_k} d_{ijkl} = \frac{y_{kj} (-x_{ji} z_{kj} + x_{kj} z_{ji})}{r_{kj}} \quad (576)$$

$$\frac{d^2}{dz_l dy_k} d_{ijkl} = r_{kj} x_{ji} + \frac{y_{kj} (x_{ji} y_{kj} - x_{kj} y_{ji})}{r_{kj}} \quad (577)$$

$$\begin{aligned} \frac{d^2}{dz_k^2} d_{ijkl} &= \frac{2z_{kj} (x_{ji} (y_j - y_l) + y_{ji} (-x_j + x_l))}{r_{kj}} \\ &+ \frac{x_{ji} (y_{kj} z_{lk} - y_{lk} z_{kj}) + y_{ji} (-x_{kj} z_{lk} + x_{lk} z_{kj}) + z_{ji} (x_{kj} y_{lk} - x_{lk} y_{kj})}{r_{kj}} \\ &- \frac{z_{kj}^2 (x_{ji} (y_{kj} z_{lk} - y_{lk} z_{kj}) + y_{ji} (-x_{kj} z_{lk} + x_{lk} z_{kj}) + z_{ji} (x_{kj} y_{lk} - x_{lk} y_{kj}))}{r_{kj}^3} \end{aligned} \quad (578)$$

$$\frac{d^2}{dx_l dz_k} d_{ijkl} = r_{kj} y_{ji} + \frac{z_{kj} (y_{ji} z_{kj} - y_{kj} z_{ji})}{r_{kj}} \quad (579)$$

$$\frac{d^2}{dy_l dz_k} d_{ijkl} = -r_{kj} x_{ji} + \frac{z_{kj} (-x_{ji} z_{kj} + x_{kj} z_{ji})}{r_{kj}} \quad (580)$$

$$\frac{d^2}{dz_l dz_k} d_{ijkl} = \frac{z_{kj} (x_{ji} y_{kj} - x_{kj} y_{ji})}{r_{kj}} \quad (581)$$

$$\frac{d^2}{dx_l^2} d_{ijkl} = 0 \quad (582)$$

$$\frac{d^2}{dy_l dx_l} d_{ijkl} = 0 \quad (583)$$

$$\frac{d^2}{dz_l dx_l} d_{ijkl} = 0 \quad (584)$$

$$\frac{d^2}{dy_l^2} d_{ijkl} = 0 \quad (585)$$

$$\frac{d^2}{dz_l dy_l} d_{ijkl} = 0 \quad (586)$$

$$\frac{d^2}{dz_l^2} d_{ijkl} = 0 \quad (587)$$

### S1.3.5 Derivatives of $b_{ijk}$

The first and second order derivatives of  $b_{ijk}$  with respect to the coordinates  $x$ ,  $y$  and  $z$  of the participating atoms  $i$ ,  $j$  and  $k$  are:

$$\frac{d}{dx_i} b_{ijk} = \frac{d}{dx_i} b_{ijk} \quad (588)$$

$$\frac{d}{dy_i} b_{ijk} = \frac{d}{dy_i} b_{ijk} \quad (589)$$

$$\frac{d}{dz_i} b_{ijk} = \frac{d}{dz_i} b_{ijk} \quad (590)$$

$$\frac{d}{dx_j} b_{ijk} = \frac{d}{dx_j} b_{ijk} \quad (591)$$

$$\frac{d}{dy_j} b_{ijk} = \frac{d}{dy_j} b_{ijk} \quad (592)$$

$$\frac{d}{dz_j} b_{ijk} = \frac{d}{dz_j} b_{ijk} \quad (593)$$

$$\frac{d}{dx_k} b_{ijk} = \frac{d}{dx_k} b_{ijk} \quad (594)$$

$$\frac{d}{dy_k} b_{ijk} = \frac{d}{dy_k} b_{ijk} \quad (595)$$

$$\frac{d}{dz_k} b_{ijk} = \frac{d}{dz_k} b_{ijk} \quad (596)$$

$$\frac{d^2}{dx_i^2} b_{ijk} = \frac{d^2}{dx_i^2} b_{ijk} \quad (597)$$

$$\frac{d^2}{dy_i dx_i} b_{ijk} = \frac{d^2}{dy_i dx_i} b_{ijk} \quad (598)$$

$$\frac{d^2}{dz_i dx_i} b_{ijk} = \frac{d^2}{dz_i dx_i} b_{ijk} \quad (599)$$

$$\frac{d^2}{dx_j dx_i} b_{ijk} = \frac{d^2}{dx_j dx_i} b_{ijk} \quad (600)$$

$$\frac{d^2}{dy_j dx_i} b_{ijk} = \frac{d^2}{dy_j dx_i} b_{ijk} \quad (601)$$

$$\frac{d^2}{dz_j dx_i} b_{ijk} = \frac{d^2}{dz_j dx_i} b_{ijk} \quad (602)$$

$$\frac{d^2}{dx_k dx_i} b_{ijk} = \frac{d^2}{dx_k dx_i} b_{ijk} \quad (603)$$

$$\frac{d^2}{dy_k dx_i} b_{ijk} = \frac{d^2}{dy_k dx_i} b_{ijk} \quad (604)$$

$$\frac{d^2}{dz_k dx_i} b_{ijk} = \frac{d^2}{dz_k dx_i} b_{ijk} \quad (605)$$

$$\frac{d^2}{dy_i^2} b_{ijk} = \frac{d^2}{dy_i^2} b_{ijk} \quad (606)$$

$$\frac{d^2}{dz_i dy_i} b_{ijk} = \frac{d^2}{dz_i dy_i} b_{ijk} \quad (607)$$

$$\frac{d^2}{dx_j dy_i} b_{ijk} = \frac{d^2}{dy_i dx_j} b_{ijk} \quad (608)$$

$$\frac{d^2}{dy_j dy_i} b_{ijk} = \frac{d^2}{dy_j dy_i} b_{ijk} \quad (609)$$

$$\frac{d^2}{dz_j dy_i} b_{ijk} = \frac{d^2}{dz_j dy_i} b_{ijk} \quad (610)$$

$$\frac{d^2}{dx_k dy_i} b_{ijk} = \frac{d^2}{dy_i dx_k} b_{ijk} \quad (611)$$

$$\frac{d^2}{dy_k dy_i} b_{ijk} = \frac{d^2}{dy_k dy_i} b_{ijk} \quad (612)$$

$$\frac{d^2}{dz_k dy_i} b_{ijk} = \frac{d^2}{dz_k dy_i} b_{ijk} \quad (613)$$

$$\frac{d^2}{dz_i^2} b_{ijk} = \frac{d^2}{dz_i^2} b_{ijk} \quad (614)$$

$$\frac{d^2}{dx_j dz_i} b_{ijk} = \frac{d^2}{dz_i dx_j} b_{ijk} \quad (615)$$

$$\frac{d^2}{dy_j dz_i} b_{ijk} = \frac{d^2}{dz_i dy_j} b_{ijk} \quad (616)$$

$$\frac{d^2}{dz_j dz_i} b_{ijk} = \frac{d^2}{dz_j dz_i} b_{ijk} \quad (617)$$

$$\frac{d^2}{dx_k dz_i} b_{ijk} = \frac{d^2}{dz_i dx_k} b_{ijk} \quad (618)$$

$$\frac{d^2}{dy_k dz_i} b_{ijk} = \frac{d^2}{dz_i dy_k} b_{ijk} \quad (619)$$

$$\frac{d^2}{dz_k dz_i} b_{ijk} = \frac{d^2}{dz_k dz_i} b_{ijk} \quad (620)$$

$$\frac{d^2}{dx_j^2} b_{ijk} = \frac{d^2}{dx_j^2} b_{ijk} \quad (621)$$

$$\frac{d^2}{dy_j dx_j} b_{ijk} = \frac{d^2}{dy_j dx_j} b_{ijk} \quad (622)$$

$$\frac{d^2}{dz_j dx_j} b_{ijk} = \frac{d^2}{dz_j dx_j} b_{ijk} \quad (623)$$

$$\frac{d^2}{dx_k dx_j} b_{ijk} = \frac{d^2}{dx_k dx_j} b_{ijk} \quad (624)$$

$$\frac{d^2}{dy_k dx_j} b_{ijk} = \frac{d^2}{dy_k dx_j} b_{ijk} \quad (625)$$

$$\frac{d^2}{dz_k dx_j} b_{ijk} = \frac{d^2}{dz_k dx_j} b_{ijk} \quad (626)$$

$$\frac{d^2}{dy_j^2} b_{ijk} = \frac{d^2}{dy_j^2} b_{ijk} \quad (627)$$

$$\frac{d^2}{dz_j dy_j} b_{ijk} = \frac{d^2}{dz_j dy_j} b_{ijk} \quad (628)$$

$$\frac{d^2}{dx_k dy_j} b_{ijk} = \frac{d^2}{dy_j dx_k} b_{ijk} \quad (629)$$

$$\frac{d^2}{dy_k dy_j} b_{ijk} = \frac{d^2}{dy_k dy_j} b_{ijk} \quad (630)$$

$$\frac{d^2}{dz_k dy_j} b_{ijk} = \frac{d^2}{dz_k dy_j} b_{ijk} \quad (631)$$

$$\frac{d^2}{dz_j^2} b_{ijk} = \frac{d^2}{dz_j^2} b_{ijk} \quad (632)$$

$$\frac{d^2}{dx_k dz_j} b_{ijk} = \frac{d^2}{dz_j dx_k} b_{ijk} \quad (633)$$

$$\frac{d^2}{dy_k dz_j} b_{ijk} = \frac{d^2}{dz_j dy_k} b_{ijk} \quad (634)$$

$$\frac{d^2}{dz_k dz_j} b_{ijk} = \frac{d^2}{dz_k dz_j} b_{ijk} \quad (635)$$

$$\frac{d^2}{dx_k^2} b_{ijk} = \frac{d^2}{dx_k^2} b_{ijk} \quad (636)$$

$$\frac{d^2}{dy_k dx_k} b_{ijk} = \frac{d^2}{dy_k dx_k} b_{ijk} \quad (637)$$

$$\frac{d^2}{dz_k dx_k} b_{ijk} = \frac{d^2}{dz_k dx_k} b_{ijk} \quad (638)$$

$$\frac{d^2}{dy_k^2} b_{ijk} = \frac{d^2}{dy_k^2} b_{ijk} \quad (639)$$

$$\frac{d^2}{dz_k dy_k} b_{ijk} = \frac{d^2}{dz_k dy_k} b_{ijk} \quad (640)$$

$$\frac{d^2}{dz_k^2} b_{ijk} = \frac{d^2}{dz_k^2} b_{ijk} \quad (641)$$

The first and second order derivatives of  $b_{ijk}$  are equivalent to the derivatives of  $b_{jkl}$  by interchanging atomic indices.

## S1.4 Coulomb Repulsion

A single Coulomb repulsion between two atoms  $i$  and  $j$  is given by

$$E_{\text{Coulomb},ij} = \frac{Q}{r_{ij}} \quad (642)$$

### S1.4.1 Derivatives of $E_{\text{Coulomb},ij}$

The first and second order derivatives of  $E_{\text{Coulomb},ij}$  with respect to the coordinates of the participating atoms are:

$$\frac{d}{dx_i} E_{\text{Coulomb},ij} = -\frac{Q \frac{d}{dx_i} r_{ij}}{r_{ij}^2} \quad (643)$$

$$\frac{d}{dy_i} E_{\text{Coulomb},ij} = -\frac{Q \frac{d}{dy_i} r_{ij}}{r_{ij}^2} \quad (644)$$

$$\frac{d}{dz_i} E_{\text{Coulomb},ij} = -\frac{Q \frac{d}{dz_i} r_{ij}}{r_{ij}^2} \quad (645)$$

$$\frac{d}{dx_j} E_{\text{Coulomb},ij} = -\frac{Q \frac{d}{dx_j} r_{ij}}{r_{ij}^2} \quad (646)$$

$$\frac{d}{dy_j} E_{\text{Coulomb},ij} = -\frac{Q \frac{d}{dy_j} r_{ij}}{r_{ij}^2} \quad (647)$$

$$\frac{d}{dz_j} E_{\text{Coulomb},ij} = -\frac{Q \frac{d}{dz_j} r_{ij}}{r_{ij}^2} \quad (648)$$

$$\frac{d^2}{dx_i^2} E_{\text{Coulomb},ij} = -\frac{Q \frac{d^2}{dx_i^2} r_{ij}}{r_{ij}^2} + \frac{2Q \left( \frac{d}{dx_i} r_{ij} \right)^2}{r_{ij}^3} \quad (649)$$

$$\frac{d^2}{dy_i dx_i} E_{\text{Coulomb},ij} = -\frac{Q \frac{d^2}{dy_i dx_i} r_{ij}}{r_{ij}^2} + \frac{2Q \frac{d}{dx_i} r_{ij} \frac{d}{dy_i} r_{ij}}{r_{ij}^3} \quad (650)$$

$$\frac{d^2}{dz_i dx_i} E_{\text{Coulomb},ij} = -\frac{Q \frac{d^2}{dz_i dx_i} r_{ij}}{r_{ij}^2} + \frac{2Q \frac{d}{dx_i} r_{ij} \frac{d}{dz_i} r_{ij}}{r_{ij}^3} \quad (651)$$

$$\frac{d^2}{dx_j dx_i} E_{\text{Coulomb},ij} = -\frac{Q \frac{d^2}{dx_j dx_i} r_{ij}}{r_{ij}^2} + \frac{2Q \frac{d}{dx_i} r_{ij} \frac{d}{dx_j} r_{ij}}{r_{ij}^3} \quad (652)$$

$$\frac{d^2}{dy_j dx_i} E_{\text{Coulomb},ij} = -\frac{Q \frac{d^2}{dy_j dx_i} r_{ij}}{r_{ij}^2} + \frac{2Q \frac{d}{dx_i} r_{ij} \frac{d}{dy_j} r_{ij}}{r_{ij}^3} \quad (653)$$

$$\frac{d^2}{dz_j dx_i} E_{\text{Coulomb},ij} = -\frac{Q \frac{d^2}{dz_j dx_i} r_{ij}}{r_{ij}^2} + \frac{2Q \frac{d}{dx_i} r_{ij} \frac{d}{dz_j} r_{ij}}{r_{ij}^3} \quad (654)$$

$$\frac{d^2}{dy_i^2} E_{\text{Coulomb},ij} = -\frac{Q \frac{d^2}{dy_i^2} r_{ij}}{r_{ij}^2} + \frac{2Q \left( \frac{d}{dy_i} r_{ij} \right)^2}{r_{ij}^3} \quad (655)$$

$$\frac{d^2}{dz_i dy_i} E_{\text{Coulomb},ij} = -\frac{Q \frac{d^2}{dz_i dy_i} r_{ij}}{r_{ij}^2} + \frac{2Q \frac{d}{dy_i} r_{ij} \frac{d}{dz_i} r_{ij}}{r_{ij}^3} \quad (656)$$

$$\frac{d^2}{dx_j dy_i} E_{\text{Coulomb},ij} = -\frac{Q \frac{d^2}{dx_j dy_i} r_{ij}}{r_{ij}^2} + \frac{2Q \frac{d}{dx_j} r_{ij} \frac{d}{dy_i} r_{ij}}{r_{ij}^3} \quad (657)$$

$$\frac{d^2}{dy_j dy_i} E_{\text{Coulomb},ij} = -\frac{Q \frac{d^2}{dy_j dy_i} r_{ij}}{r_{ij}^2} + \frac{2Q \frac{d}{dy_i} r_{ij} \frac{d}{dy_j} r_{ij}}{r_{ij}^3} \quad (658)$$

$$\frac{d^2}{dz_j dy_i} E_{\text{Coulomb},ij} = -\frac{Q \frac{d^2}{dz_j dy_i} r_{ij}}{r_{ij}^2} + \frac{2Q \frac{d}{dy_i} r_{ij} \frac{d}{dz_j} r_{ij}}{r_{ij}^3} \quad (659)$$

$$\frac{d^2}{dz_i^2} E_{\text{Coulomb},ij} = -\frac{Q \frac{d^2}{dz_i^2} r_{ij}}{r_{ij}^2} + \frac{2Q \left( \frac{d}{dz_i} r_{ij} \right)^2}{r_{ij}^3} \quad (660)$$

$$\frac{d^2}{dx_j dz_i} E_{\text{Coulomb},ij} = -\frac{Q \frac{d^2}{dx_j dz_i} r_{ij}}{r_{ij}^2} + \frac{2Q \frac{d}{dx_j} r_{ij} \frac{d}{dz_i} r_{ij}}{r_{ij}^3} \quad (661)$$

$$\frac{d^2}{dy_j dz_i} E_{\text{Coulomb},ij} = -\frac{Q \frac{d^2}{dy_j dz_i} r_{ij}}{r_{ij}^2} + \frac{2Q \frac{d}{dy_j} r_{ij} \frac{d}{dz_i} r_{ij}}{r_{ij}^3} \quad (662)$$

$$\frac{d^2}{dz_j dz_i} E_{\text{Coulomb},ij} = -\frac{Q \frac{d^2}{dz_j dz_i} r_{ij}}{r_{ij}^2} + \frac{2Q \frac{d}{dz_i} r_{ij} \frac{d}{dz_j} r_{ij}}{r_{ij}^3} \quad (663)$$



$$\frac{d^2}{dx_j^2} E_{\text{Coulomb},ij} = -\frac{Q \frac{d^2}{dx_j^2} r_{ij}}{r_{ij}^2} + \frac{2Q \left( \frac{d}{dx_j} r_{ij} \right)^2}{r_{ij}^3} \quad (664)$$

$$\frac{d^2}{dy_j dx_j} E_{\text{Coulomb},ij} = -\frac{Q \frac{d^2}{dy_j dx_j} r_{ij}}{r_{ij}^2} + \frac{2Q \frac{d}{dx_j} r_{ij} \frac{d}{dy_j} r_{ij}}{r_{ij}^3} \quad (665)$$

$$\frac{d^2}{dz_j dx_j} E_{\text{Coulomb},ij} = -\frac{Q \frac{d^2}{dz_j dx_j} r_{ij}}{r_{ij}^2} + \frac{2Q \frac{d}{dx_j} r_{ij} \frac{d}{dz_j} r_{ij}}{r_{ij}^3} \quad (666)$$

$$\frac{d^2}{dy_j^2} E_{\text{Coulomb},ij} = -\frac{Q \frac{d^2}{dy_j^2} r_{ij}}{r_{ij}^2} + \frac{2Q \left( \frac{d}{dy_j} r_{ij} \right)^2}{r_{ij}^3} \quad (667)$$

$$\frac{d^2}{dz_j dy_j} E_{\text{Coulomb},ij} = -\frac{Q \frac{d^2}{dz_j dy_j} r_{ij}}{r_{ij}^2} + \frac{2Q \frac{d}{dy_j} r_{ij} \frac{d}{dz_j} r_{ij}}{r_{ij}^3} \quad (668)$$

$$\frac{d^2}{dz_j^2} E_{\text{Coulomb},ij} = -\frac{Q \frac{d^2}{dz_j^2} r_{ij}}{r_{ij}^2} + \frac{2Q \left( \frac{d}{dz_j} r_{ij} \right)^2}{r_{ij}^3} \quad (669)$$

The first and second order derivatives of  $r_{ij}$  can be found in the section S1.1.2.

## S2 Reference Geometries

In the Tables S2 and S2 , we enumerate the reference geometries, most of them from VSEPR theory [2], employed in the structural unification workflow for extracting angle constraints. Our future intention is to broaden this listing by incorporating additional reference geometries that exhibit greater deviations from the ideal geometry and are more general. The symbol  $n_{\text{adj}}$  denotes the count of adjacent atoms surrounding the central atom. The central atom is represented by the grey dummy atom, serving as a placeholder. The adjacent dummy atoms are depicted as white atoms. All bond lengths are standardized to 1.0 Å.

Table S1: Reference geometries used for extracting angle constraints with  $n_{\text{adj}} \leq 4$ .

| $n_{\text{adj}}$ | class              | reference geometry                                                                  | angles                                | comment                                                    |
|------------------|--------------------|-------------------------------------------------------------------------------------|---------------------------------------|------------------------------------------------------------|
| 1                | linear CN=1        |    | -                                     |                                                            |
| 2                | linear CN=2        |    | $\pi$                                 |                                                            |
|                  | bent               |    | $\frac{2}{3}\pi$                      |                                                            |
| 2                | trigonal planar    |    | $\frac{2}{3}\pi$                      |                                                            |
|                  | trigonal pyramidal |    | $0.606\pi$                            |                                                            |
|                  | t-shaped           |    | $\frac{1}{2}\pi, \pi$                 |                                                            |
| 4                | tetrahedral        |  | $0.606\pi$                            |                                                            |
|                  | seesaw             |  | $\pi, \frac{2}{3}\pi, \frac{1}{2}\pi$ |                                                            |
|                  | square planar      |  | $\frac{1}{2}\pi, \pi$                 |                                                            |
|                  | ferrocene          |  | $0.6\pi, 0.394\pi, 0.7\pi$            | used for carbon atom in ferrocene for example              |
|                  | formate            |  | $\frac{1}{3}\pi, \frac{2}{3}\pi, \pi$ | used for the central coordinating atom in a formate ligand |

## References

- [1] Jorge Nocedal and Stephen J Wright. Conjugate gradient methods. *Numerical Optimization*, pages 101–134, 2006.
- [2] Ronald J Gillespie. The VSEPR model revisited. *Chemical Society Reviews*, 21(1):59–69, 1992.

Table S2: Reference geometries used for extracting angle constraints with  $n_{\text{adj}} > 4$ .

| $n_{\text{adj}}$ | class                          | reference geometry                                                                  | angles                                                | comment                                            |
|------------------|--------------------------------|-------------------------------------------------------------------------------------|-------------------------------------------------------|----------------------------------------------------|
| 5                | square pyramidal               |    | $\frac{1}{2}\pi, \pi$                                 |                                                    |
|                  | trigonal bipyramidal           |    | $\frac{1}{2}\pi, \frac{2}{3}\pi, \pi$                 |                                                    |
| 6                | octahedral                     |   | $\frac{1}{2}\pi, \pi$                                 |                                                    |
| 7                | pentagonal bipyramidal         |  | $0.4\pi, 0.8\pi, \pi$                                 |                                                    |
|                  | pentagonal bipyramidal formate |  | $\frac{1}{4}\pi, \frac{1}{2}\pi, \frac{3}{4}\pi, \pi$ | used for the metal center with a formate ligand    |
| 8                | square antiprismatic           |  | $0.394\pi, 0.605\pi, \pi$                             |                                                    |
| >8               | unkown                         |                                                                                     |                                                       | geometry is constrained by Coulomb repulsion only. |
